# Supplementary material for: Cyclic telluride reagents with remarkable glutathione peroxidase-like activity for purification-free synthesis of highly pure organodisulfides
Source: Royal Society of Chemistry journal article supplement (doi:10.1039/c9cy00562e), 2019-01-01
Supplement: c9cy00562e1.pdf [file c9cy00562e1.pdf]

## Supporting information

### Cyclic telluride reagents with remarkable glutathione peroxidase-like activity for purification-free synthesis of highly pure organodisulfides

Kenta Arai\*, Yuui Osaka, Masahiro Haneda, and Yuumi Sato

Department of Chemistry, School of Science, Tokai University, Kitakaname, Hiratsuka-shi, Kanagawa 259-1292, Japan

\*Corresponding author: k-arai4470@tokai-u.jp (KA)

## Contents

### 1. NMR spectra

|     |                                                                                         |      |
|-----|-----------------------------------------------------------------------------------------|------|
| 1.1 | <i>tert</i> -Butyl ( <i>S</i> )-(tetrahydrotellurophen-3-yl)carbamate ( <b>7</b> )      | ...3 |
| 1.2 | <i>tert</i> -Butyl ( <i>S</i> )-(tetrahydro-2H-telluropyran-3-yl)carbamate ( <b>8</b> ) | ...4 |
| 1.3 | ( <i>S</i> )-Tetrahydrotellurophen-3-amine hydrochloride ( <b>4</b> )                   | ...5 |
| 1.4 | ( <i>S</i> )-Tetrahydro-2H-telluropyran-3-amine hydrochloride ( <b>5</b> )              | ...6 |
| 1.5 | NMR spectra of disulfides ( <b>16a–s</b> )                                              | ...7 |

### 2. Supplemental Figures and Tables

|                |                                                                                                                                                 |       |
|----------------|-------------------------------------------------------------------------------------------------------------------------------------------------|-------|
| <b>Fig. S1</b> | ESI(+)-MS spectral changes upon the oxidation and subsequent reduction of <b>4</b> in H <sub>2</sub> O at 25 °C.                                | ...26 |
| <b>Fig. S2</b> | <sup>1</sup> H NMR spectral changes upon oxidation and subsequent reduction of tellurides <b>4–6</b> in D <sub>2</sub> O at 25 °C.              | ...27 |
| <b>Fig. S3</b> | <sup>1</sup> H NMR spectral changes upon oxidation and subsequent reduction of tellurides <b>7</b> and <b>8</b> in CD <sub>3</sub> OD at 25 °C. | ...28 |
| <b>Fig. S4</b> | GPx-like activity coupled with reduction of GSSG by NADPH in the presence of glutathione reductase                                              | ...29 |

|                                                                                                                                         |       |
|-----------------------------------------------------------------------------------------------------------------------------------------|-------|
| <b>Fig. S5</b> Effect of H <sub>2</sub> O <sub>2</sub> concentration on GPx-like activity in buffer solution.                           | ...30 |
| <b>Fig. S6</b> GPx-like activity coupled with oxidation of benzenethiol ( <b>15a</b> ) in CHCl <sub>3</sub> .                           | ...31 |
| <b>Fig. S7</b> Effect of CHP concentration on GPx-like activity in CHCl <sub>3</sub>                                                    | ...32 |
| <b>Fig. S8</b> <sup>1</sup> H NMR spectra obtained from aerial oxidation experiments of <b>15e</b> by using cyclic telluride catalysts. | ...33 |
| <b>Fig. S9</b> Residence time effect on the catalytic oxidation of <b>15b</b> in a segmented-microflow system.                          | ...34 |
| <b>Fig. S10</b> Isolated yield of <b>16e</b> during five reuse of telluride catalysts <b>4–6</b> .                                      | ...34 |
| <b>Fig. S11</b> Isolated yield of <b>16r</b> during six consecutive cycles of catalyst <b>7</b> .                                       | ...35 |
| <b>Fig. S12</b> Cytotoxicity of compounds <b>4–6</b> at different concentrations determined by MTT assay with HeLa cells.               | ...36 |
| <b>Fig. S13</b> Schematic and photographs of flow setup for the oxidation of fat-soluble thioils.                                       | ...37 |
| <b>Fig. S14</b> Schematic of flow setup for the oxidation of water-soluble thiols.                                                      | ...38 |
| <b>Table S1</b> Catalytic oxidation of thiols in a biphasic organic-aqueous system under batch condition                                | ...39 |
| <b>Table S2</b> Optimization of tubing ID of microflow channel.                                                                         | ...40 |
| <b>Table S3</b> Catalytic oxidation of thiols in a biphasic organic-aqueous system under a batch or segmented microflow condition.      | ...41 |
| <b>3. References</b>                                                                                                                    | ...42 |

## 1. NMR spectra

### 1.1 *tert*-Butyl (*S*)-(tetrahydrotellurophen-3-yl)carbamate (**7**)

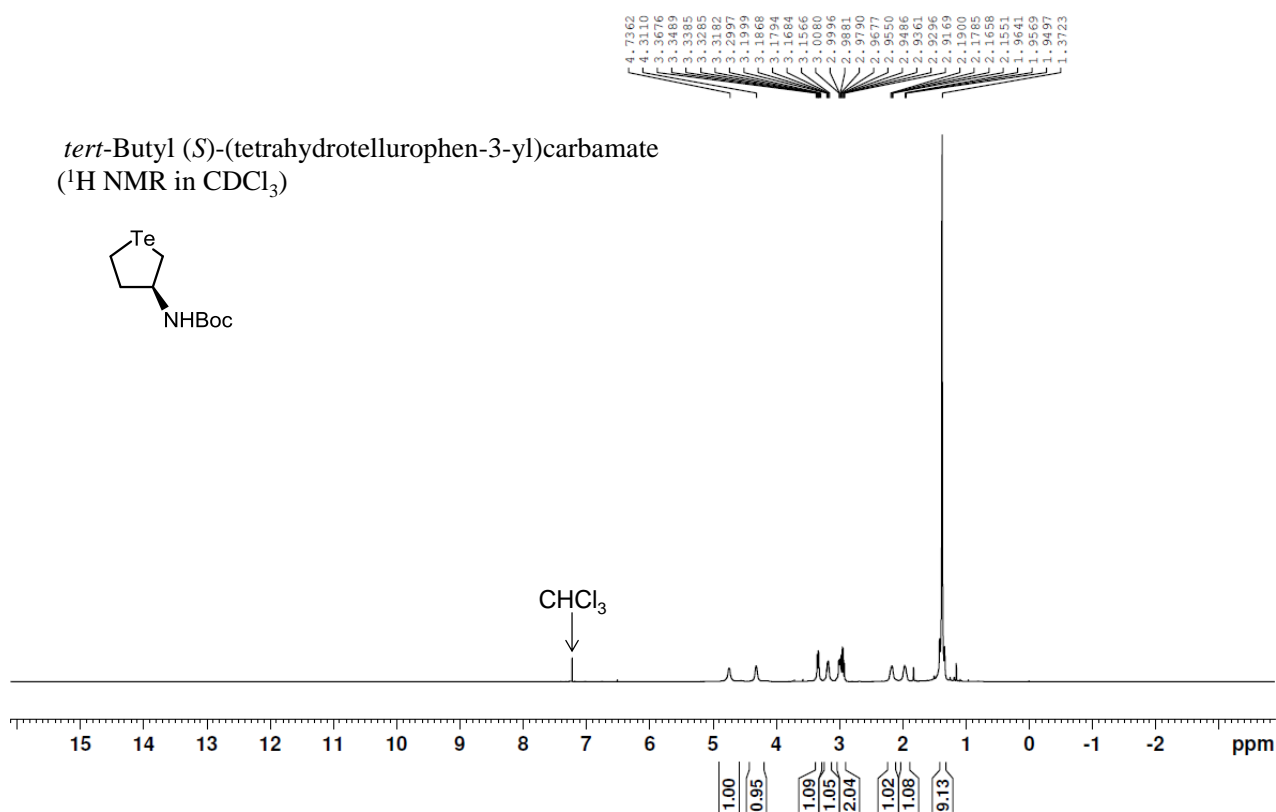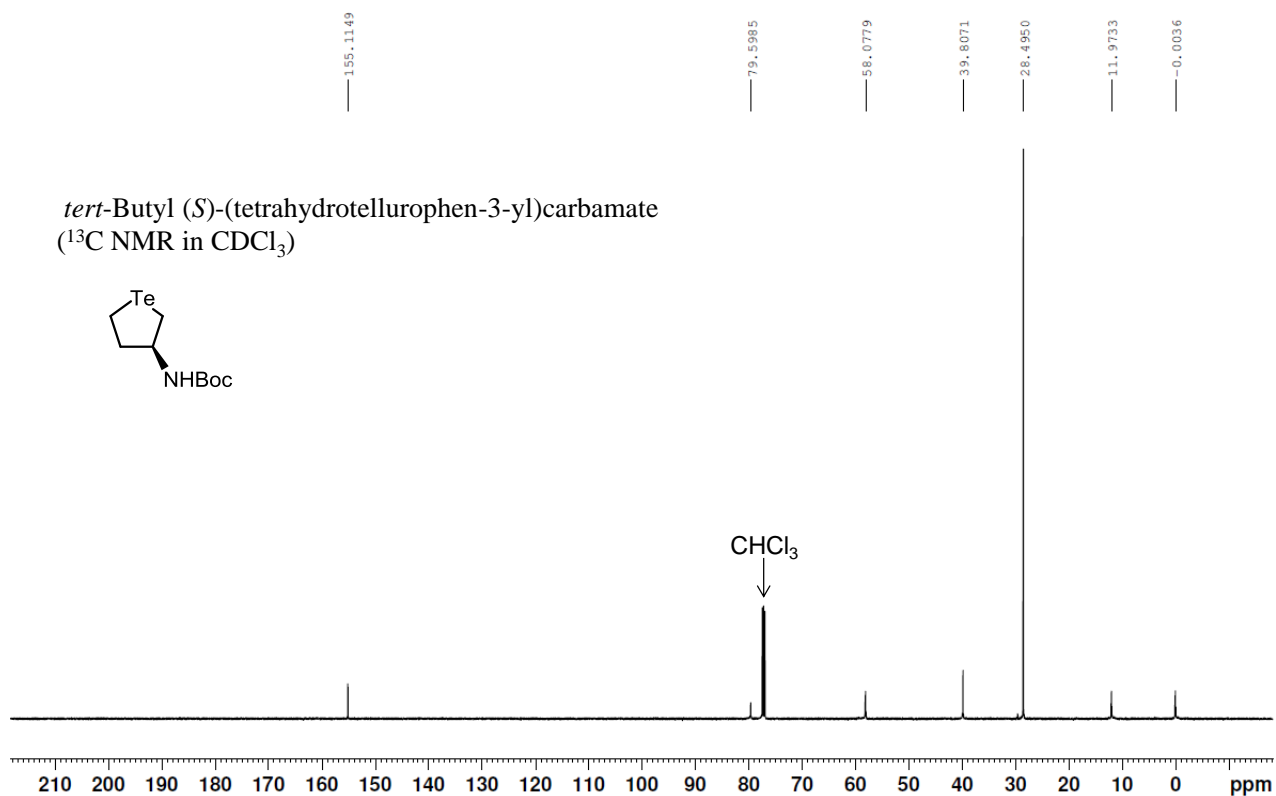

1.2 *tert*-Butyl (*S*)-(tetrahydro-2H-telluropyran-3-yl)carbamate (**8**)

*tert*-Butyl (*S*)-(tetrahydro-2H-telluropyran-3-yl)carbamate  
(<sup>1</sup>H NMR in CDCl<sub>3</sub>)

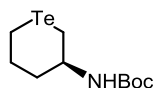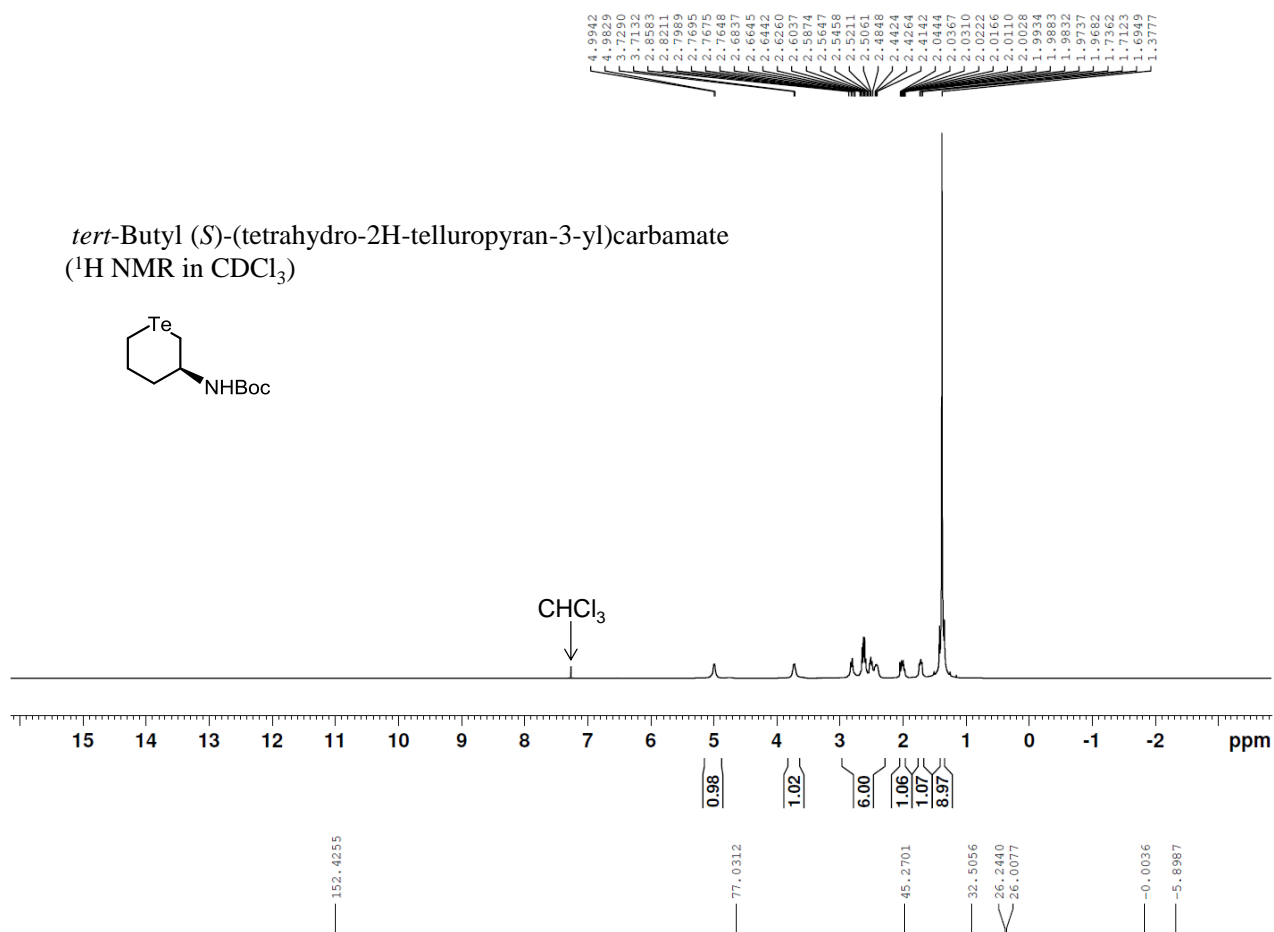

*tert*-Butyl (*S*)-(tetrahydro-2H-telluropyran-3-yl)carbamate  
(<sup>13</sup>C NMR in CDCl<sub>3</sub>)

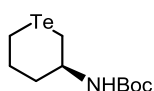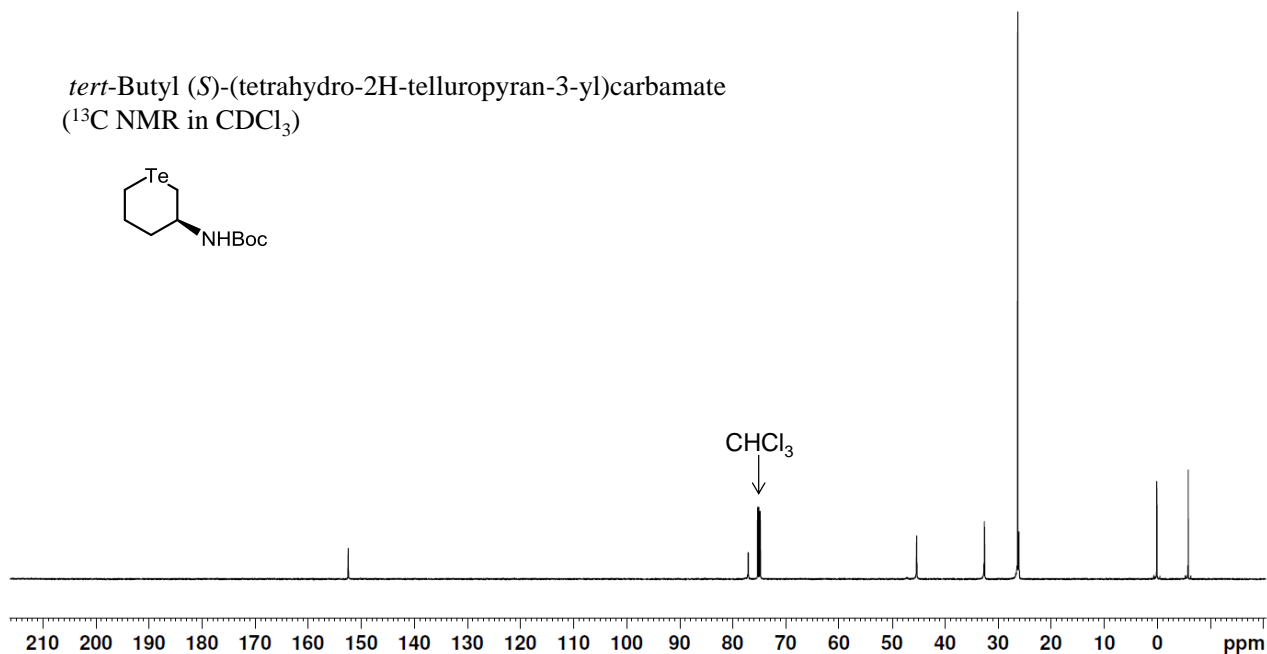

### 1.3 (*S*)-Tetrahydrotellurophen-3-amine hydrochloride (**4**)

(*S*)-Tetrahydrotellurophen-3-amine hydrochloride  
(<sup>1</sup>H NMR in D<sub>2</sub>O)

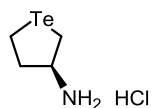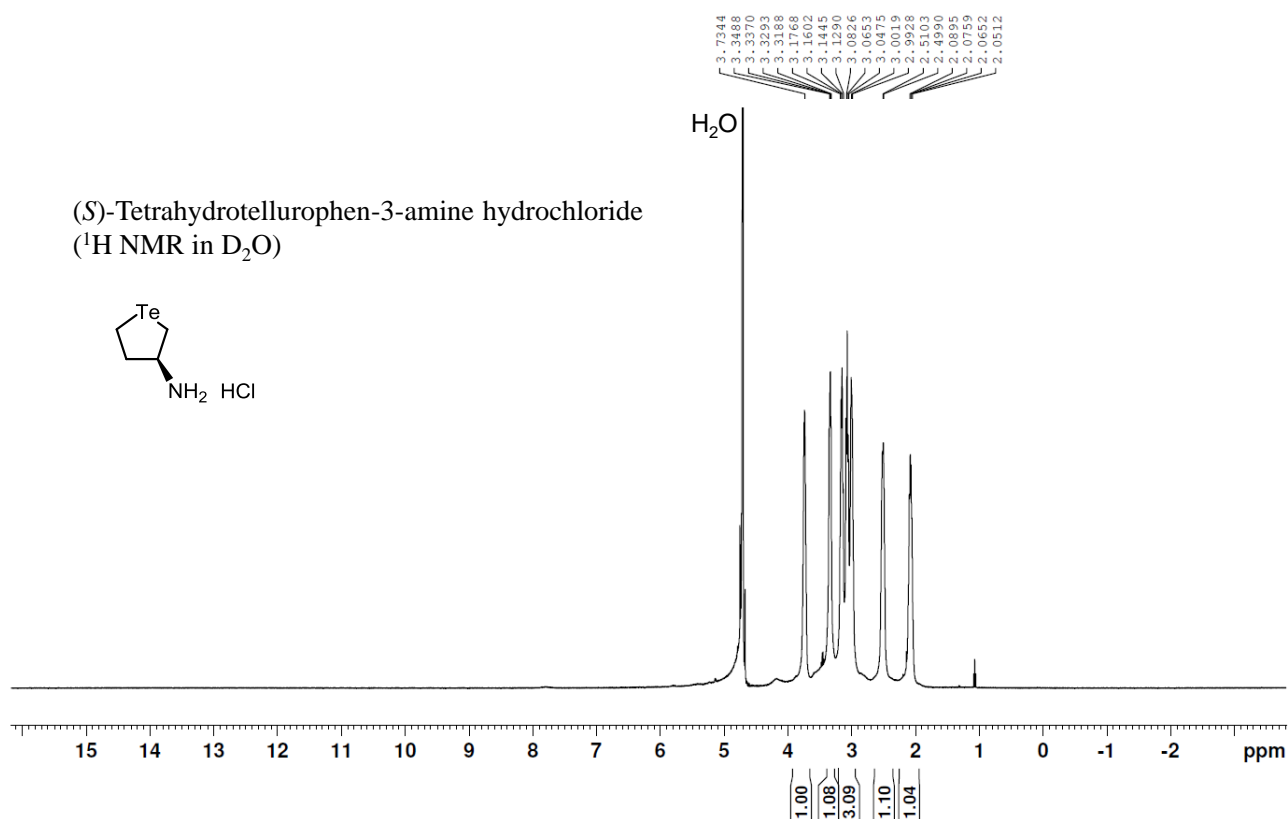

(*S*)-Tetrahydrotellurophen-3-amine hydrochloride  
(<sup>13</sup>C NMR in D<sub>2</sub>O)

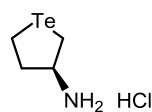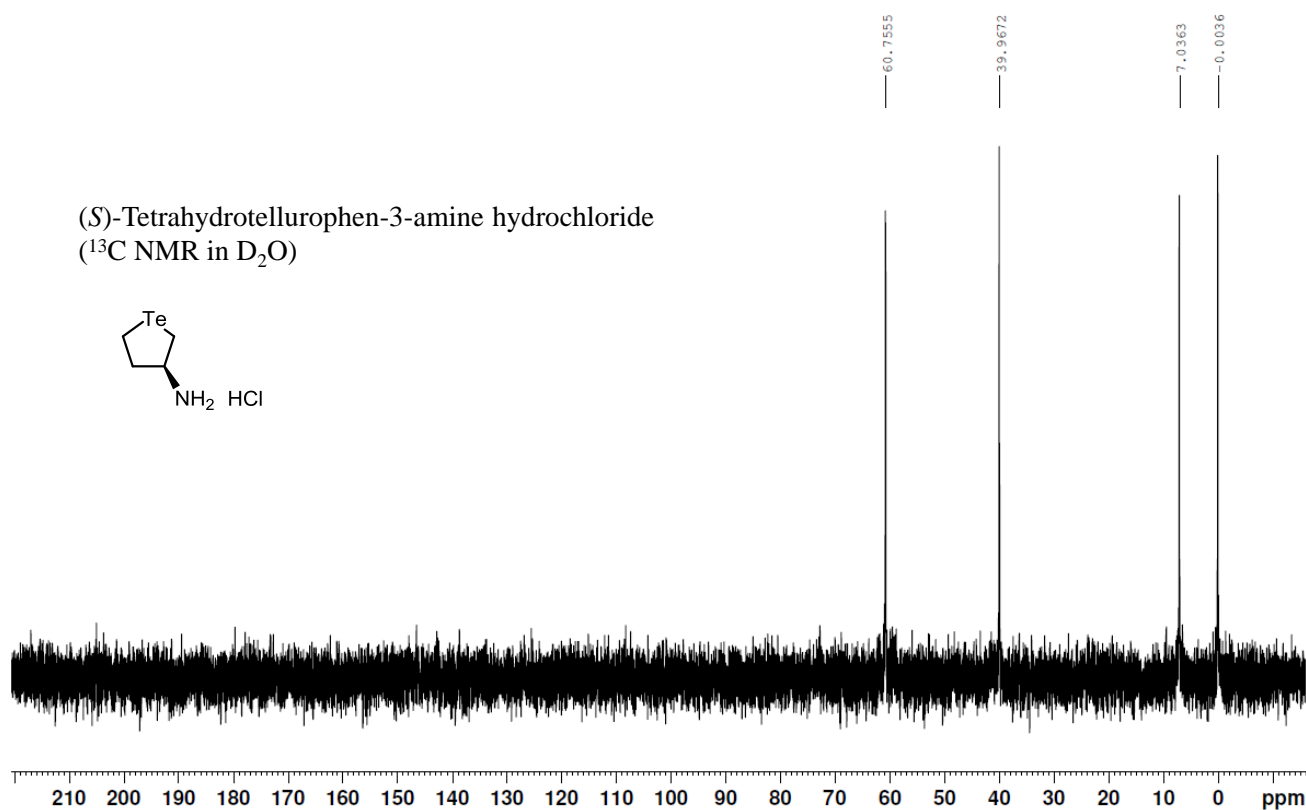

# 1.4 (*S*)-Tetrahydro-2*H*-telluropyran-3-amine hydrochloride (**5**)

(*S*)-Tetrahydro-2*H*-telluropyran-3-amine hydrochloride  
(<sup>1</sup>H NMR in D<sub>2</sub>O)

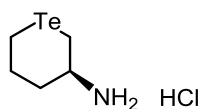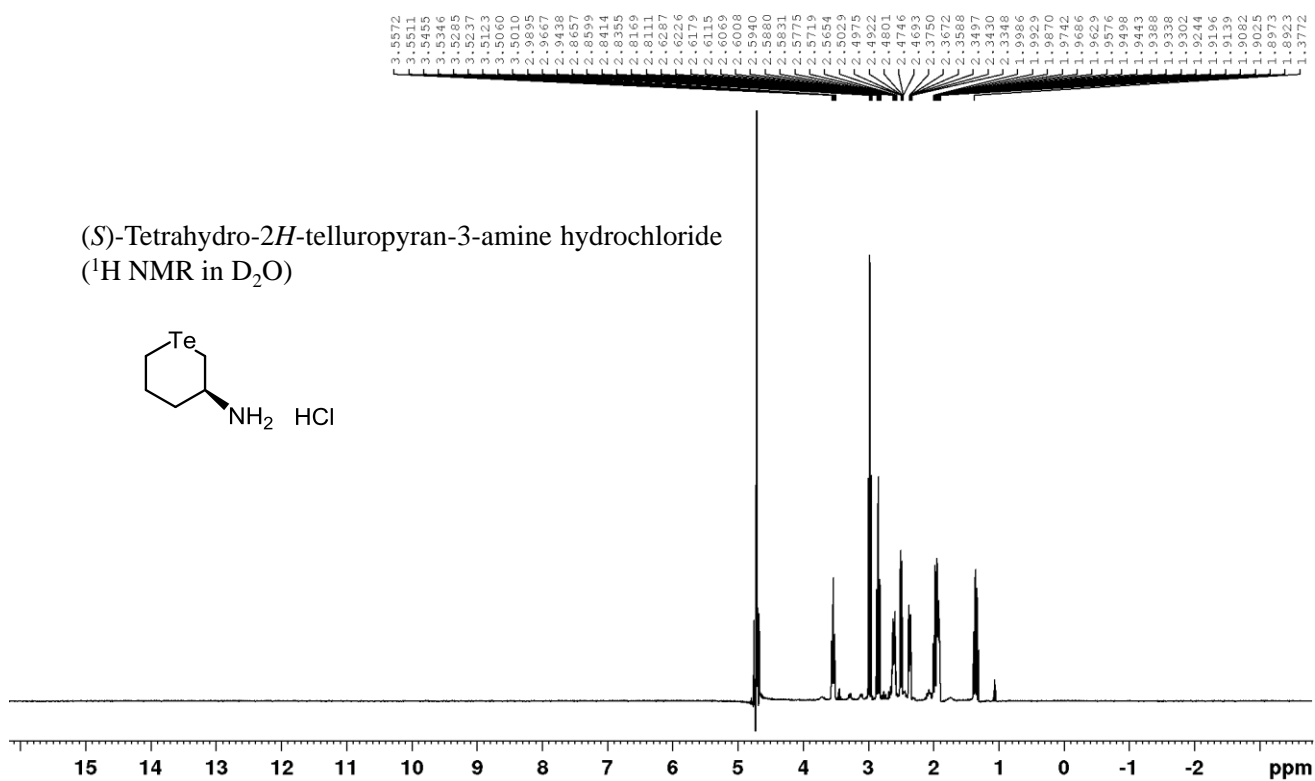

(*S*)-Tetrahydro-2*H*-telluropyran-3-amine hydrochloride  
(<sup>13</sup>C NMR in D<sub>2</sub>O)

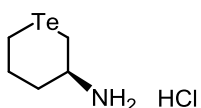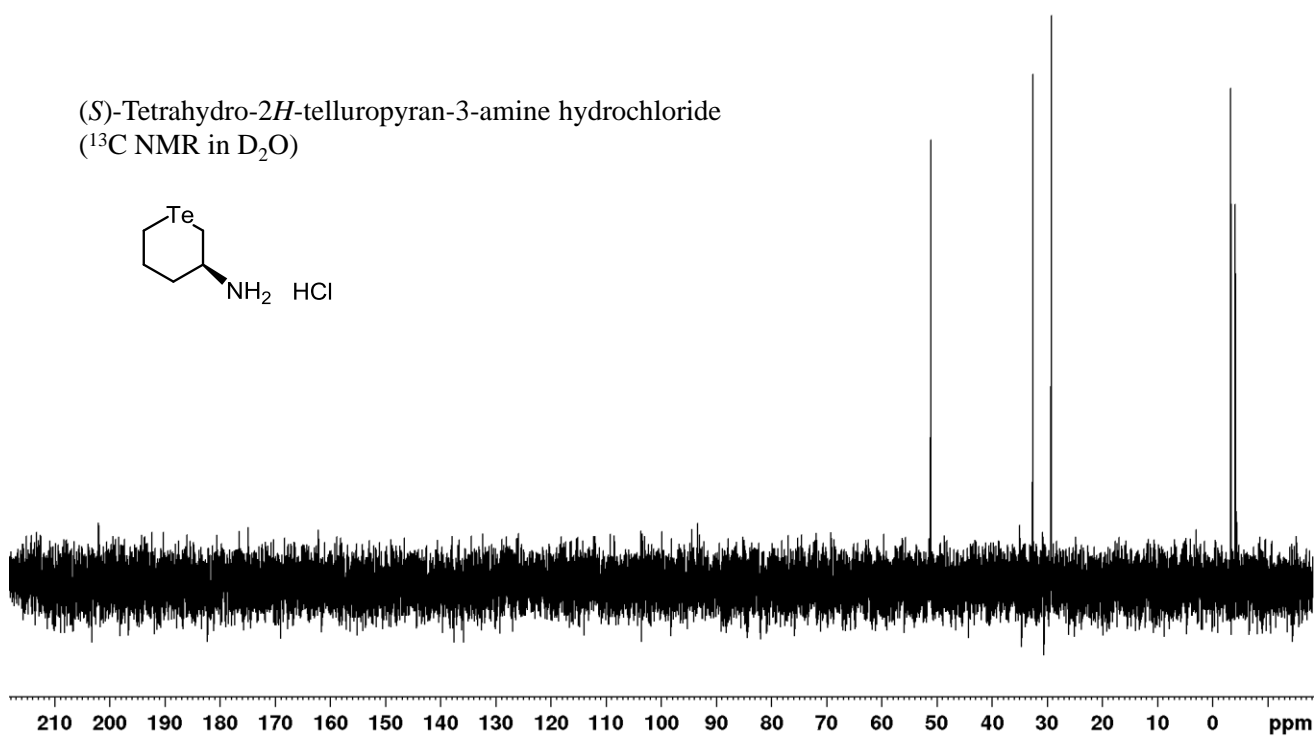

## 1.5 NMR spectra of disulfides (**16a-t**)

### 1,2-Didecyl disulfide (**16a**)

Colorless oil; Yield in batch: 38.7 mg (99%) and 38.5 mg (98%) using **4** and **6**, respectively; Yield in flow: 39.4 mg (quant.) using **4**;  $^1\text{H}$  NMR ( $\text{CDCl}_3$ ):  $\delta$  = 2.60 (t,  $J$  = 7.4 Hz, 4H), 1.63–1.57 (m, 4H), 1.32–1.20 (m, 28H), 0.81 ppm (t,  $J$  = 6.7 Hz, 4H);  $^{13}\text{C}$  NMR ( $\text{CDCl}_3$ ):  $\delta$  = 39.22, 31.92, 29.59, 29.55, 29.34, 29.27, 29.25, 28.56, 22.71, 14.13 ppm. Spectroscopic data are in accordance with the previously presented.<sup>1</sup>

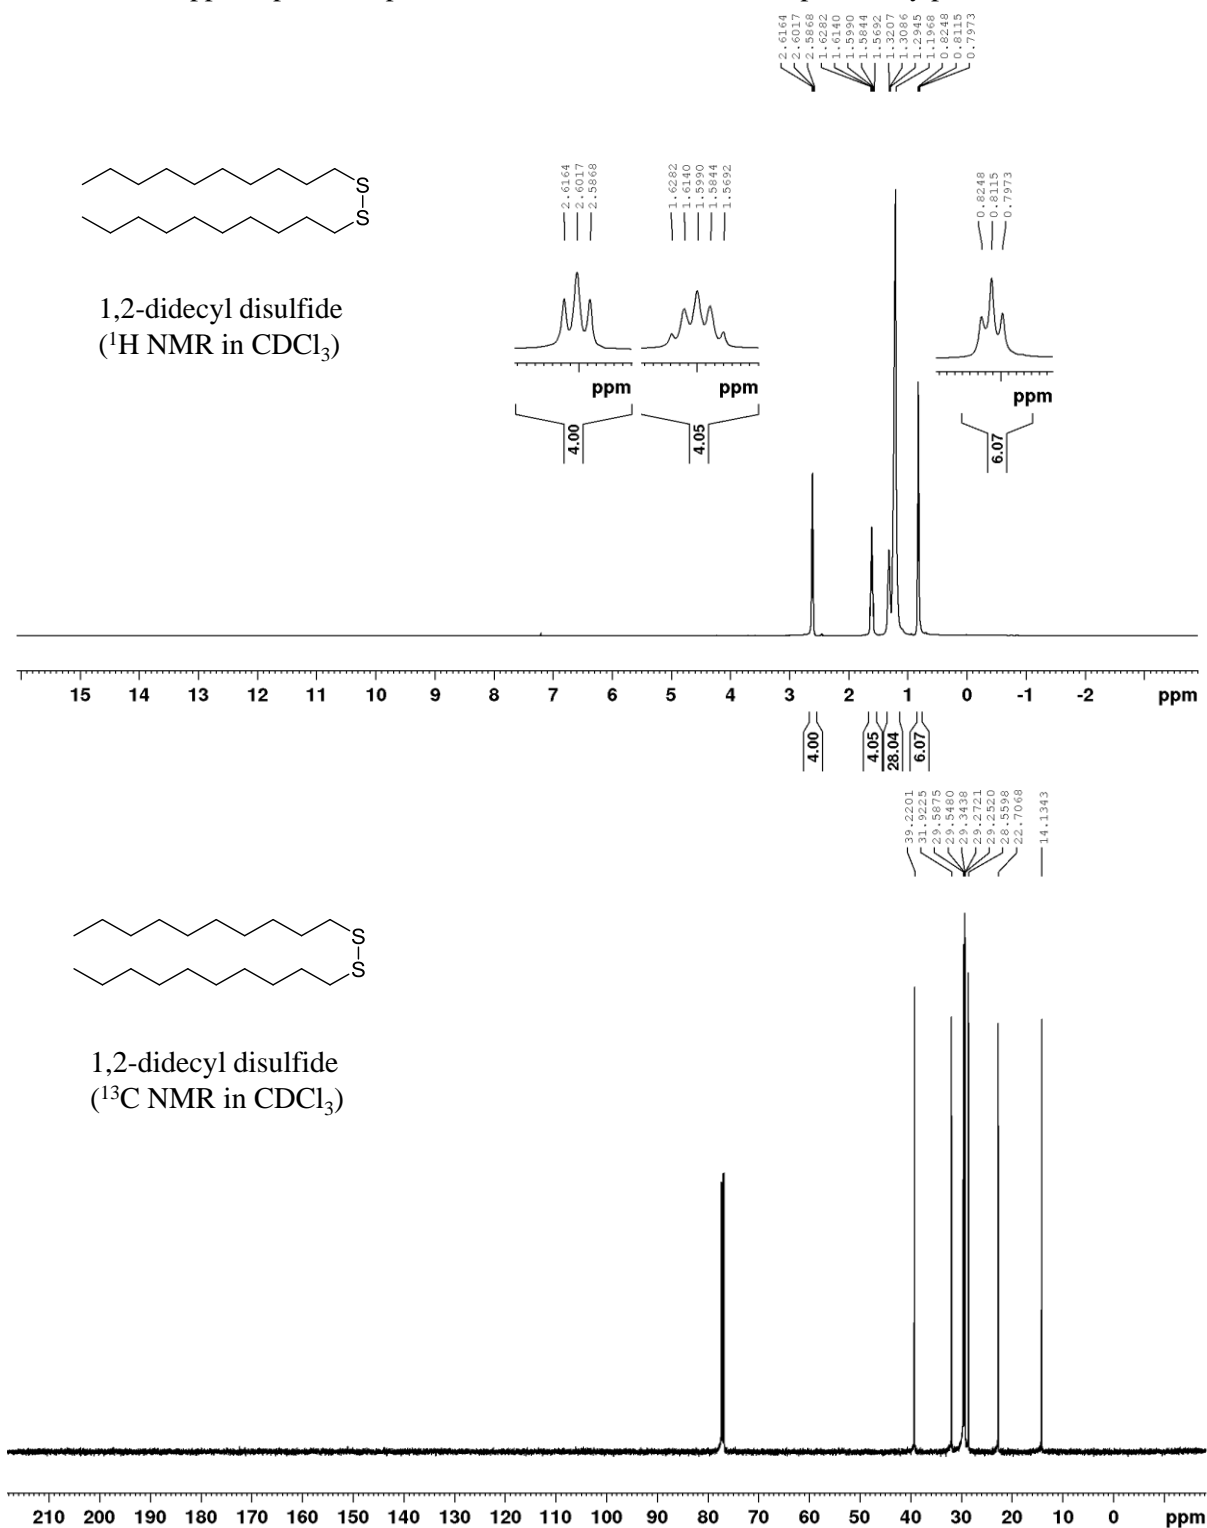

*1,2-dicyclohexyl disulfide (16b)*

Colorless oil; Yield in batch: 26.1 mg (99%) and 25.4 mg (96%) using **4** and **6**, respectively; Yield in flow: 25.9 mg (quant.) using **4**, respectively;  $^1\text{H}$  NMR ( $\text{CDCl}_3$ ):  $\delta$  = 2.72–2.69 (m, 2H), 2.08–2.02 (m, 4H), 1.84–1.77 (m, 4H), 1.65–1.63 (m, 2H), 1.38–1.25 ppm (m, 10H);  $^{13}\text{C}$  NMR ( $\text{CDCl}_3$ ):  $\delta$  = 50.0, 32.9, 26.1, 25.7 ppm. Spectroscopic data are in accordance with the previously presented.<sup>2</sup>

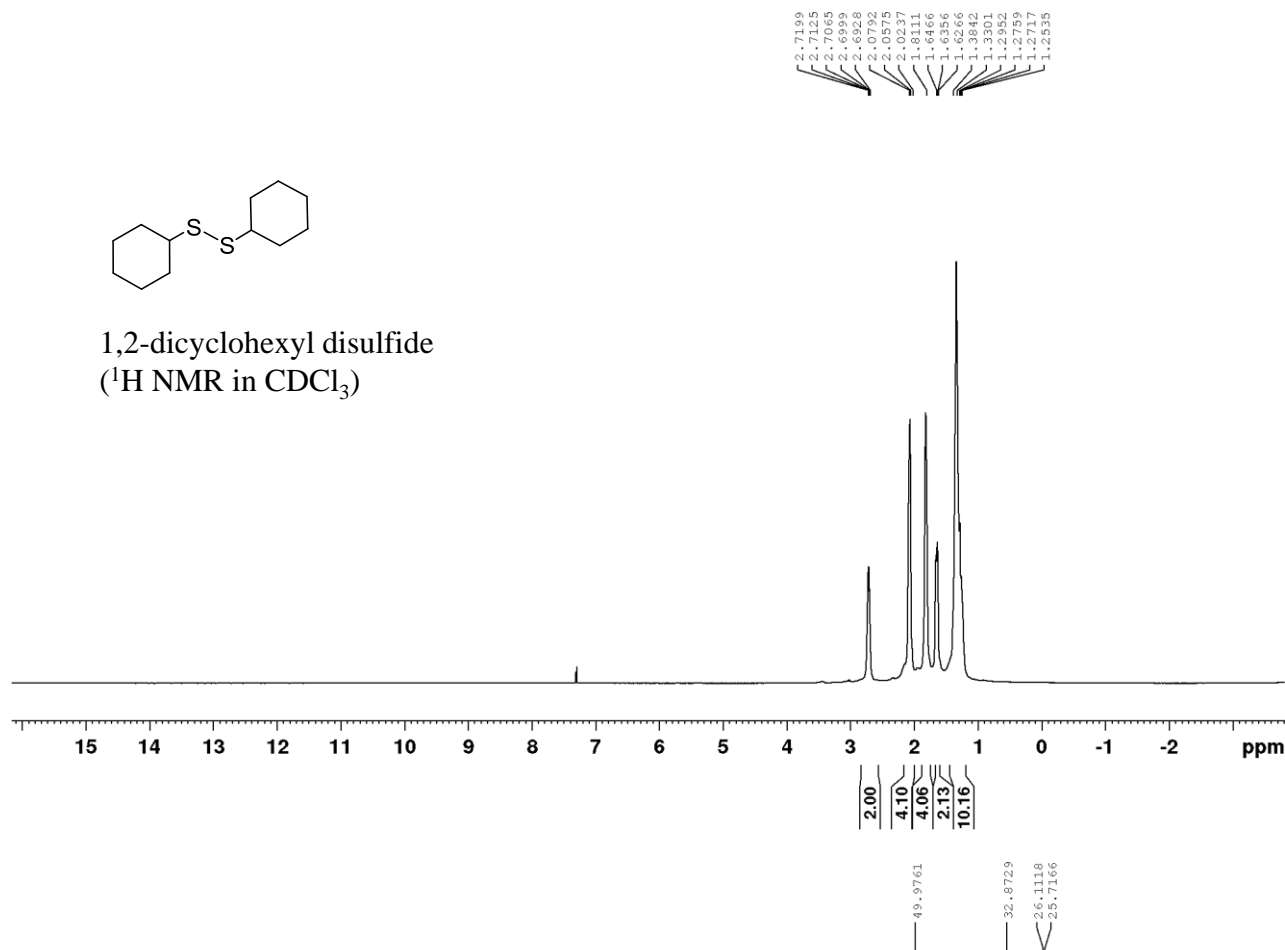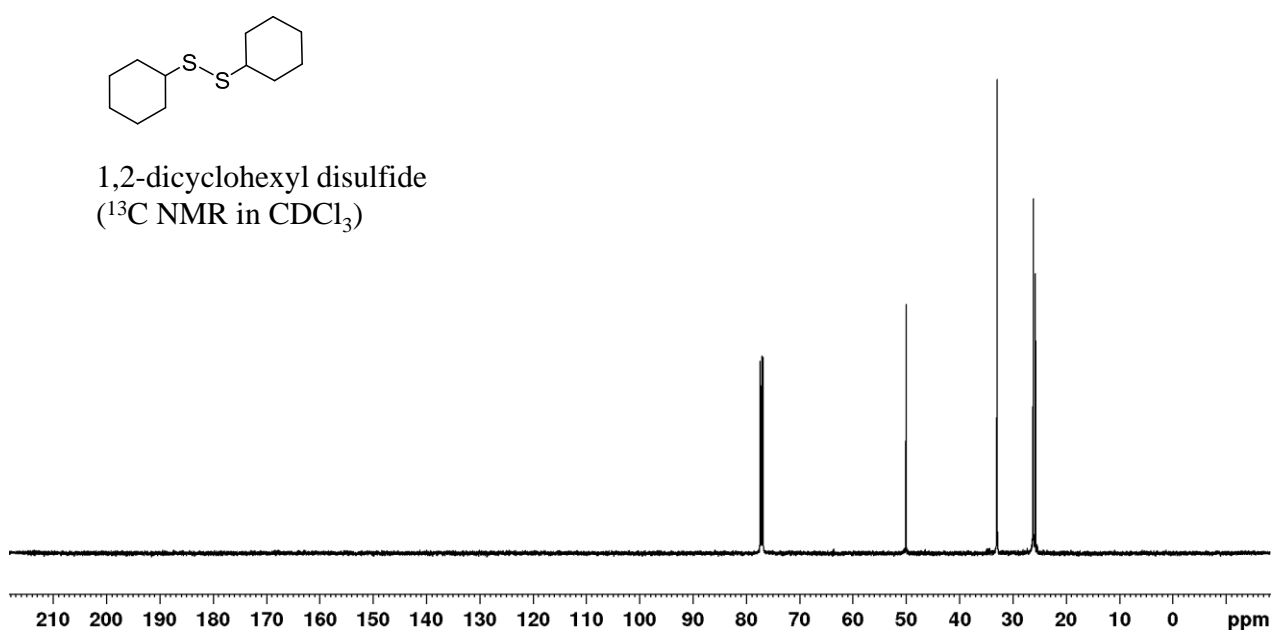



### 1,2-Diphenyl disulfide (**16c**)

White solid; Yield in batch: 23.4 mg (95%) and 29.3 mg (quant.) using **4** and **6**; Yield in flow: 23.6 mg (95%) and 23.9 mg (96%) using **4** and **5**, respectively;  $^1\text{H}$  NMR ( $\text{CDCl}_3$ ):  $\delta = 7.42\text{--}7.41$  (m, 4H),  $7.22\text{--}7.20$  (m, 4H),  $7.15\text{--}7.12$  ppm (m, 2H);  $^{13}\text{C}$  NMR ( $\text{CDCl}_3$ ):  $\delta = 137.1, 129.1, 127.5, 127.2$  ppm. Spectroscopic data are in accordance with the previously presented.<sup>3</sup>

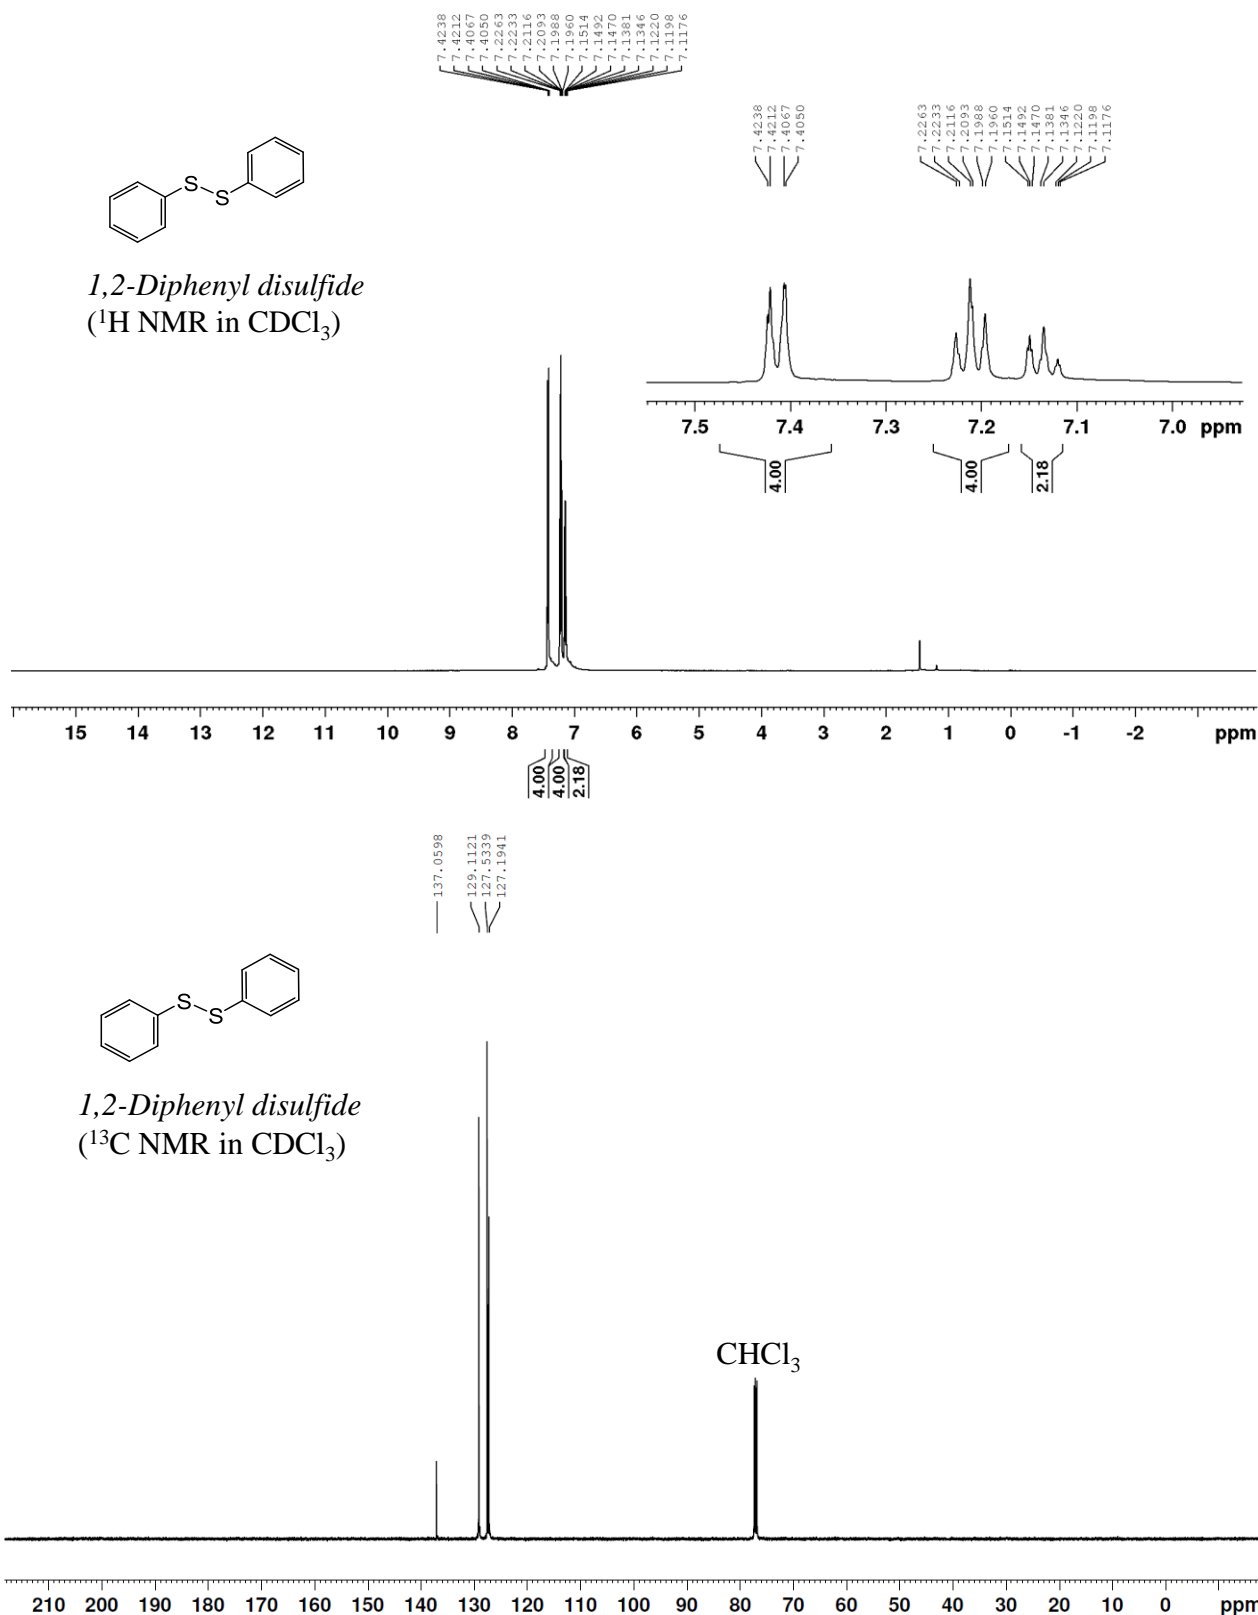

***Bis(4-methoxyphenyl) disulfide (16d)***

Off yellow oil; Yield in batch: 35.5 mg (quant.) and 30.4 mg (97%) using **4** and **6**, respectively; Yield in flow: 32.0 mg (quant.) and 30.4 mg (97%) using **4** and **5**, respectively;  $^1\text{H}$  NMR ( $\text{CDCl}_3$ ):  $\delta$  = 7.32–7.30 (m, 4H), 6.76–6.73 (m, 4H), 3.70 ppm (s, 6H);  $^{13}\text{C}$  NMR ( $\text{CDCl}_3$ ):  $\delta$  = 159.9, 132.7, 128.4, 114.6, 55.4 ppm. Spectroscopic data are in accordance with the previously presented.<sup>3</sup>

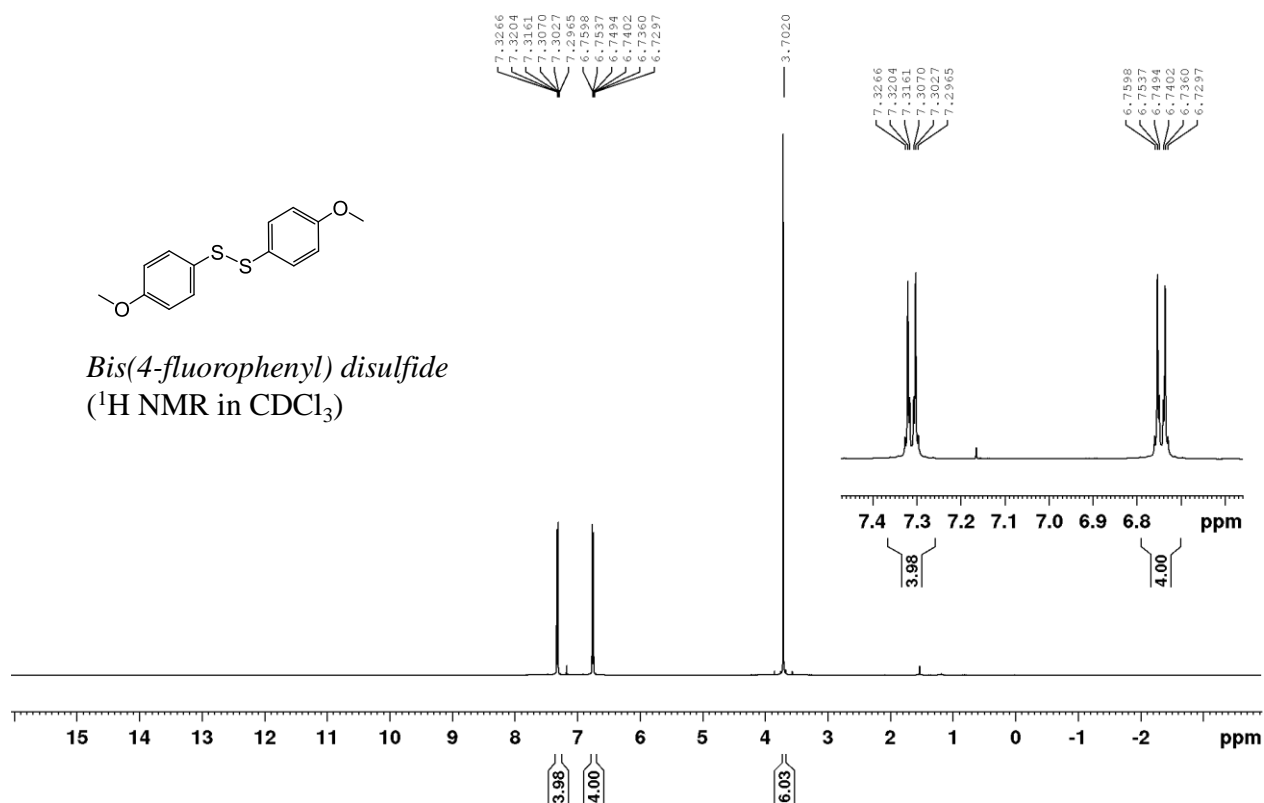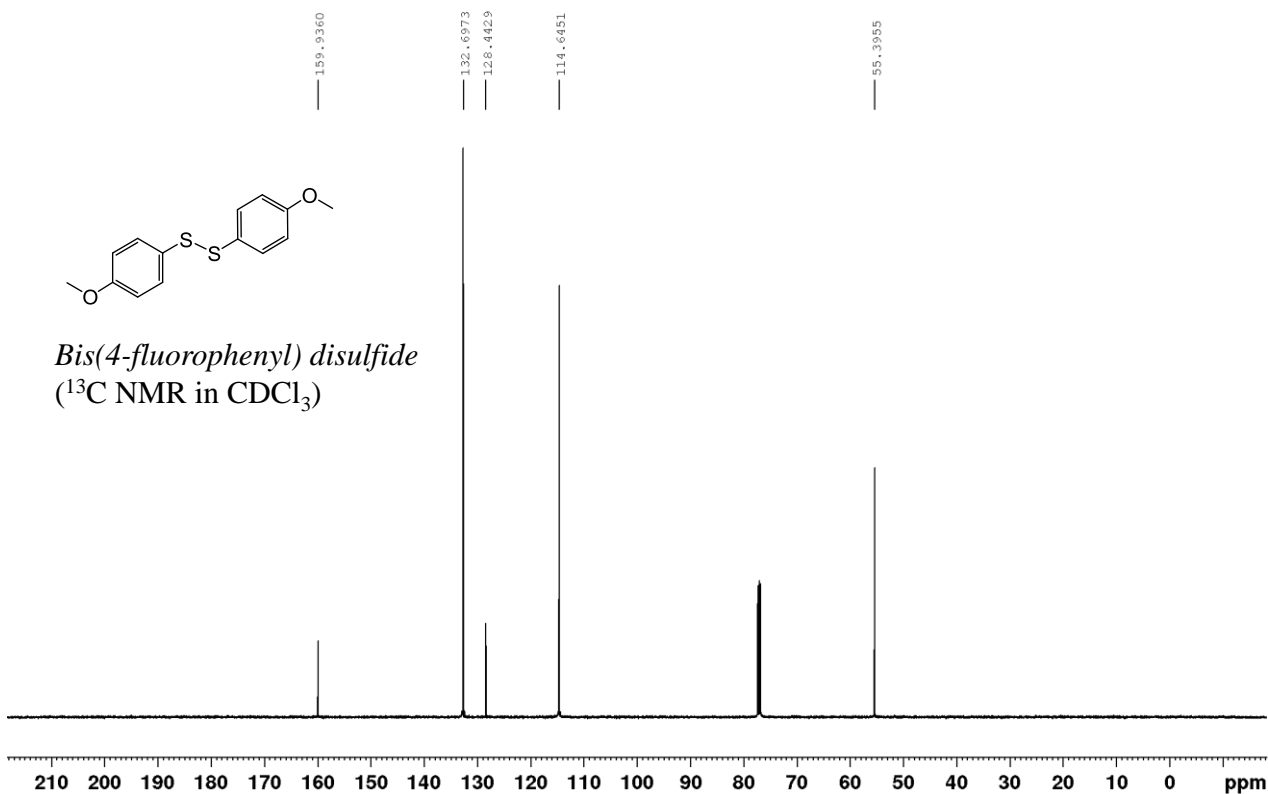

***Bis(4-methylphenyl) disulfide (16e)***

White solid; Yield in batch: 27.3 mg (98%) and 29.2 mg (quant.) using **4** and **6**, respectively; Yield in flow: 27.1 mg (97%) and 27.2 mg (97%) using **4** and **5**, respectively;  $^1\text{H}$  NMR ( $\text{CDCl}_3$ ):  $\delta$  = 7.44–7.14 (m, 4H), 7.15 (d,  $J$  = 8.1, Hz, 4H), 2.37 ppm (s, 6H);  $^{13}\text{C}$  NMR ( $\text{CDCl}_3$ ):  $\delta$  = 137.5, 133.9, 129.8, 128.6, 21.1 ppm. Spectroscopic data are in accordance with the previously presented.<sup>1</sup>

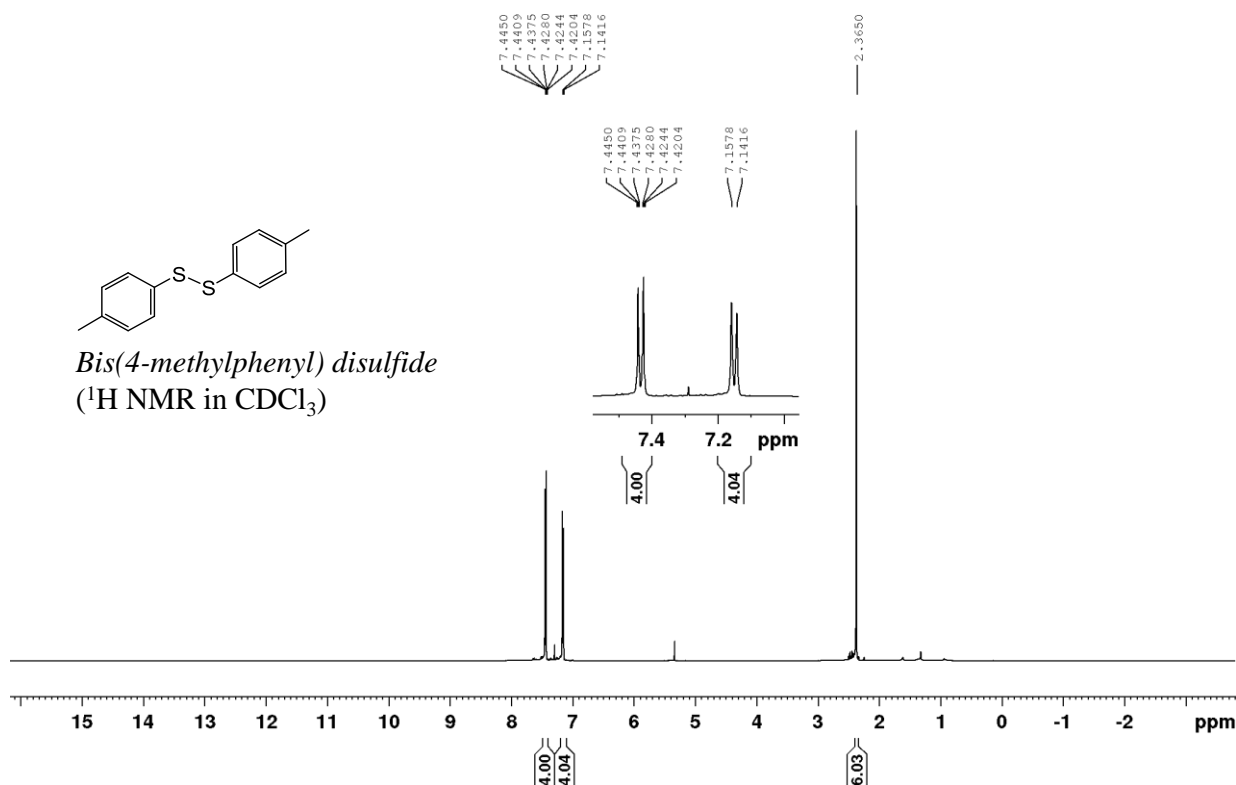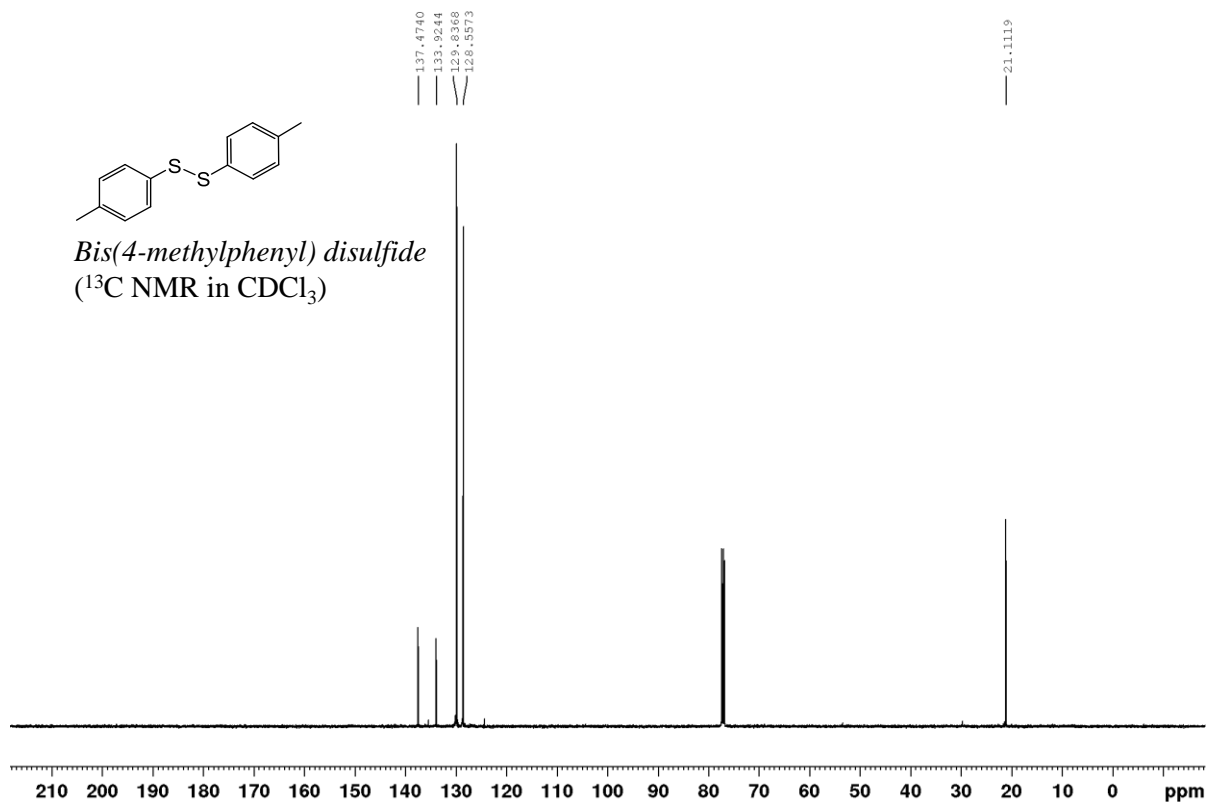

*1,2-bis(4-(tert-butyl)phenyl) disulfide (16f)*

White solid; Yield in batch: 37.4 mg (quant.) and 35.9 mg (96%) using **4** and **6**, respectively; Yield in flow: 37.6 mg (quant.) and 34.8 mg (93%) using **4** and **5**, respectively;  $^1\text{H}$  NMR ( $\text{CDCl}_3$ ):  $\delta$  = 7.51–7.49 (m, 4H), 7.39–7.37 (m, 4H), 1.35 ppm (m, 18H);  $^{13}\text{C}$  NMR ( $\text{CDCl}_3$ ):  $\delta$  = 150.5, 134.1, 127.8, 126.2, 34.6, 31.3 ppm. Spectroscopic data are in accordance with the previously presented.<sup>4</sup>

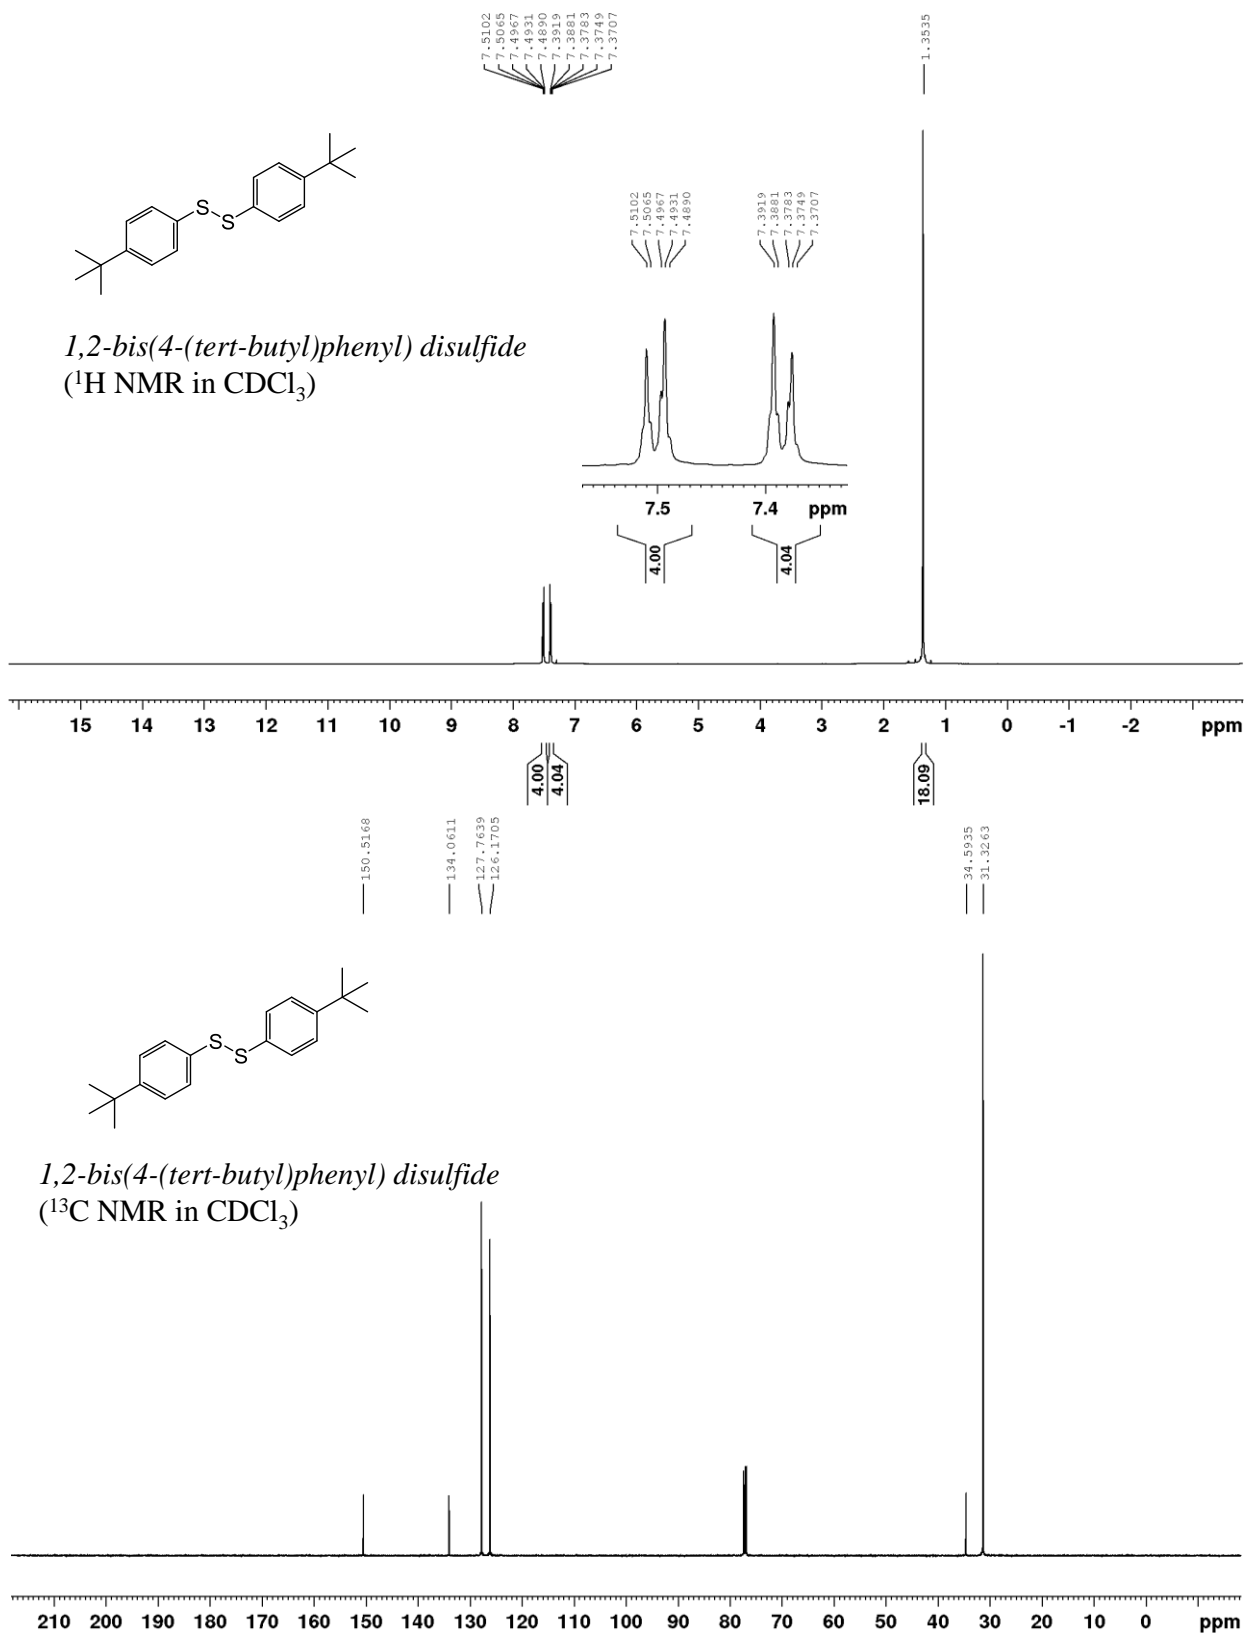

**Bis(4-fluorophenyl) disulfide (16g)**

Colorless oil; Yield in batch: 29.0 mg (quant.) and 28.2 mg (99%) using **4** and **6**, respectively, respectively; Yield in flow: 29.0 mg (quant.) and 27.9 mg (97%) using **4** and **5**, respectively;  $^1\text{H}$  NMR ( $\text{CDCl}_3$ ):  $\delta$  = 7.38–7.34 (m, 4H), 6.95–6.90 (m, 4H);  $^{13}\text{C}$  NMR ( $\text{CDCl}_3$ ):  $\delta$  = 163.62, 161.64, 132.19 (d,  $J$  = 3.4 Hz), 131.30 (d,  $J$  = 8.8 Hz), 116.31 ppm (d,  $J$  = 22.6 Hz). Spectroscopic data are in accordance with the previously presented.<sup>1</sup>

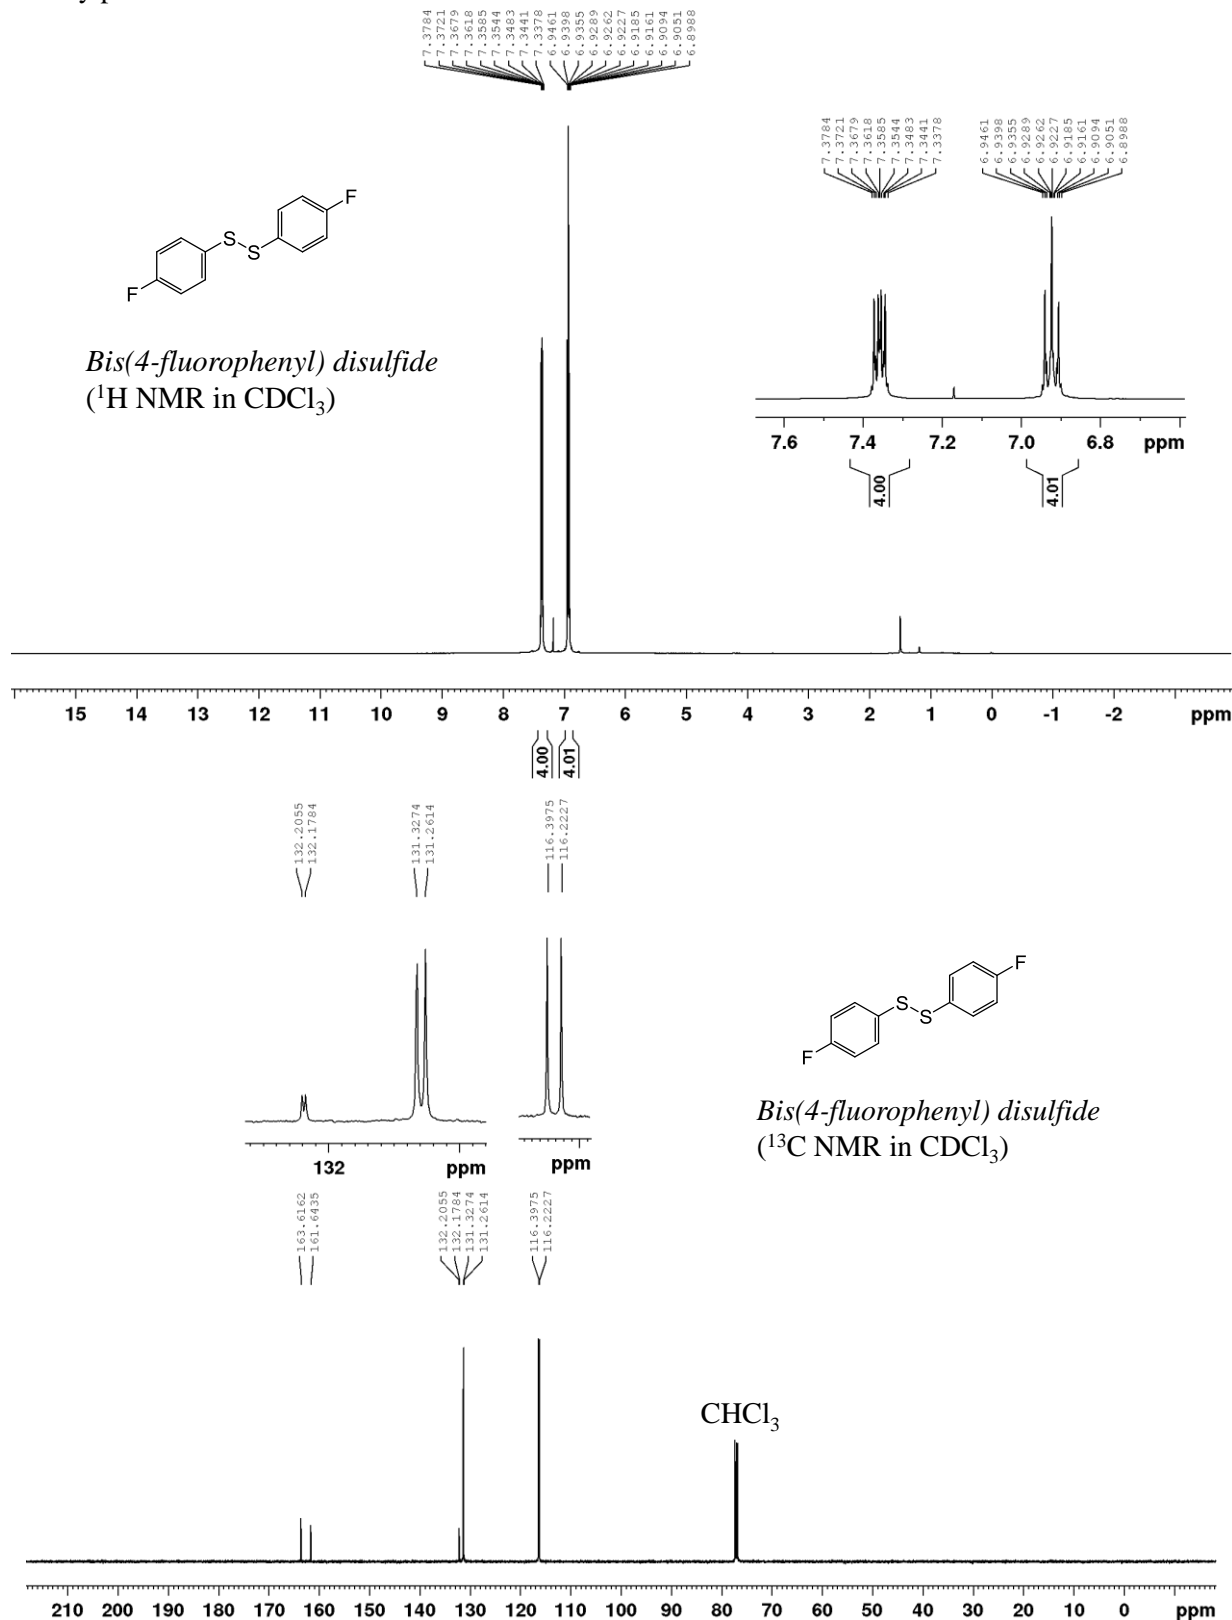

***Bis(4-chlorophenyl) disulfide (16h)***

White solid; Yield in batch: 33.5 mg (quant.) and 34.6 mg (quant.) using **4** and **6**, respectively; Yield in flow: 31.5 mg (97%) and 31.0 mg (95%) using **4** and **5**, respectively;  $^1\text{H}$  NMR ( $\text{CDCl}_3$ ):  $\delta = 7.33\text{--}7.30$  (m, 4H), 7.20–7.17 ppm (m, 4H);  $^{13}\text{C}$  NMR ( $\text{CDCl}_3$ ):  $\delta = 135.2, 133.7, 129.3$  ppm. Spectroscopic data are in accordance with the previously presented.<sup>1</sup>

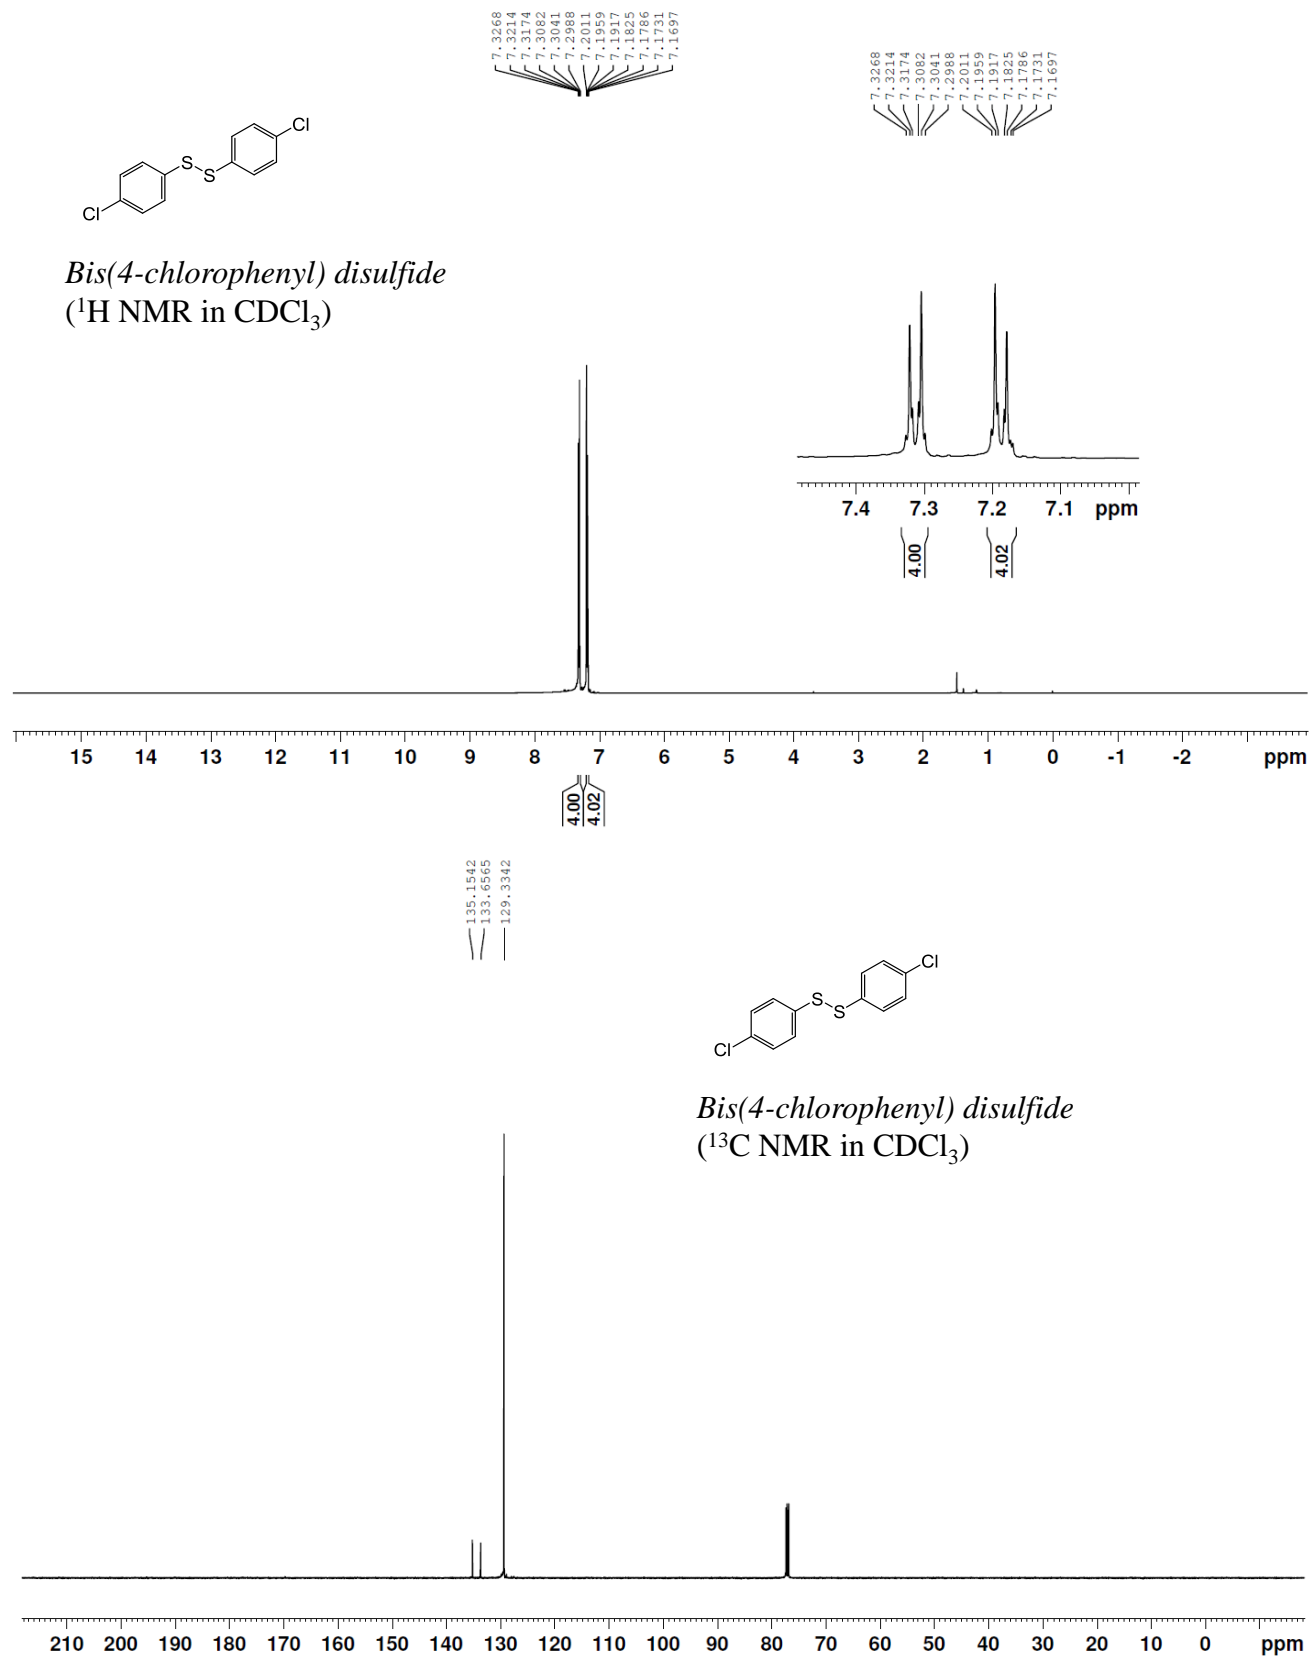

*Bis(4-bromophenyl) disulfide (16i)*

White solid; Yield in batch: 43.2 mg (quant.) and 41.1 mg (97%) using **4** and **6**, respectively; Yield in flow: 41.9 mg (99%) and 41.7 mg (98%) using **4** and **5**, respectively;  $^1\text{H}$  NMR ( $\text{CDCl}_3$ ):  $\delta = 7.35\text{--}7.32$  (m, 1H), 7.25–7.24 ppm (m, 1H);  $^{13}\text{C}$  NMR ( $\text{CDCl}_3$ ):  $\delta = 135.8, 132.3, 129.4, 121.6$  ppm. Spectroscopic data are in accordance with the previously presented.<sup>1</sup>

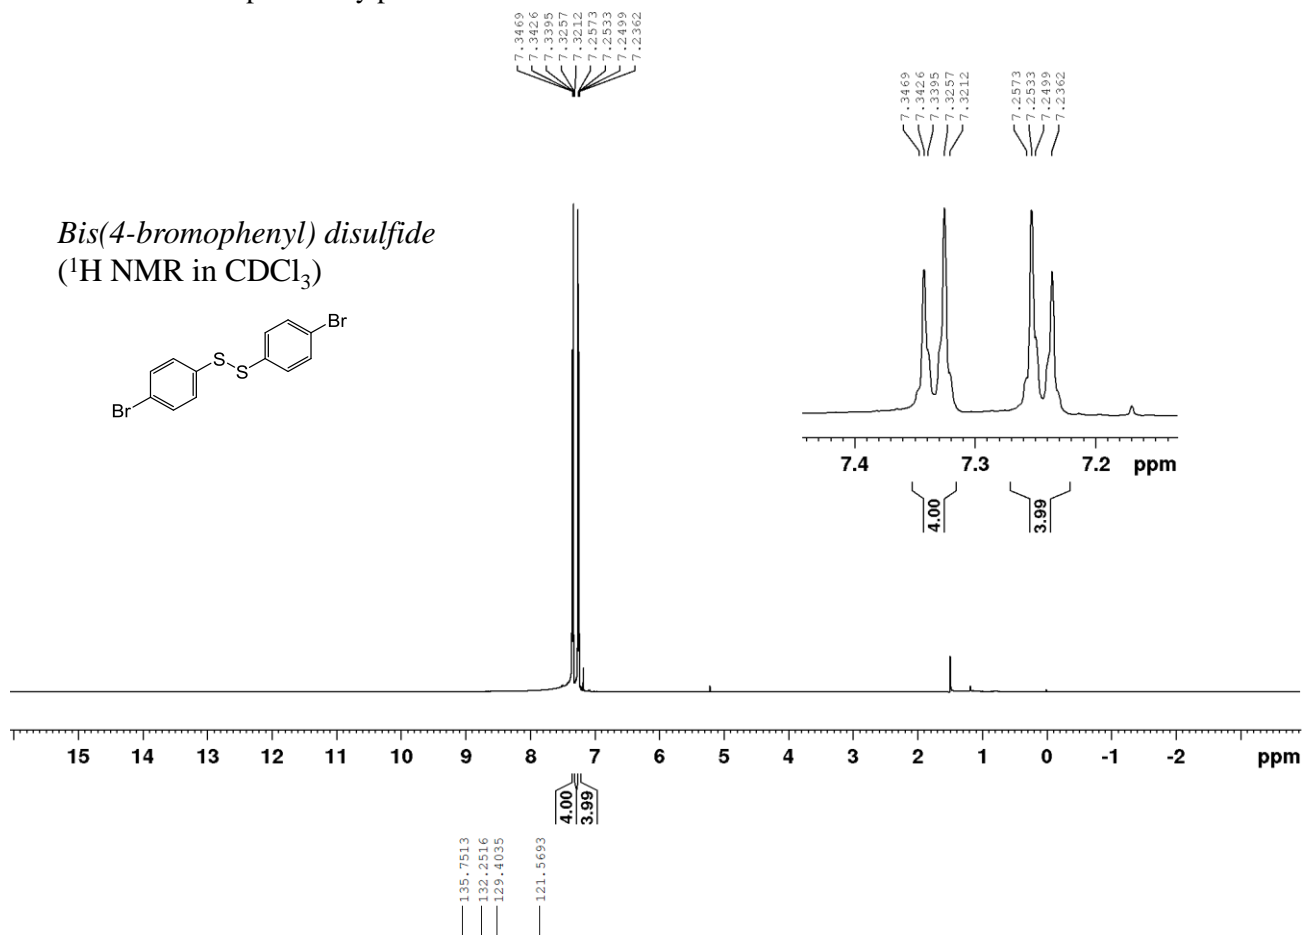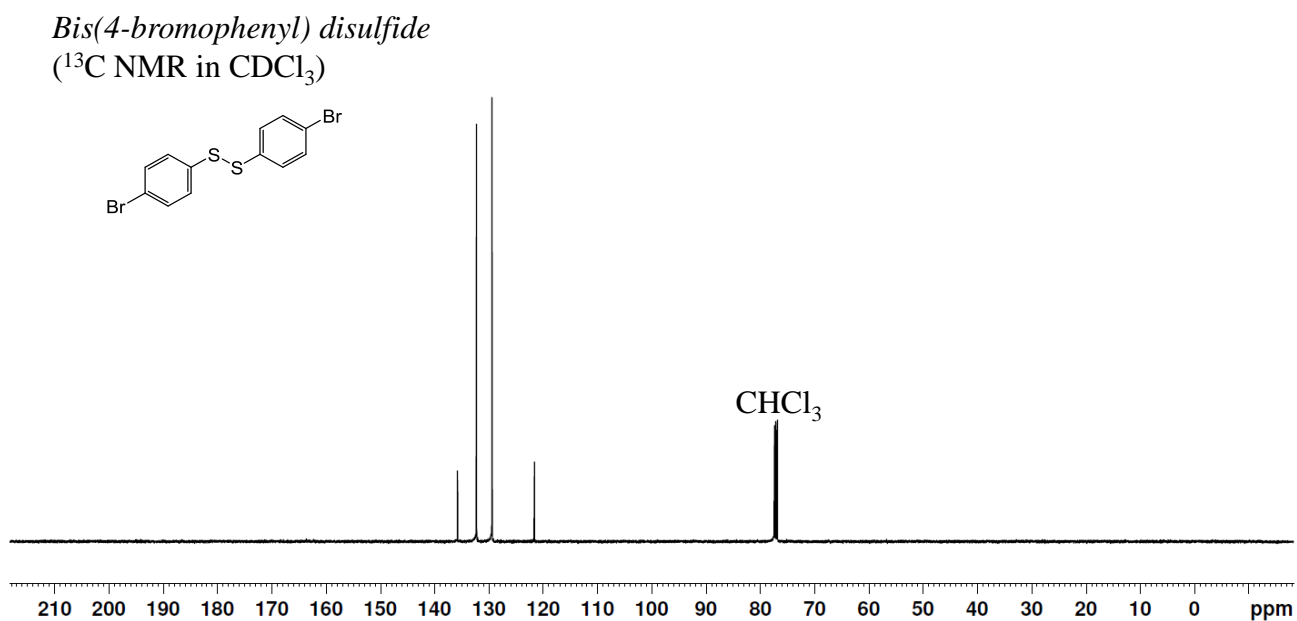

*Bis(phenylmethyl) disulfide (16j)*

White solid; Yield in batch: 26.3 mg (97%) and 29.3 mg (quant.) using **4** and **6**, respectively; Yield in flow: 27.5 mg (99%) and 27.5 mg (99%) using **4** and **5**, respectively;  $^1\text{H}$  NMR ( $\text{CDCl}_3$ ):  $\delta = 7.26\text{--}7.15$  (m, 10H), 3.51 ppm (s, 4H);  $^{13}\text{C}$  NMR ( $\text{CDCl}_3$ ):  $\delta = 137.4, 129.5, 128.5, 127.5, 43.3$  ppm. Spectroscopic data are in accordance with the previously presented.<sup>1</sup>

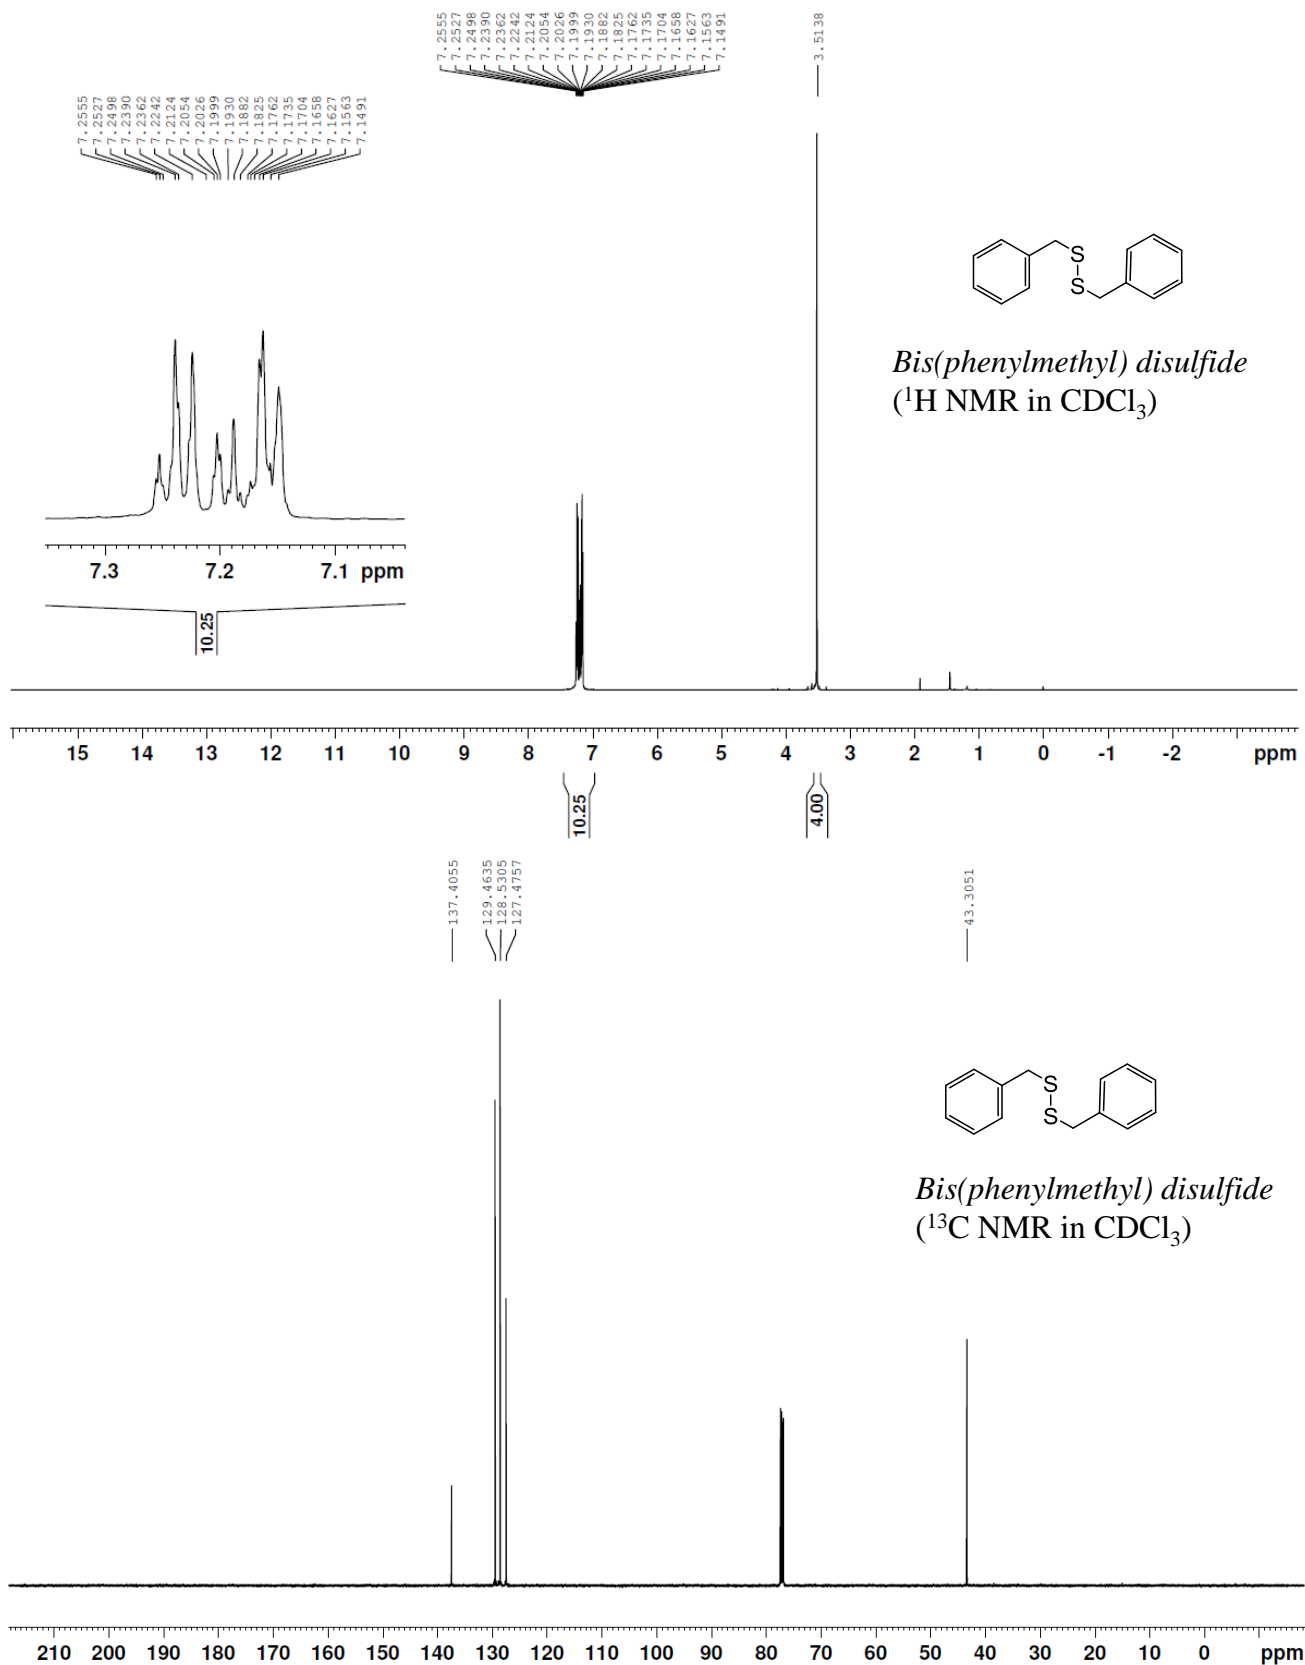



**4,4'-Dipyridyl disulfide dihydrochloride (16k)**

Off yellow solid; Yield in batch: 33.5 mg (quant.) using **7**; Yield in flow: 33.3 mg (quant.) using **7**;  $^1\text{H}$  NMR ( $\text{D}_2\text{O}$ ):  $\delta = 8.53\text{--}8.52$  (m, 4H),  $8.08\text{--}8.06$  ppm (m, 4H);  $^{13}\text{C}$  NMR ( $\text{D}_2\text{O}$ ):  $\delta = 159.6, 140.6, 123.3$  ppm. HRMS (ESI+):  $m/z$  calcd for  $\text{C}_{10}\text{H}_9\text{N}_2\text{S}_2^+$ : 221.0202  $[\text{M}+\text{H}-2\text{HCl}]^+$ ; found: 221.0205.

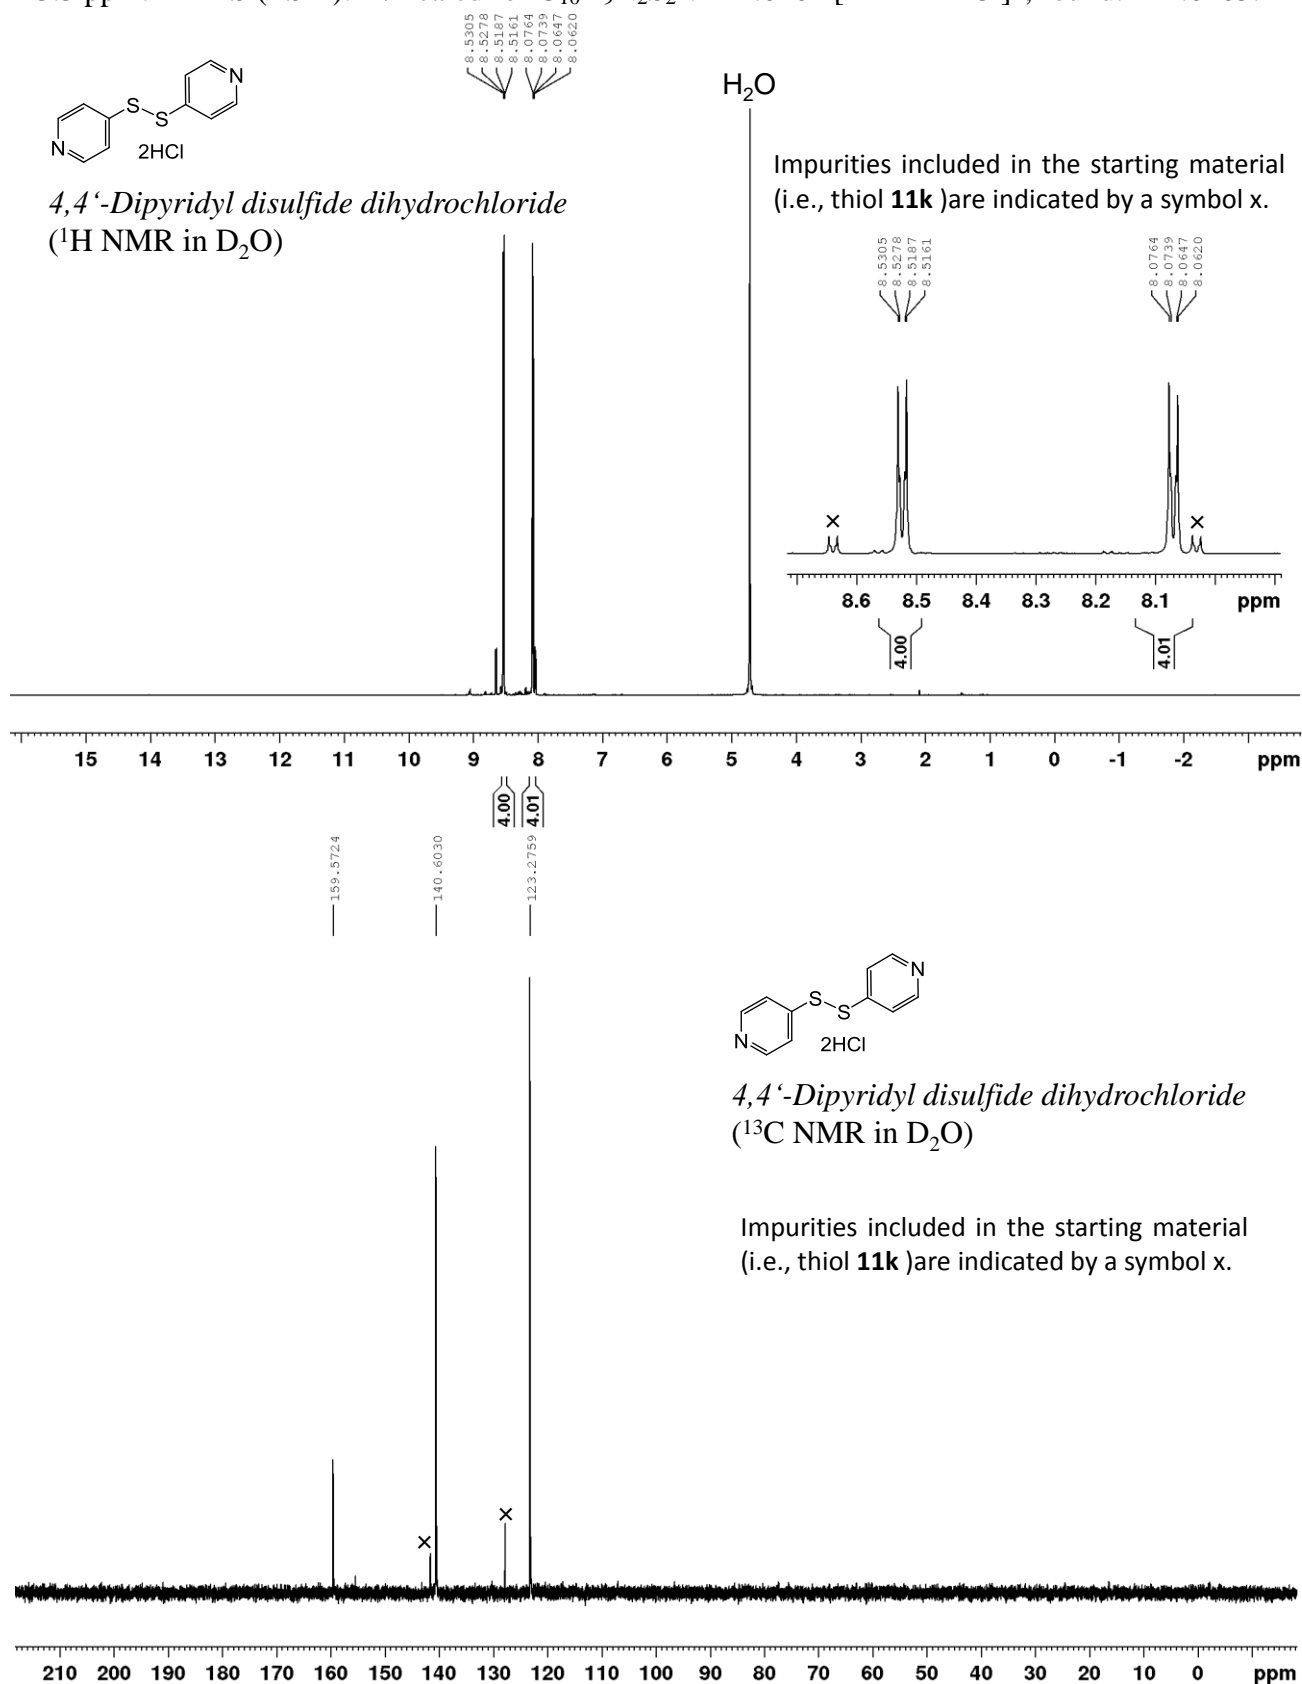

*N*-(*tert*-Butoxycarbonyl)-*L*-cysteine methyl ester (**16l**)

Colorless oil; Yield in batch: 54.2 mg (quant.) and 47.1 mg (89%) using **4** and **6**, respectively; Yield in flow: 50.7 mg (96%) and 51.2 mg (97%) using **4** and **5**, respectively;  $^1\text{H}$  NMR ( $\text{CDCl}_3$ ):  $\delta$  = 5.43 (br d,  $J$  = 7.0 Hz, 2H), 4.62–4.58 (m, 2H), 3.77 (s, 6H), 3.17–3.13 (m, 4H), 1.45 ppm (s, 18H);  $^{13}\text{C}$  NMR ( $\text{CDCl}_3$ ):  $\delta$  = 171.2, 155.1, 80.3, 52.8, 52.7, 41.2, 28.3 ppm; LRMS (APCI+):  $m/z$  calcd for  $\text{C}_{18}\text{H}_{33}\text{N}_2\text{O}_8\text{S}_2^+$ : 469.17  $[\text{M}+\text{H}]^+$ ; found: 469.19. Spectroscopic data are in accordance with the previously presented.<sup>5</sup>

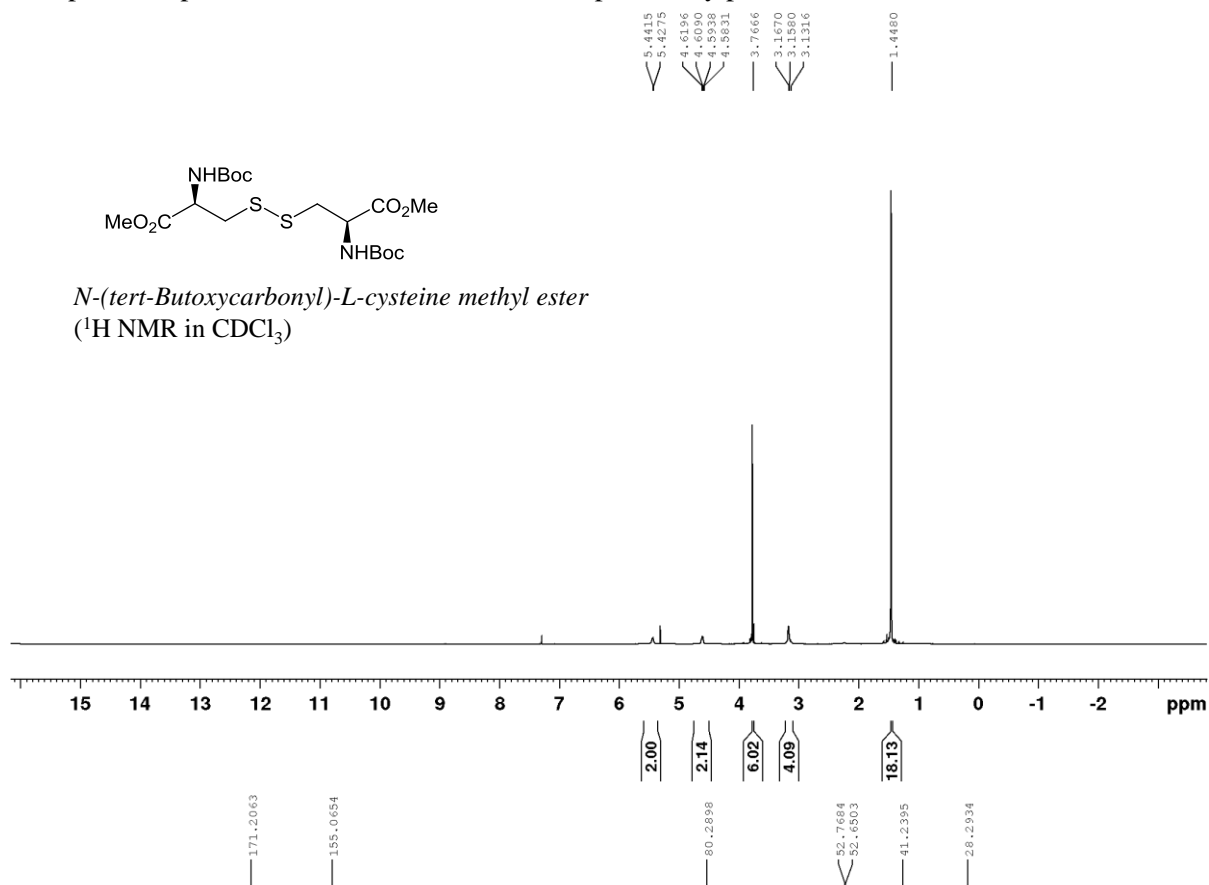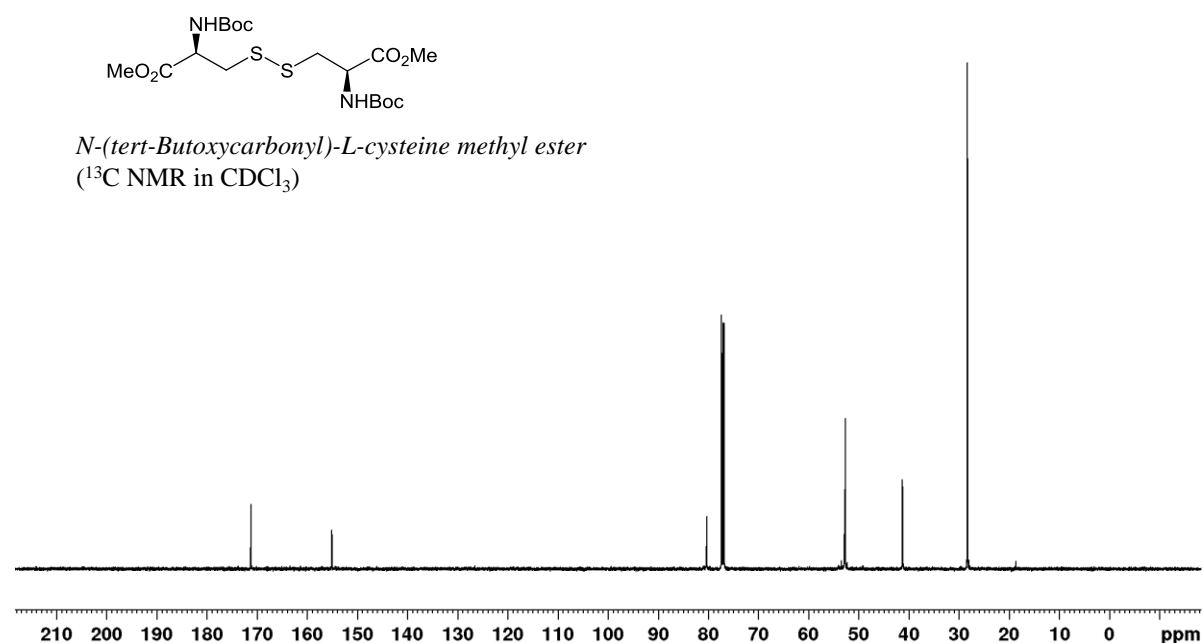

*N*-Acetyl-L-cysteine methyl ester (**16m**)

White solid; Yield in batch: 28.6 mg (72%) and 30.9 mg (78%) using **4** and **6**, respectively; Yield in flow: 28.5 mg (71%) and 27.0 mg (68%) using **4** and **5**, respectively;  $^1\text{H}$  NMR ( $\text{CDCl}_3$ ):  $\delta$  = 6.65 (d,  $J$  = 7.45 Hz, 2H), 4.82–4.79 (m, 2H), 3.71 (s, 6H), 3.17–3.10 (m, 4H), 2.00 ppm (s, 6H);  $^{13}\text{C}$  NMR ( $\text{CDCl}_3$ ):  $\delta$  = 170.9, 170.2, 52.8, 51.7, 40.7, 23.1 ppm; LRMS (APCI $^+$ ):  $m/z$  calcd for  $\text{C}_{12}\text{H}_{21}\text{N}_2\text{O}_6\text{S}_2^+$ : 353.08  $[\text{M}+\text{H}]^+$ ; found: 353.10.<sup>6</sup>

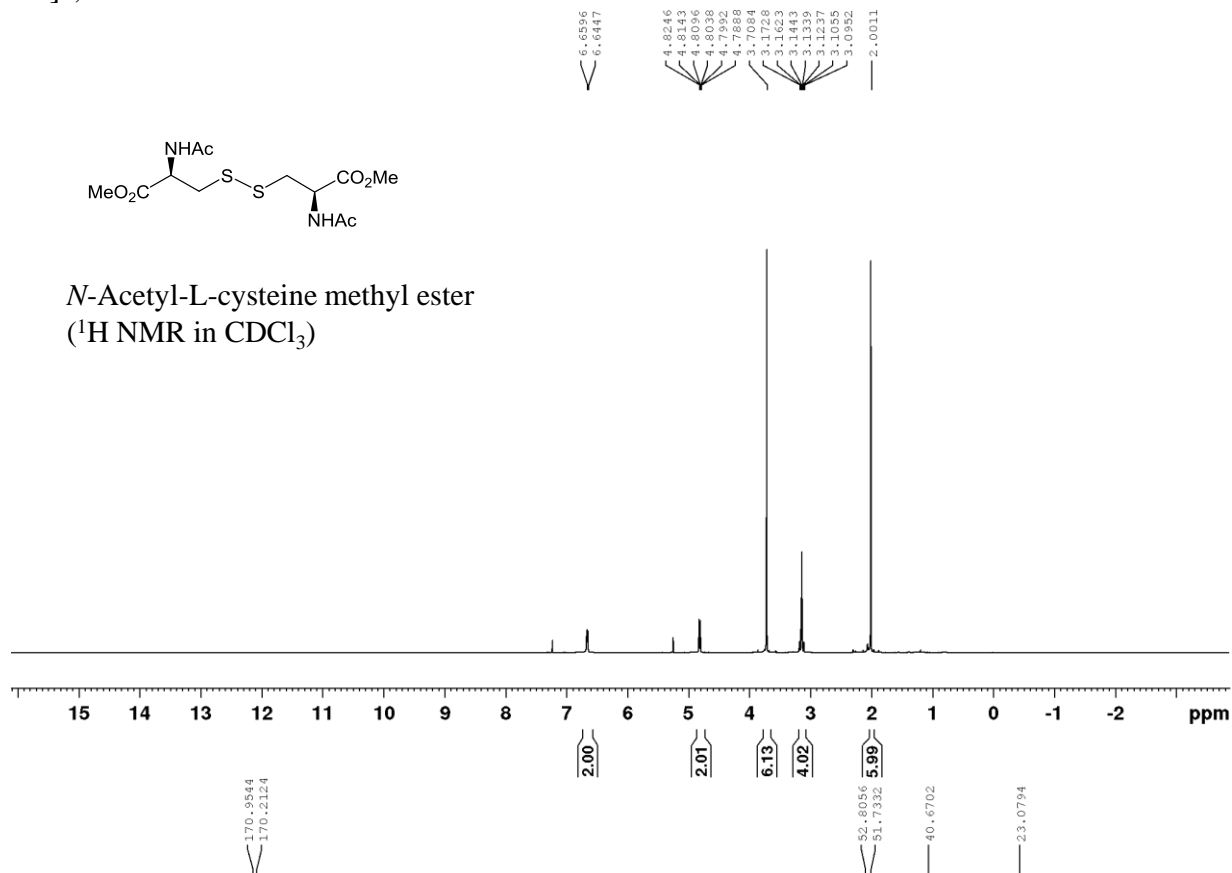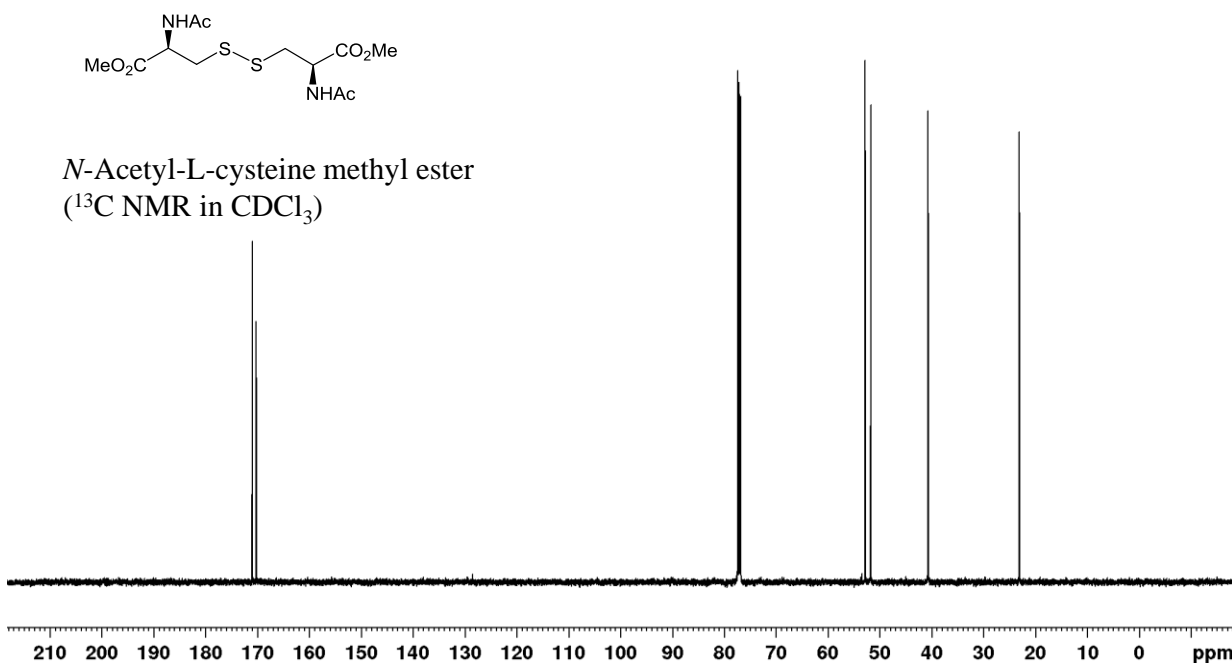

*Dimethyl 3,3'-disulfanediyl dipropionate (16n)*

Colorless liquid; Yield in batch: 26.6 mg (92%) and 21.5 mg (79%) using **4** and **6**, respectively; Yield in flow: 26.4 mg (98%) and 27.5 mg (quant) using **4** and **5**, respectively;  $^1\text{H}$  NMR ( $\text{CDCl}_3$ ):  $\delta$  = 3.64 (s, 6H), 2.86 (t,  $J$  = 7.2 Hz, 4H), 2.68 ppm (t,  $J$  = 7.2 Hz, 4H);  $^{13}\text{C}$  NMR ( $\text{CDCl}_3$ ):  $\delta$  = 172.1, 51.9, 33.9, 33.1 ppm; LRMS (APCI+):  $m/z$  calcd for  $\text{C}_8\text{H}_{15}\text{O}_4\text{S}_2^+$ : 239.04  $[\text{M}-\text{H}]^+$ ; found: 239.04. Spectroscopic data are in accordance with the previously presented.<sup>7</sup>

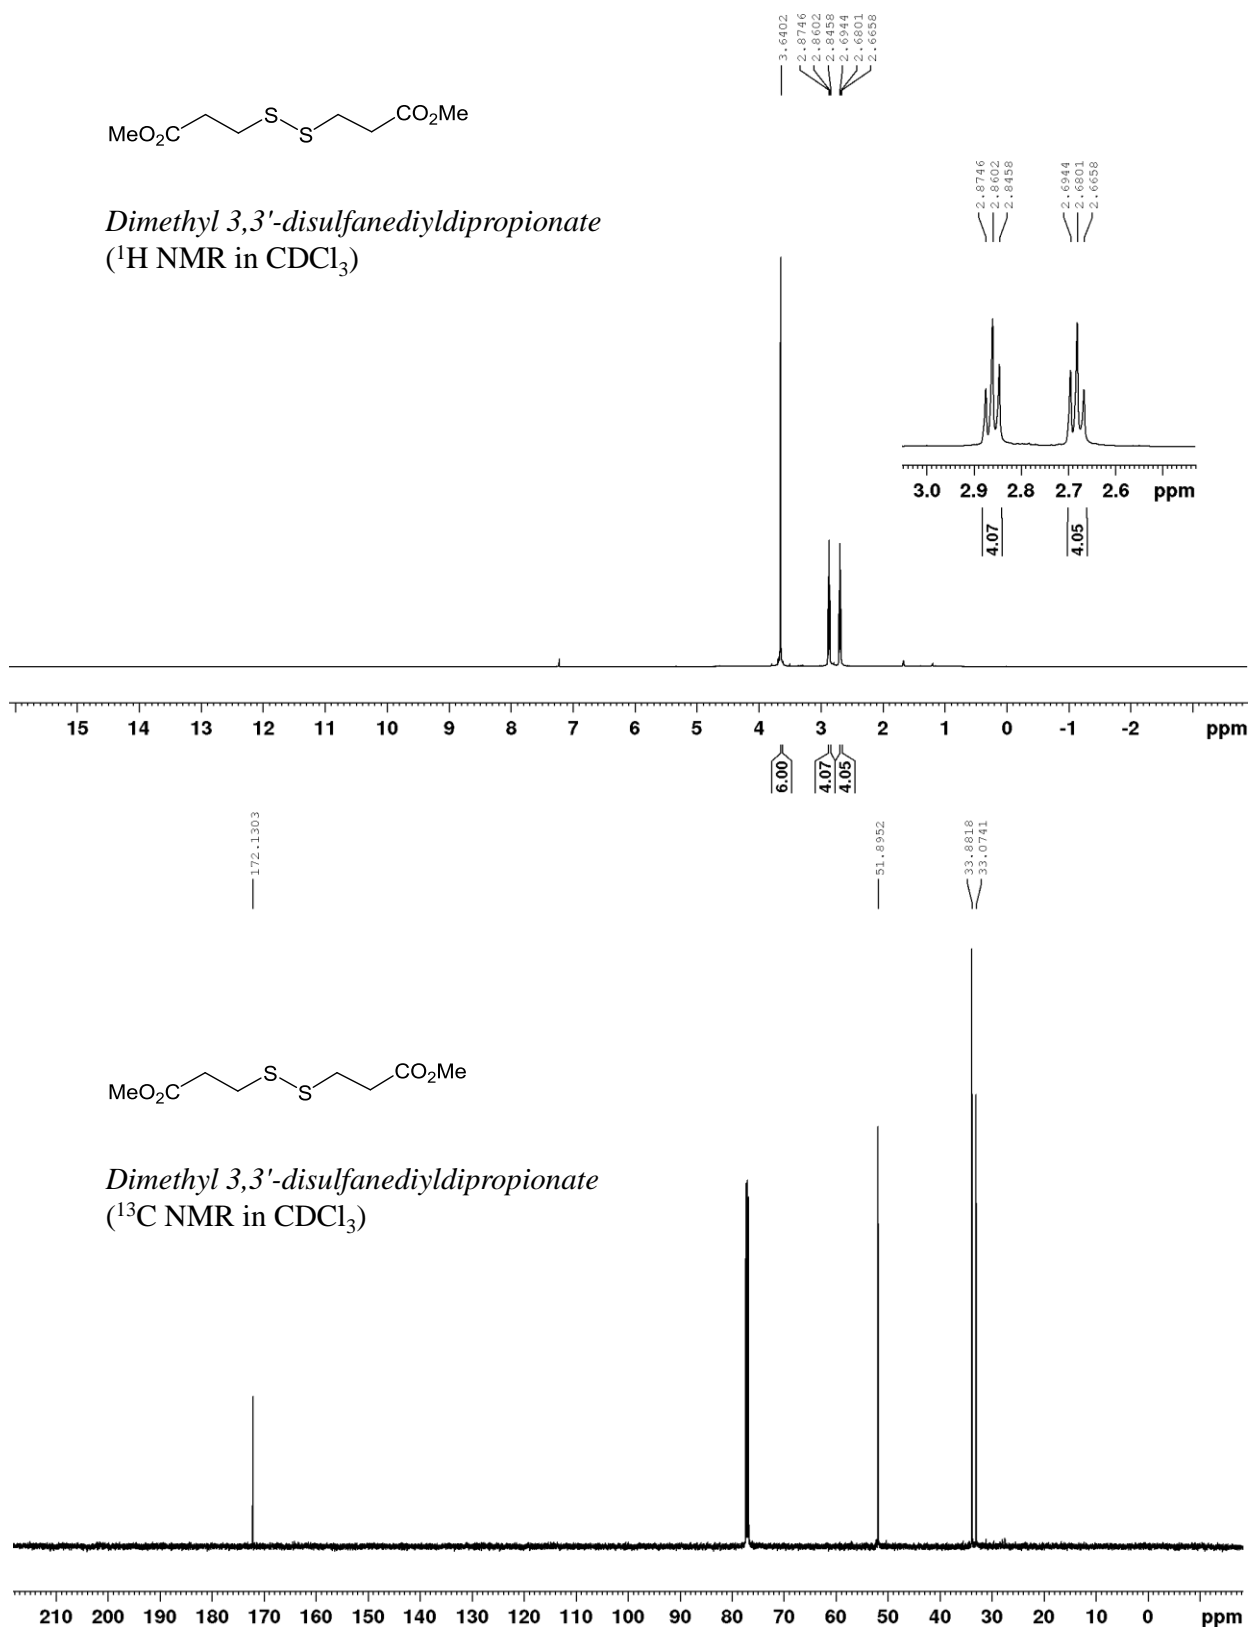

*Di-tert-butyl (disulfanediyldis(ethane-2,1-diyl))dicarbamate (16o)*

White solid; Yield in batch: 38.5 mg (95%) and 31.5 mg (80%) using **4** and **6**, respectively; Yield in flow: 37.0 mg (93%) and 37.2 mg (93%) using **4** and **5**, respectively;  $^1\text{H}$  NMR ( $\text{CDCl}_3$ ):  $\delta$  = 5.06 (br s, 2H), 3.38 (q,  $J$  = 6.0 Hz, 4H), 2.73 (t,  $J$  = 6.3 Hz, 4H), 1.38 (s, 18H) ppm;  $^{13}\text{C}$  NMR ( $\text{CDCl}_3$ ):  $\delta$  = 155.8, 79.5, 39.3, 38.5, 28.4 ppm; LRMS (APCI+):  $m/z$  calcd for  $\text{C}_{14}\text{H}_{29}\text{N}_2\text{O}_4\text{S}_2^+$ : 353.16  $[\text{M}-\text{H}]^+$ ; found: 353.15. Spectroscopic data are in accordance with the previously presented.<sup>8</sup>

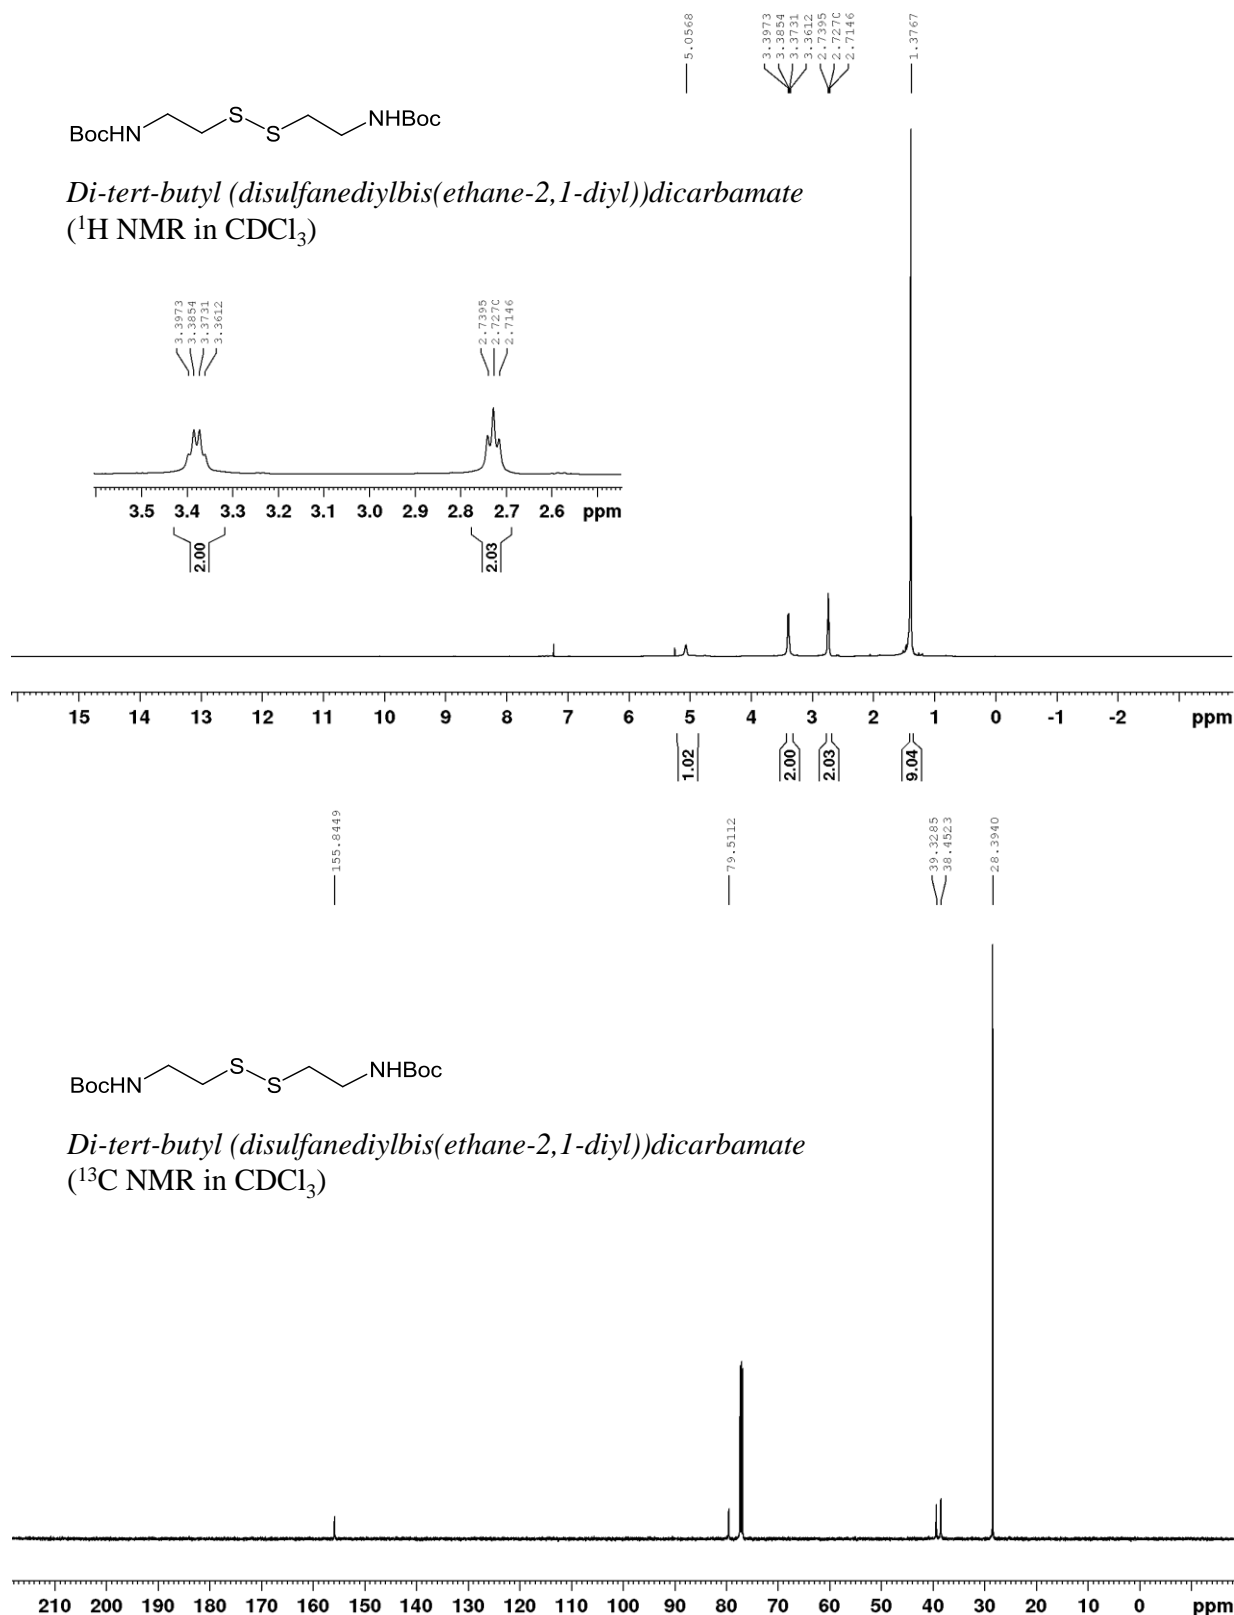

*L*-Cystine dihydrochloride (**16p**)

White solid; Yield in batch: 33.2 mg (94%); Yield in flow: 35.5 mg (quant.);  $^1\text{H}$  NMR ( $\text{D}_2\text{O}$ ):  $\delta$  = 4.35 (dd,  $J$  = 4.2, 8.0 Hz, 2H), 3.32 (dd,  $J$  = 4.3, 15.2 Hz, 2H), 3.16 ppm (dd,  $J$  = 8.0, 15.3 Hz, 2H);  $^{13}\text{C}$  NMR ( $\text{D}_2\text{O}$ ):  $\delta$  = 170.5, 51.8, 36.4 ppm; LRMS (APCI+):  $m/z$  calcd for  $\text{C}_6\text{H}_{13}\text{N}_2\text{O}_4\text{S}_2^+$ : 241.03  $[\text{M}+\text{H}-2\text{HCl}]^+$ ; found: 241.06. Spectroscopic data are in accordance with the previously presented.<sup>9</sup>

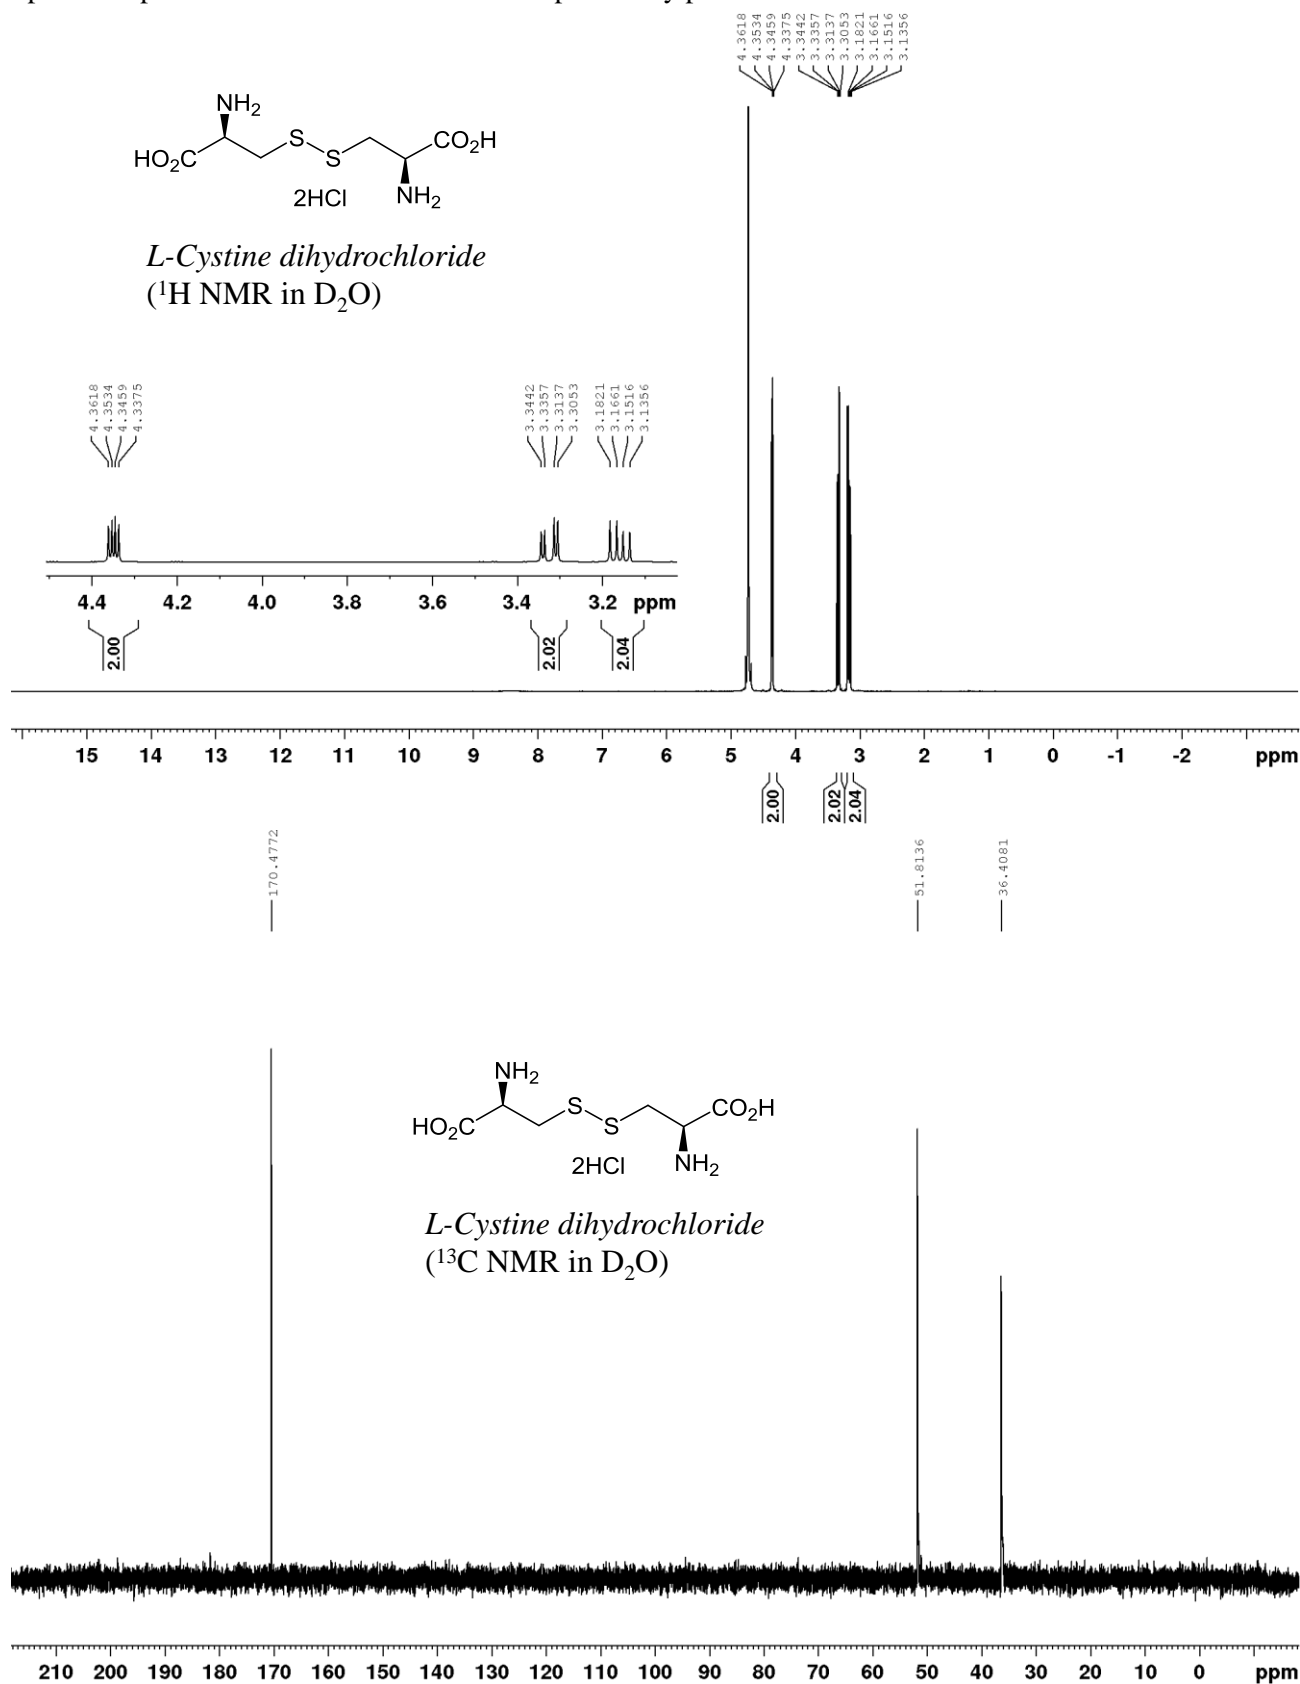

**3,3'-Dithiodipropionic acid (16q)**

White solid; Yield in batch: 23.2 mg (98%); Yield in flow: 23.1 mg (98%);  $^1\text{H}$  NMR ( $\text{CD}_3\text{OD}$ ):  $\delta$  = 4.94 (br s, 1H), 2.95 (t,  $J$  = 7.1 Hz, 4H), 2.74 ppm (t,  $J$  = 6.9 Hz, 4H);  $^{13}\text{C}$  NMR ( $\text{CD}_3\text{OD}$ ):  $\delta$  = 173.9, 33.4, 32.9 ppm; LRMS (APCI $^-$ ):  $m/z$  calcd for  $\text{C}_6\text{H}_9\text{O}_4\text{S}_2^-$ : 208.99  $[\text{M}-\text{H}]^+$ ; found: 208.98. Spectroscopic data are in accordance with the previously presented.<sup>10</sup>

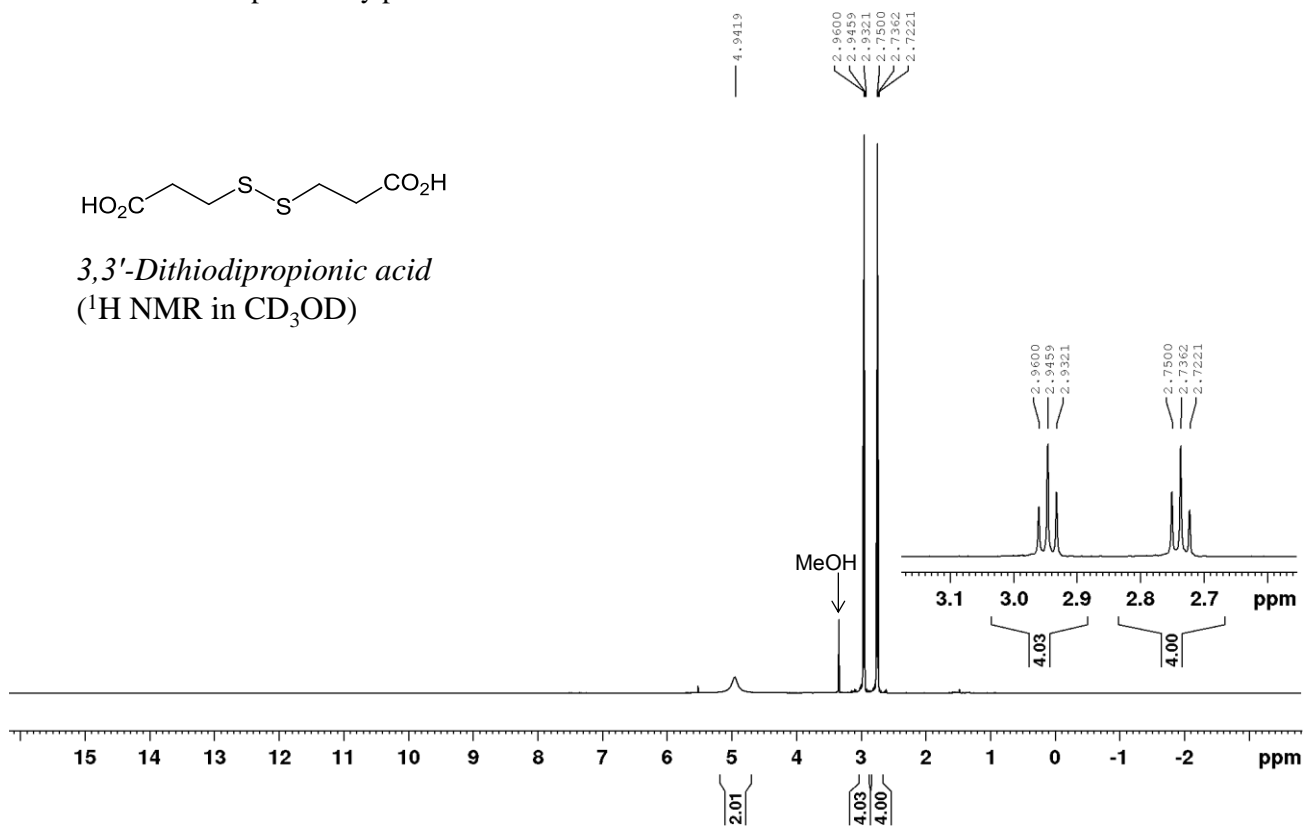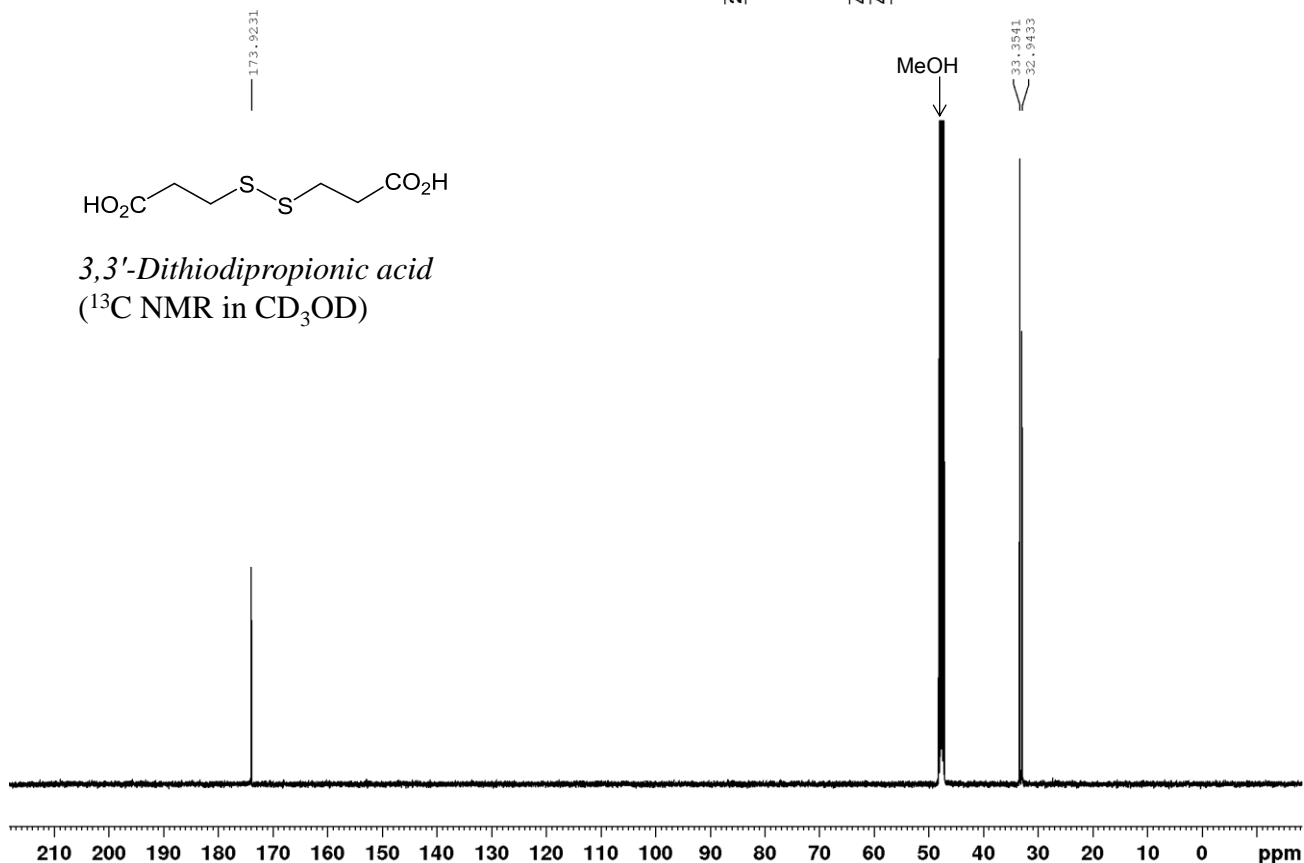

**Cystamine dihydrochloride (16r)**

White solid; Yield in batch: 24.3 mg (96%); Yield in flow: 25.4 mg (quant.);  $^1\text{H}$  NMR ( $\text{D}_2\text{O}$ ):  $\delta = 3.31$  (t,  $J = 6.5$  Hz, 2H), 2.92 (t,  $J = 6.5$  Hz, 2H), 2.68 ppm (t,  $J = 7.2$  Hz, 4H);  $^{13}\text{C}$  NMR ( $\text{CDCl}_3$ ):  $\delta = 38.0, 33.6$  ppm; LRMS (APCI+):  $m/z$  calcd for  $\text{C}_4\text{H}_{13}\text{N}_2\text{S}_2^+$ : 153.05  $[\text{M}+\text{H}-2\text{HCl}]^+$ ; found: 153.05. Spectroscopic data are in accordance with the previously presented.<sup>11</sup>

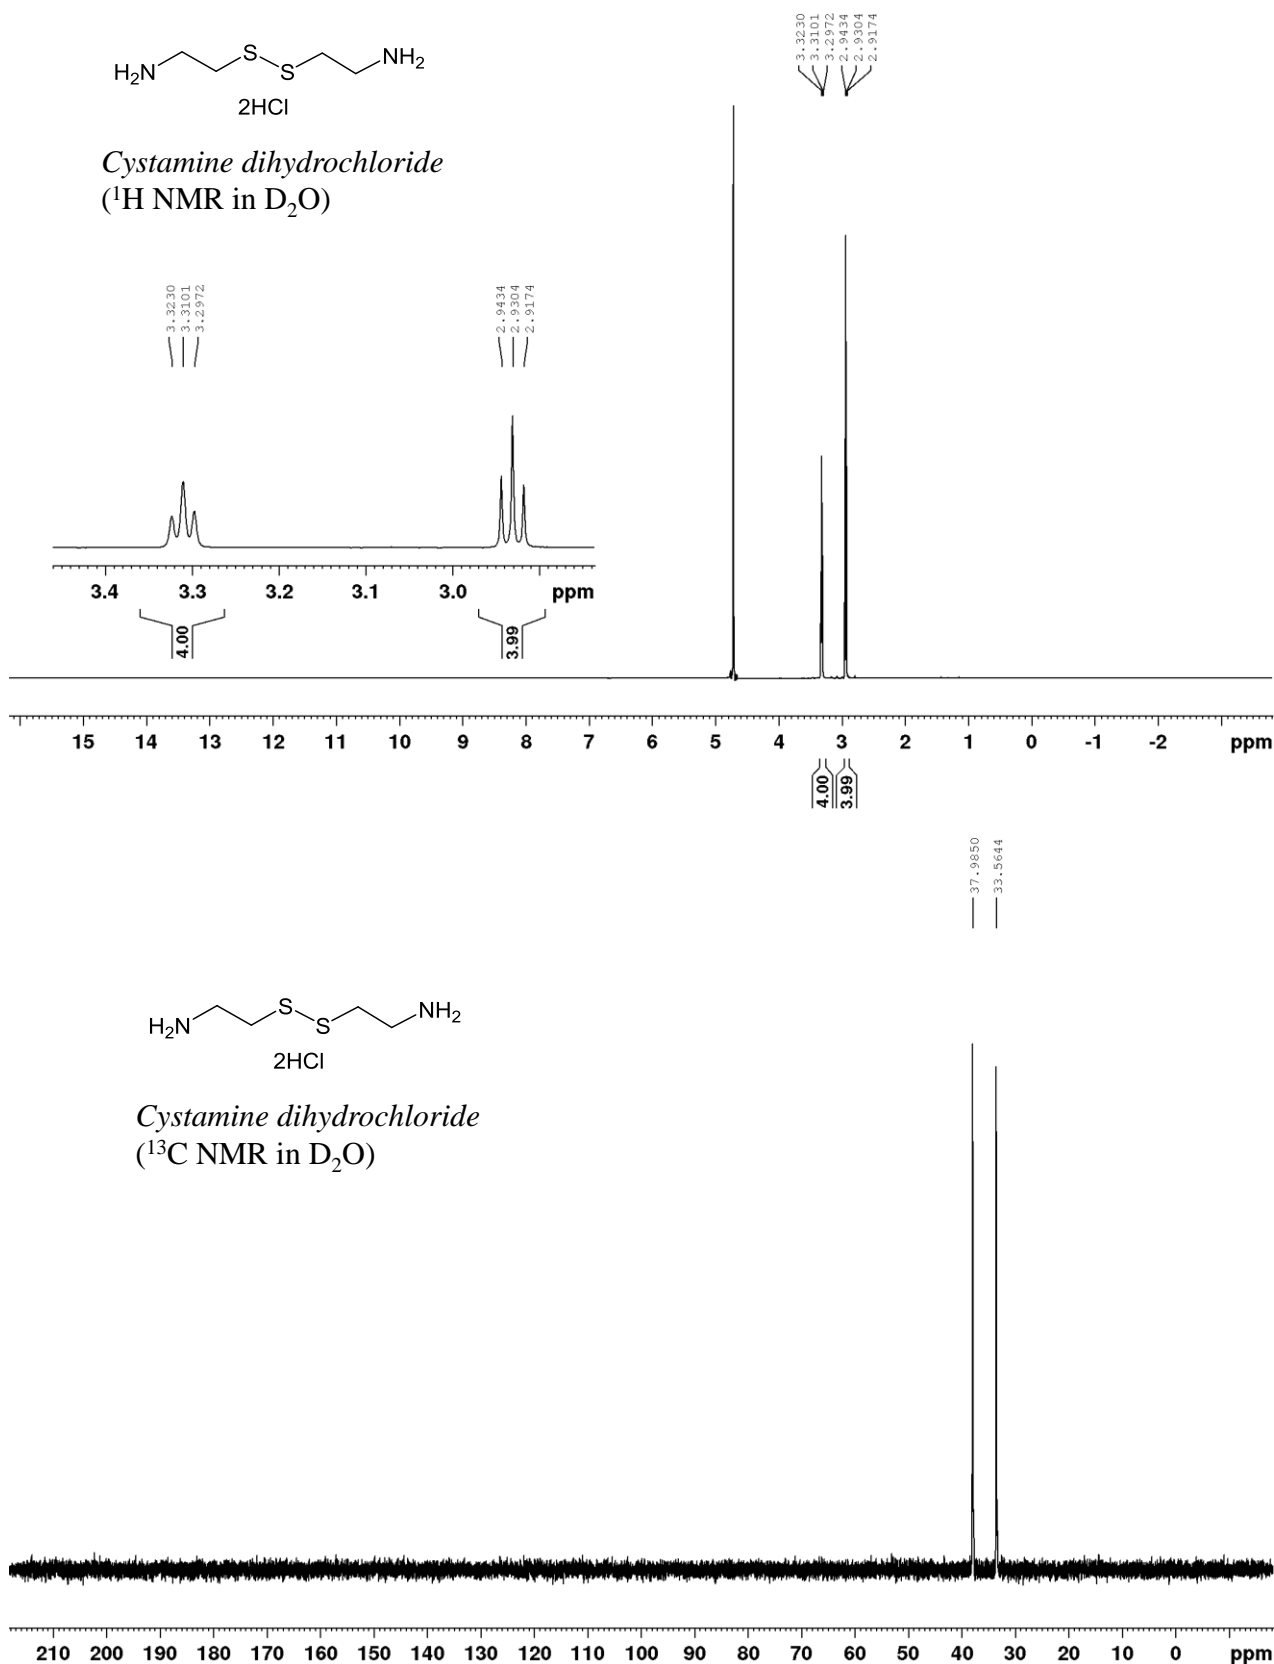



### Glutathione disulfide (**16s**)

White solid; Yield in batch: 69.7 mg (quant.); Yield in flow: 69.0 mg (quant.); in a flow system;  $^1\text{H}$  NMR ( $\text{D}_2\text{O}$ ):  $\delta$  = 4.60 (dd,  $J$  = 4.65, 9.35 Hz, 2H), 3.86–3.78 (m, 4H), 3.69 ppm (t,  $J$  = 5.9 Hz, 2H), 3.13 ppm (dd,  $J$  = 4.7, 14.2 Hz, 2H), 2.84–2.80 ppm (m, 2H), 2.45–2.34 ppm (m, 4H), 2.04–2.00 ppm (m, 4H);  $^{13}\text{C}$  NMR ( $\text{D}_2\text{O}$ ):  $\delta$  = 174.7, 173.6, 173.5, 172.4, 53.7, 52.6, 41.7, 38.8, 31.3, 27.6, 26.0 ppm; LRMS (APCI +):  $m/z$  calcd for  $\text{C}_{20}\text{H}_{33}\text{N}_6\text{O}_{12}\text{S}_2^+$ : 613.16  $[\text{M}+\text{H}]^+$ ; found: 613.23. Spectroscopic data are in accordance with the previously presented.<sup>9</sup>

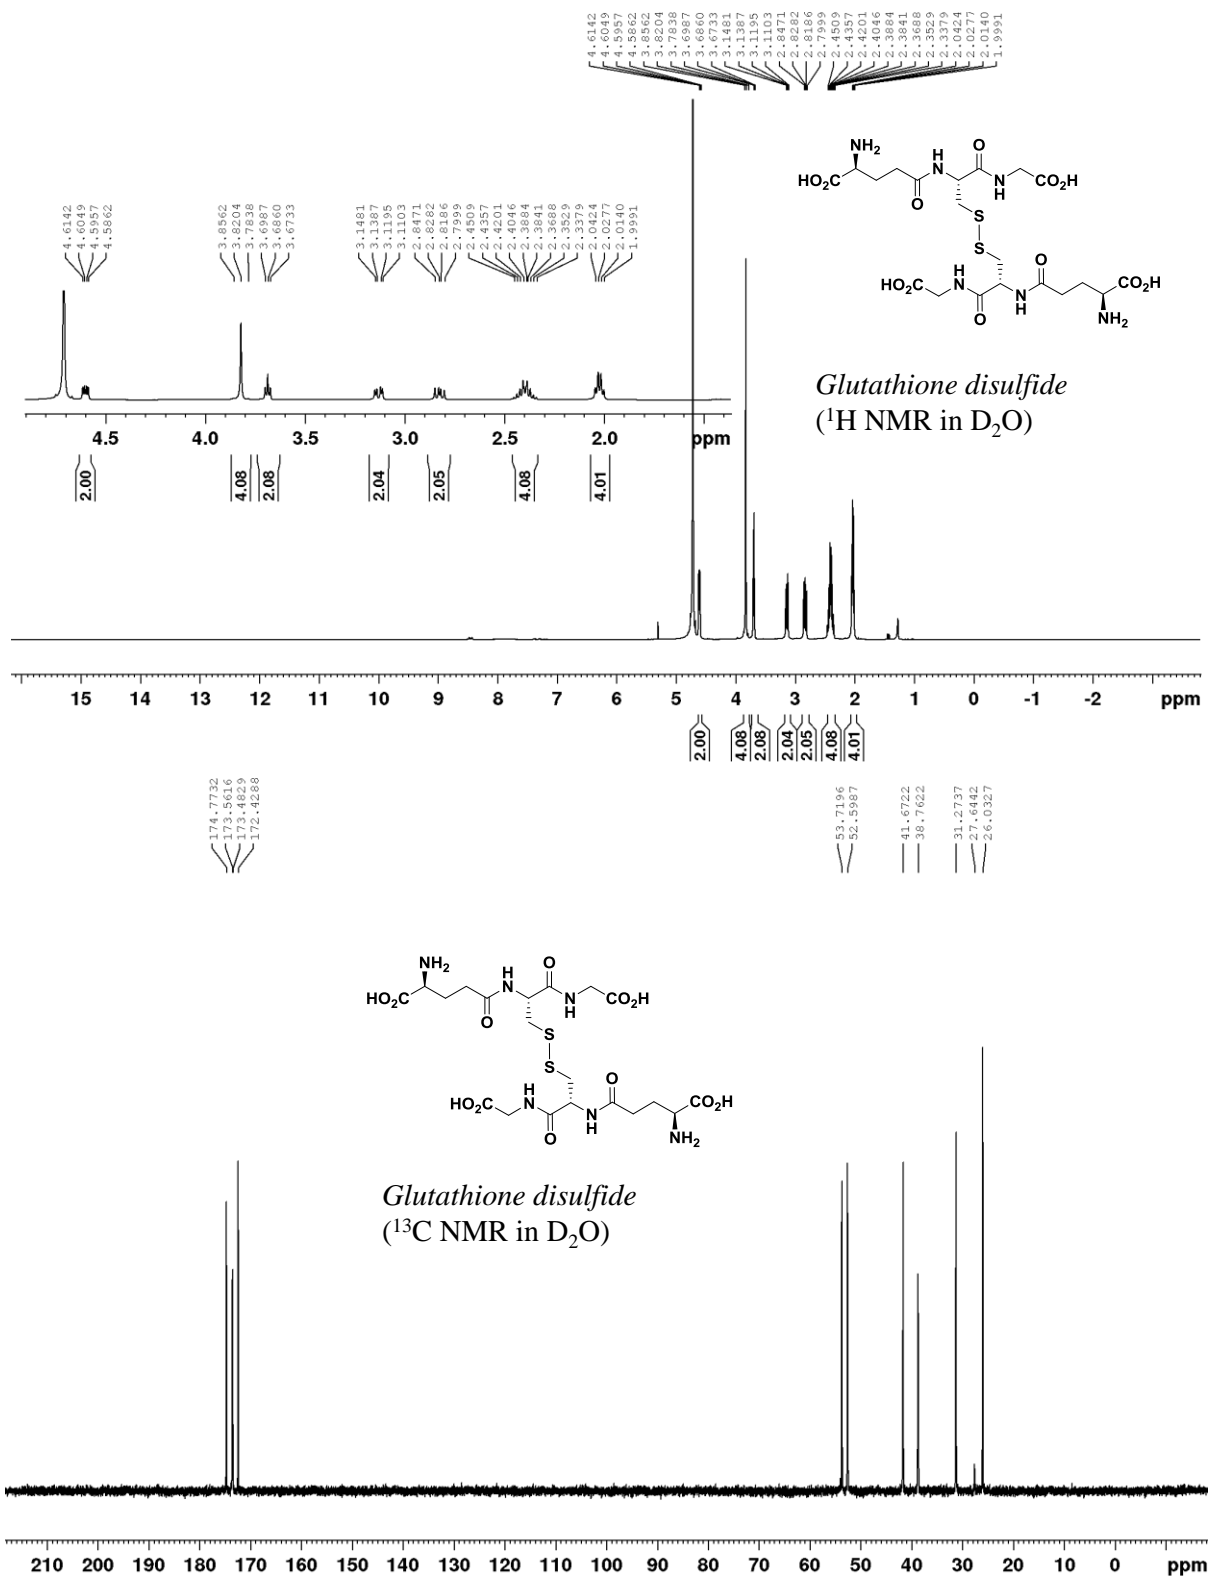

## 2. Supplemental Figures and Tables

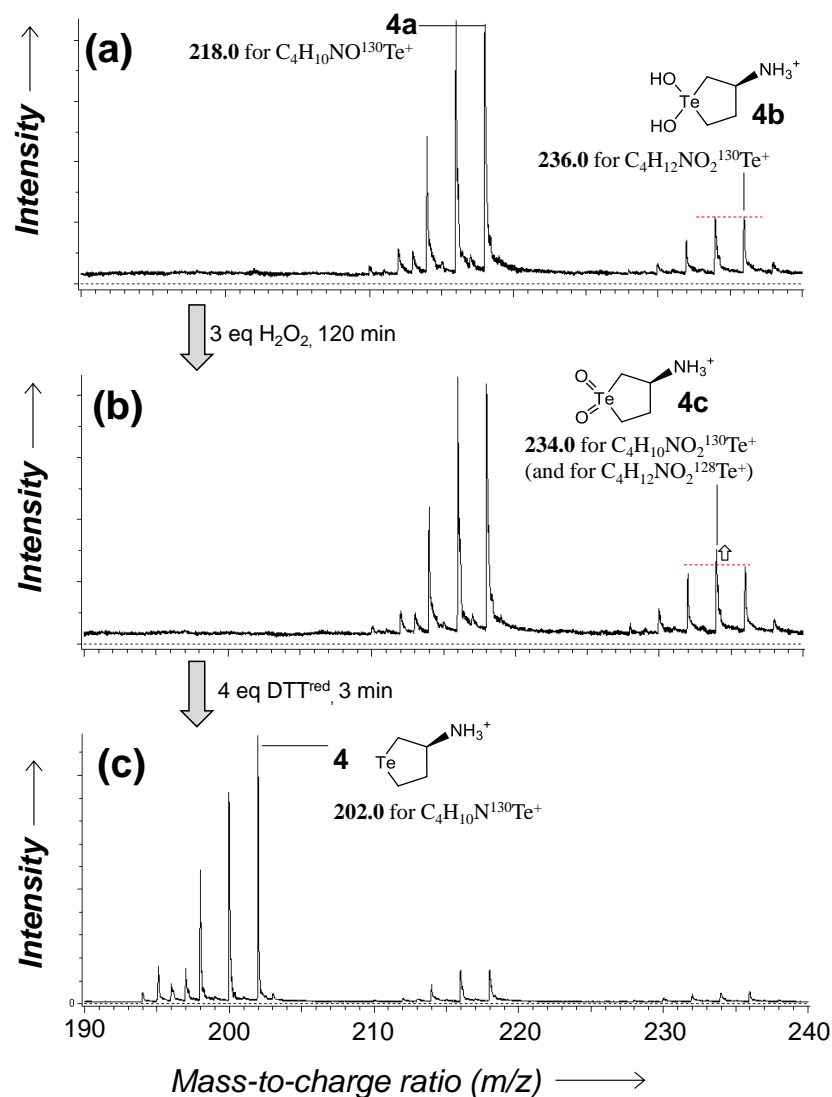

**Fig. S1** ESI(+)-MS spectral changes upon the oxidation and subsequent reduction of **4** in  $H_2O$  at 25 °C. Reaction conditions: (a) **4** (0.47  $\mu$ mol) and  $H_2O_2$  (0.47  $\mu$ mol) were mixed in  $H_2O$ . (b) to **a** was added  $H_2O_2$  (1.41  $\mu$ mol); (c) to **b** was added DTT<sup>red</sup> (1.88  $\mu$ mol).

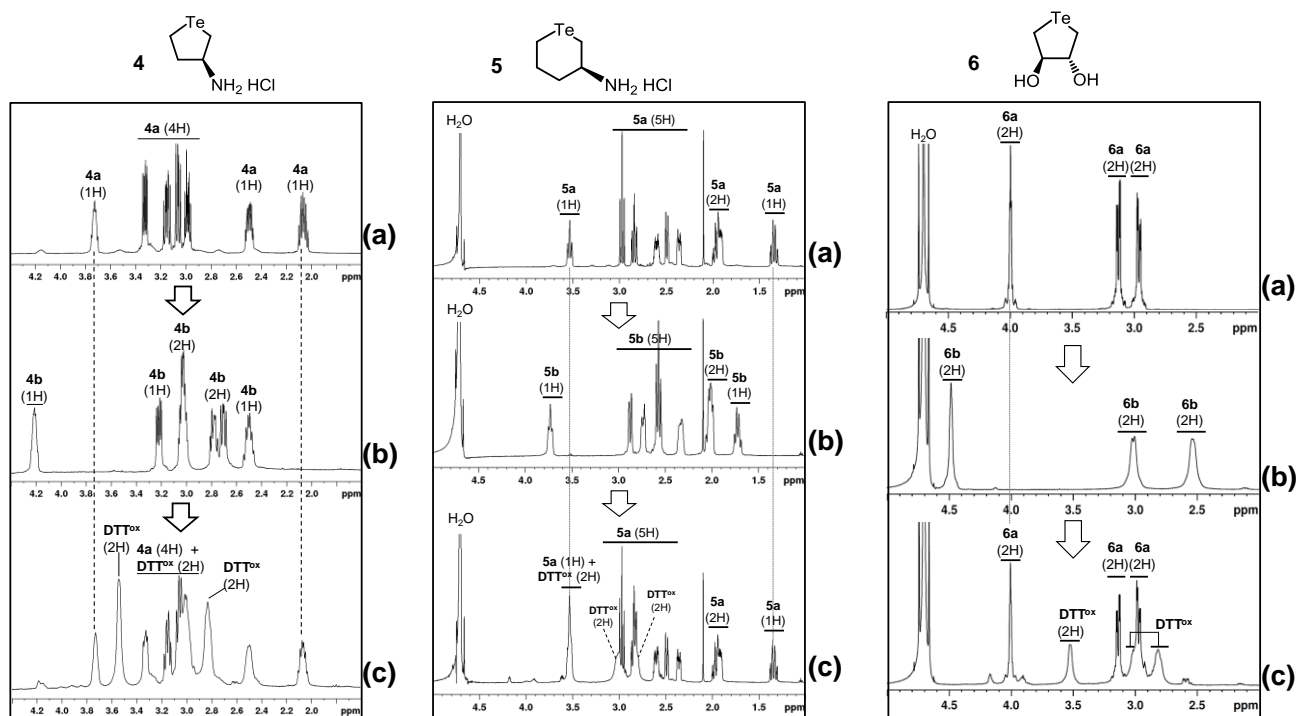

**Fig. S2**  $^1\text{H}$  NMR spectral changes upon oxidation and subsequent reduction of tellurides in  $\text{D}_2\text{O}$  at  $25^\circ\text{C}$ . **Left panel:** (a), **4** ( $24\ \mu\text{mol}$ ) in  $\text{D}_2\text{O}$  ( $500\ \mu\text{L}$ ); (b), (a) +  $\text{H}_2\text{O}_2$  ( $24\ \mu\text{mol}$ ); (c), (b) +  $\text{DTT}^{\text{red}}$  ( $24\ \mu\text{mol}$ ). **Middle panel:** (a), **5** ( $24\ \mu\text{mol}$ ) in  $\text{D}_2\text{O}$  ( $500\ \mu\text{L}$ ); (b), (a) +  $\text{H}_2\text{O}_2$  ( $24\ \mu\text{mol}$ ); (c), (b) +  $\text{DTT}^{\text{red}}$  ( $24\ \mu\text{mol}$ ). **Right panel:** (a), **6** ( $24\ \mu\text{mol}$ ) in  $\text{D}_2\text{O}$  ( $500\ \mu\text{L}$ ); (b), (a) +  $\text{H}_2\text{O}_2$  ( $24\ \mu\text{mol}$ ); (c), (b) +  $\text{DTT}^{\text{red}}$  ( $24\ \mu\text{mol}$ ). All sample solutions were incubated for 5 min at  $25^\circ\text{C}$  before the NMR measurements.

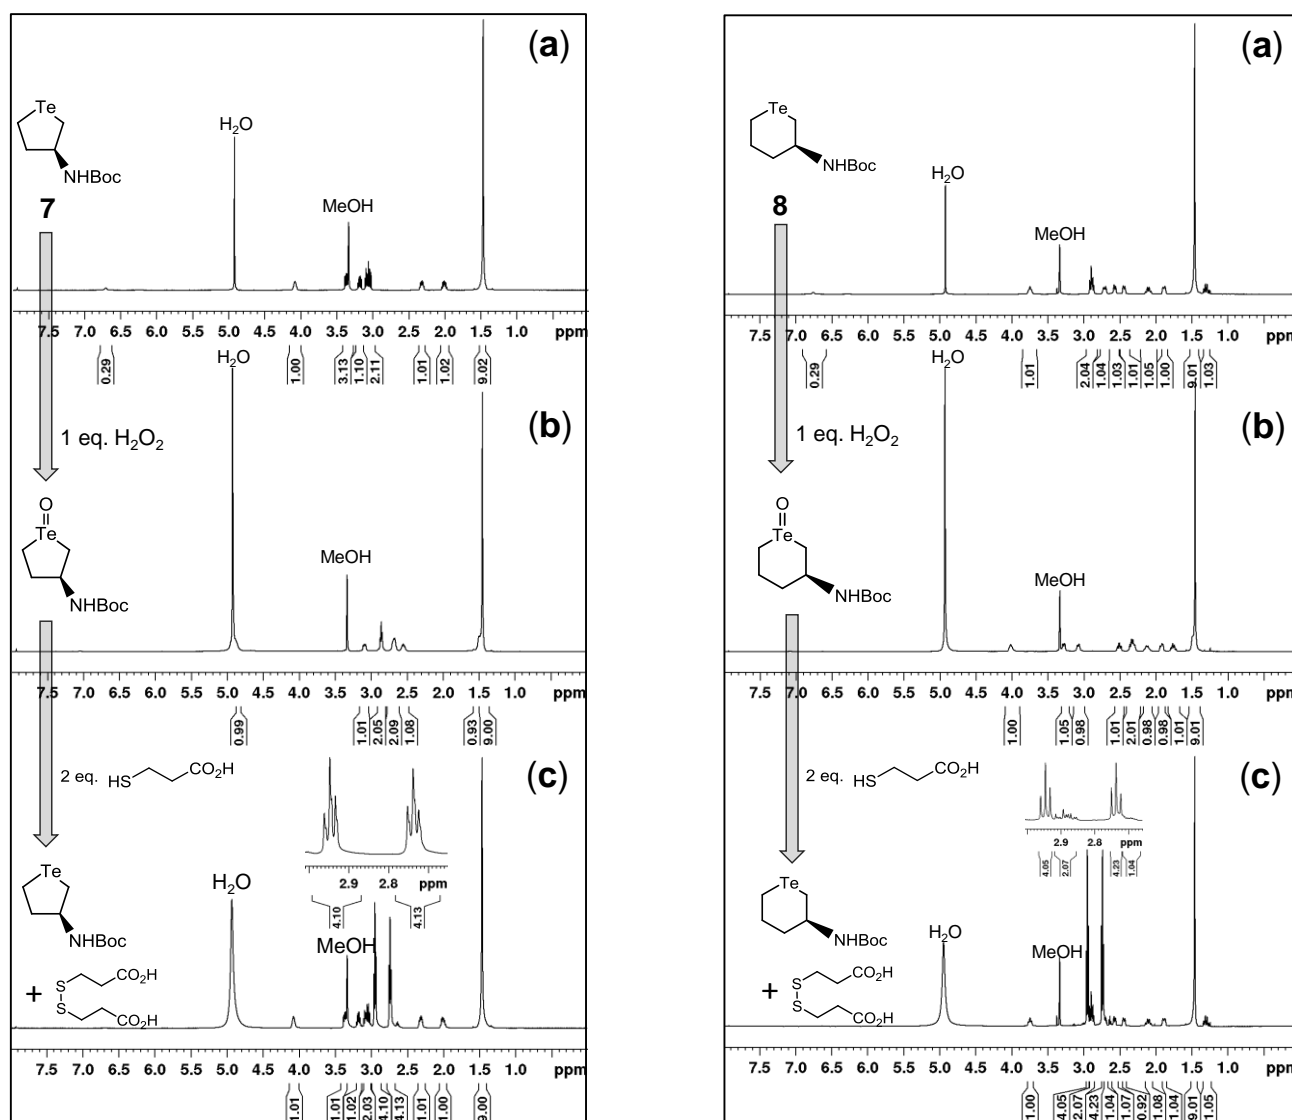

**Fig. S3**  $^1\text{H}$  NMR spectral changes upon oxidation and subsequent reduction of tellurides **7** and **8** in  $\text{CD}_3\text{OD}$  at 25  $^\circ\text{C}$ . **Left panel:** (a), **7** (23.4  $\mu\text{mol}$ ) in  $\text{CD}_3\text{OD}$  (550  $\mu\text{L}$ ); (b), (a) +  $\text{H}_2\text{O}_2$  (23.4  $\mu\text{mol}$ ); (c), (b) + 3-mercaptopropionic acid (46.8  $\mu\text{mol}$ ). **Right panel:** (a), **8** (24  $\mu\text{mol}$ ) in  $\text{CD}_3\text{OD}$  (550  $\mu\text{L}$ ); (b), (a) +  $\text{H}_2\text{O}_2$  (24  $\mu\text{mol}$ ); (c), (b) + 3-mercaptopropionic acid (48  $\mu\text{mol}$ ). All sample solutions were incubated for 5 min at 25 $^\circ\text{C}$  before the NMR measurements.

(a)

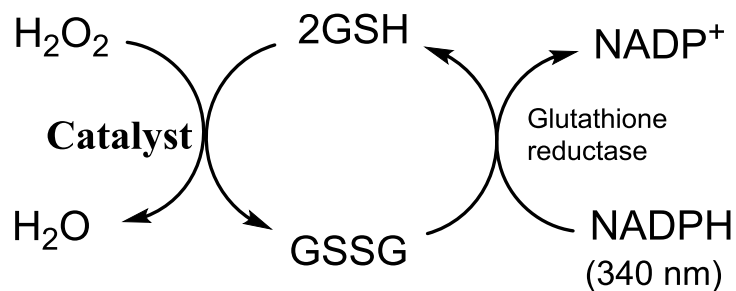

(b)

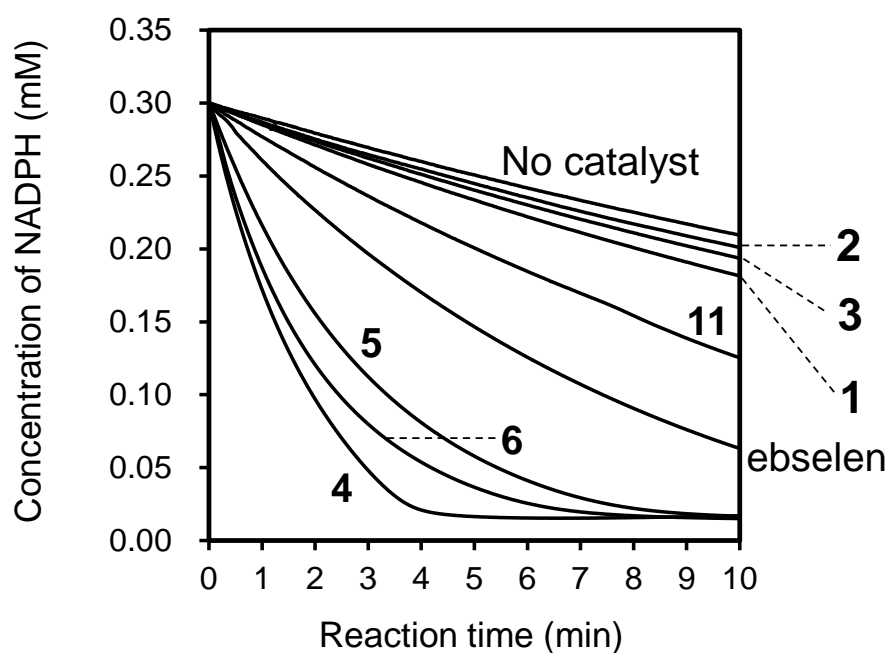

**Fig. S4** (a) GPx-like activity coupled with reduction of GSSG by NADPH in the presence of glutathione reductase (GR). (b) GPx-like activity assay for selenides **1–3**, tellurides **4–6**, and ebselen. Reaction conditions were  $[\text{GSH}]_0 = 4 \text{ mM}$ ,  $[\text{H}_2\text{O}_2]_0 = 0.25 \text{ mM}$ ,  $[\text{NADPH}]_0 = 0.3 \text{ mM}$ ,  $[\text{GR}] = 4 \text{ units/mL}$ , and  $[\text{catalyst}] = 25 \text{ }\mu\text{M}$  in pH 7.2 phosphate buffer at  $25 \text{ }^\circ\text{C}$ .

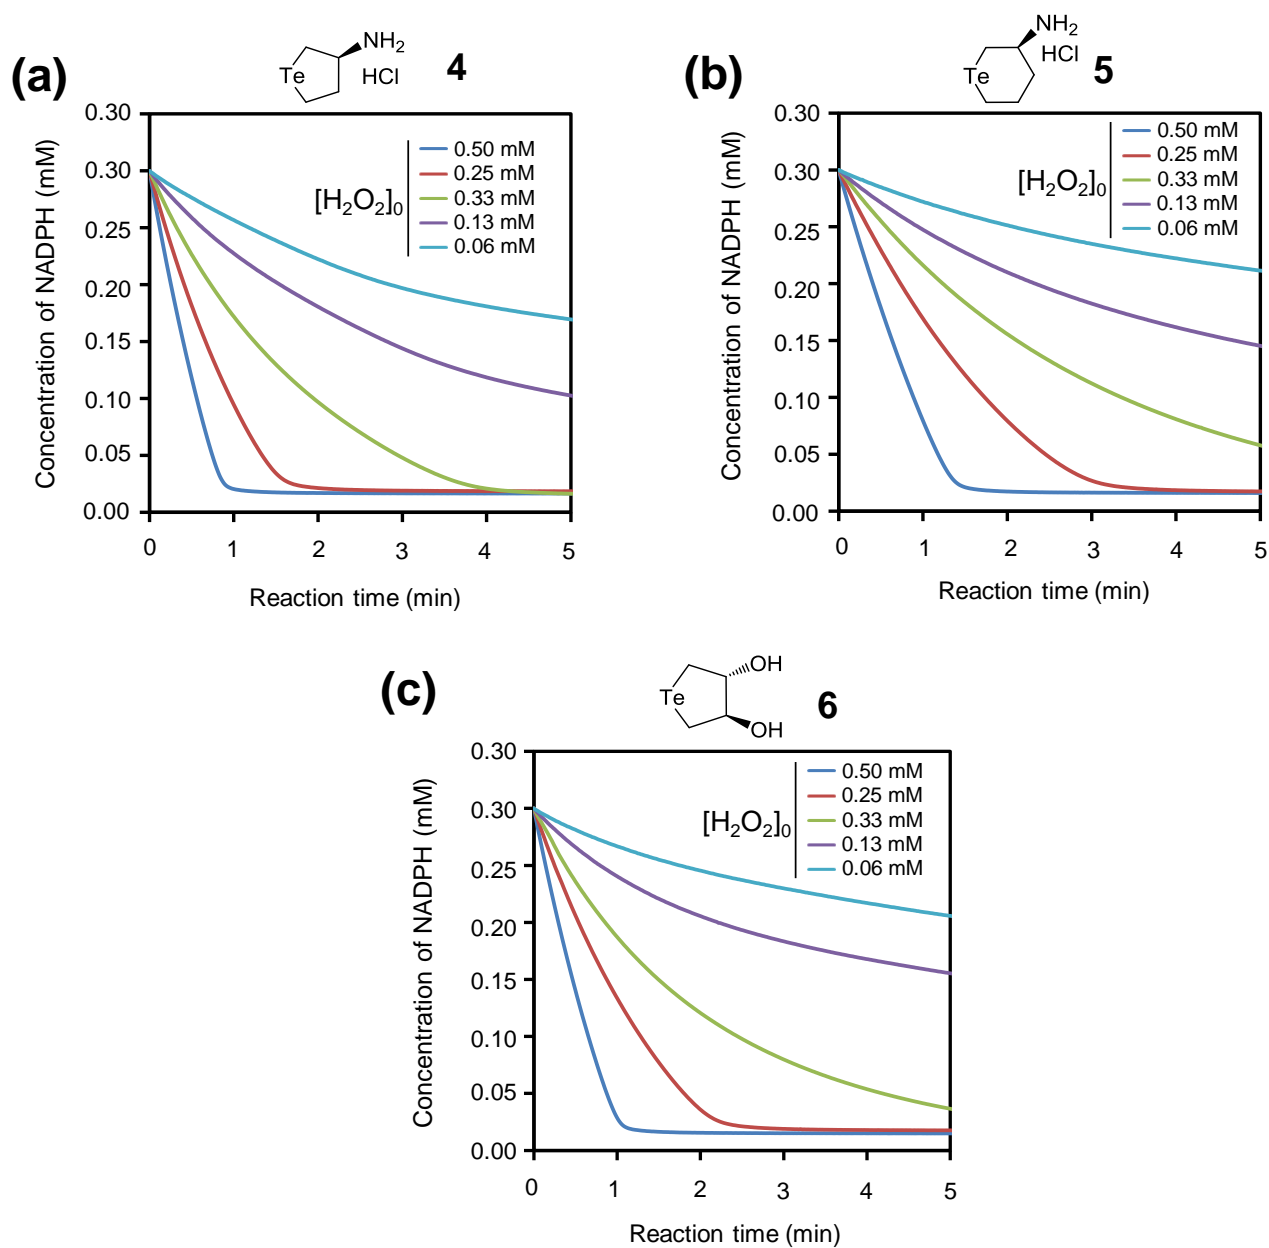

**Fig. S5** Effect of  $H_2O_2$  concentration on GPx-like activity. (a)–(c): GPx-like activity assay for tellurides **4–6**. Reaction conditions were  $[GSH]_0 = 4$  mM,  $[H_2O_2]_0 = 0.06$ – $0.25$  mM,  $[NADPH]_0 = 0.3$  mM,  $[GR] = 4$  units/mL, and  $[catalyst] = 25$   $\mu$ M in pH 7.2 phosphate buffer at 25 °C.

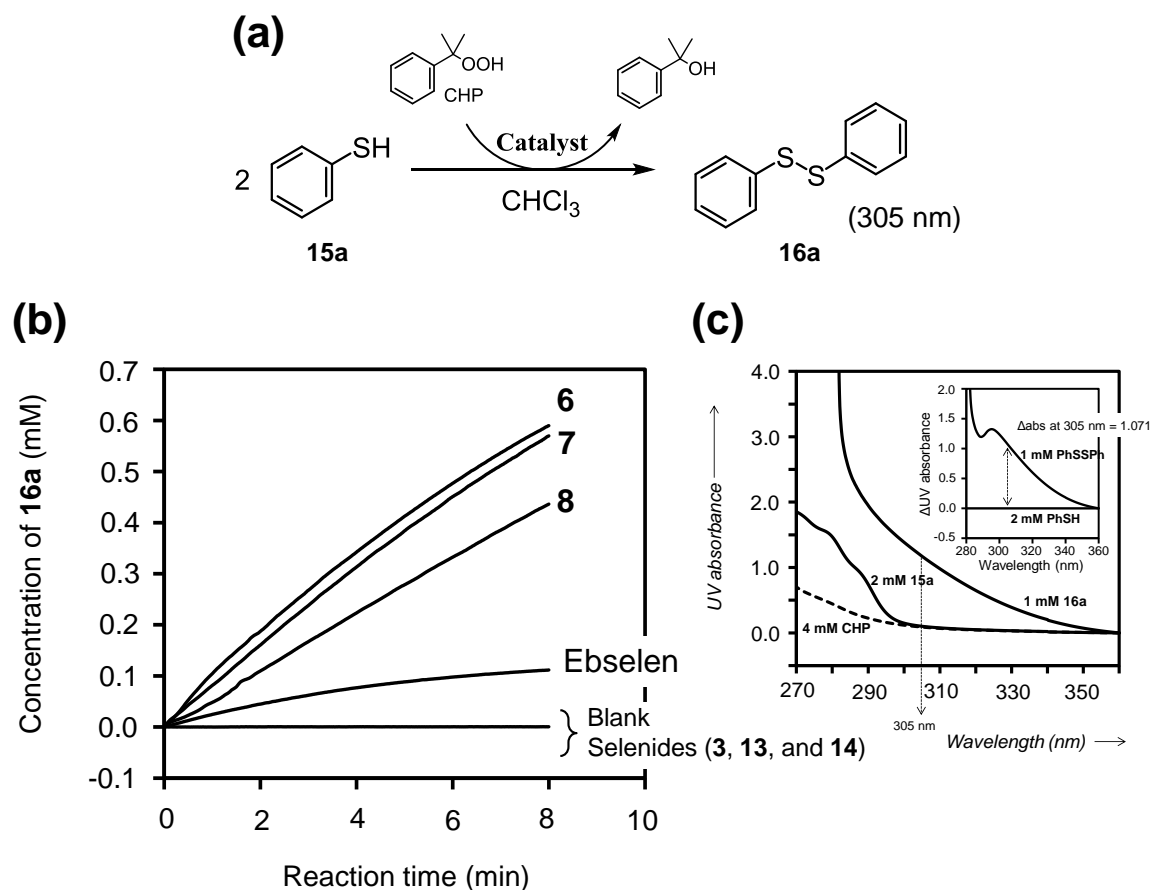

**Fig. S6** (a) GPx-like activity coupled with oxidation of benzenethiol (**16a**) in  $\text{CHCl}_3$ . (b) GPx-like activity assay for selenides **3**, **13**, and **14**, tellurides **6–8**, and ebselen. Reaction conditions were  $[\mathbf{15a}]_0 = 2 \text{ mM}$ ,  $[\text{CHP}]_0 = 2 \text{ mM}$ ,  $[\text{catalyst}] = 0.04 \text{ mM}$  in  $\text{CHCl}_3$  at  $25^\circ\text{C}$ . (c) UV spectra and the UV differential spectra of **15a** (2 mM) and **16a** (1 mM) in  $\text{CHCl}_3$ .

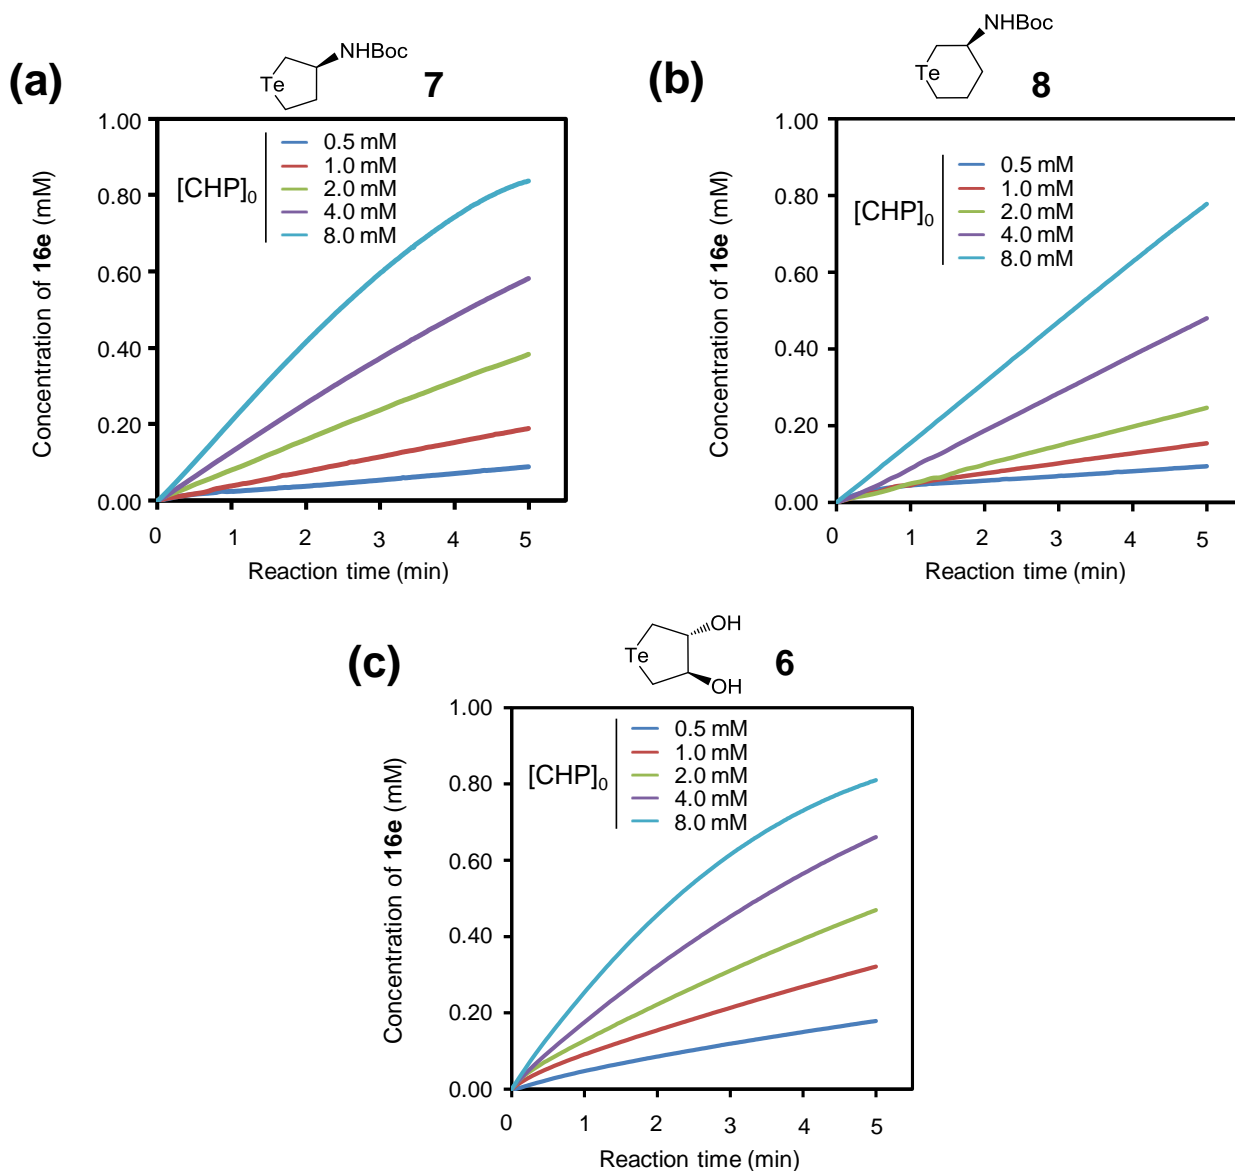

**Fig. S7** Effect of CHP concentration on GPx-like activity in  $CHCl_3$ . (a), (b), and (c): GPx-like activity assay for tellurides **7**, **8**, and **6**, respectively. Reaction conditions were  $[15a]_0 = 2$  mM,  $[CHP]_0 = 0.5$ – $8.0$  mM, and  $[catalyst] = 0.04$  mM in  $CHCl_3$  at  $25$  °C.



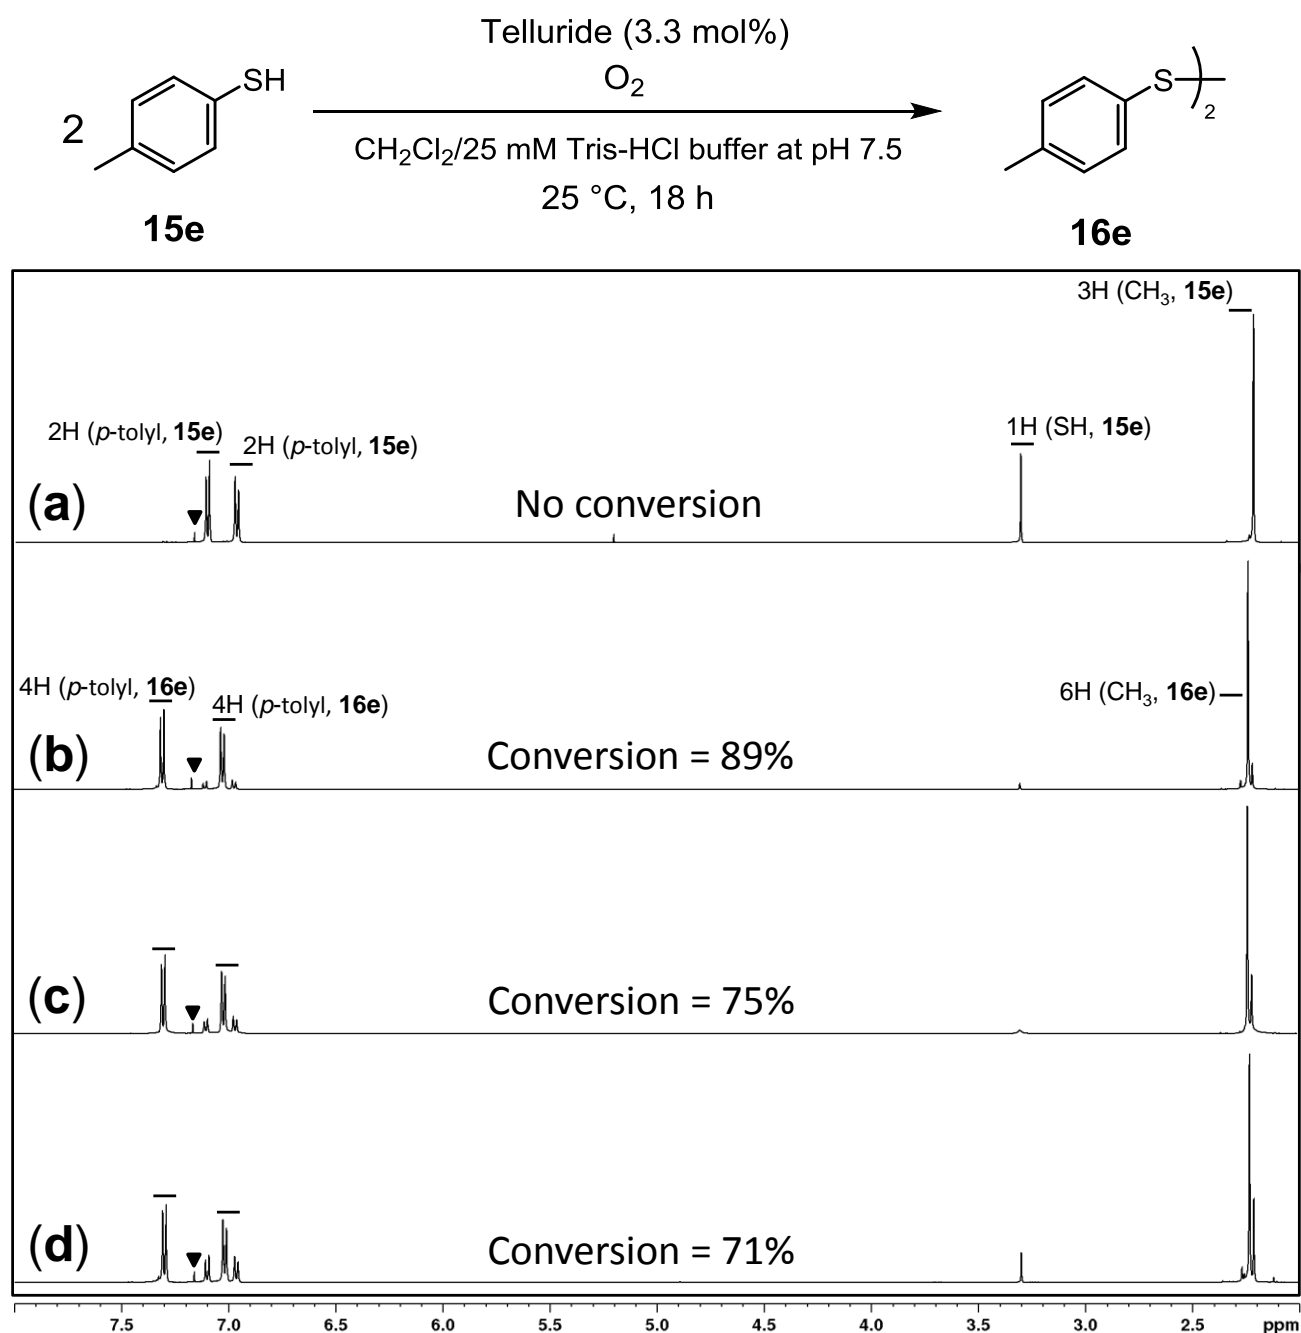

**Fig. S8**  $^1\text{H}$  NMR spectra obtained from aerial oxidation experiments of **15e** by using cyclic telluride catalysts. Reaction conditions: **15e** (0.23 mmol) and catalyst (3.3 mol%, 7.6  $\mu\text{mol}$ ) in  $\text{CH}_2\text{Cl}_2$  (4 mL)/water (4 mL) at 25  $^\circ\text{C}$  for 18 h in the absence (a) or presence of telluride **4** (b), **5** (c), or **6** (d).

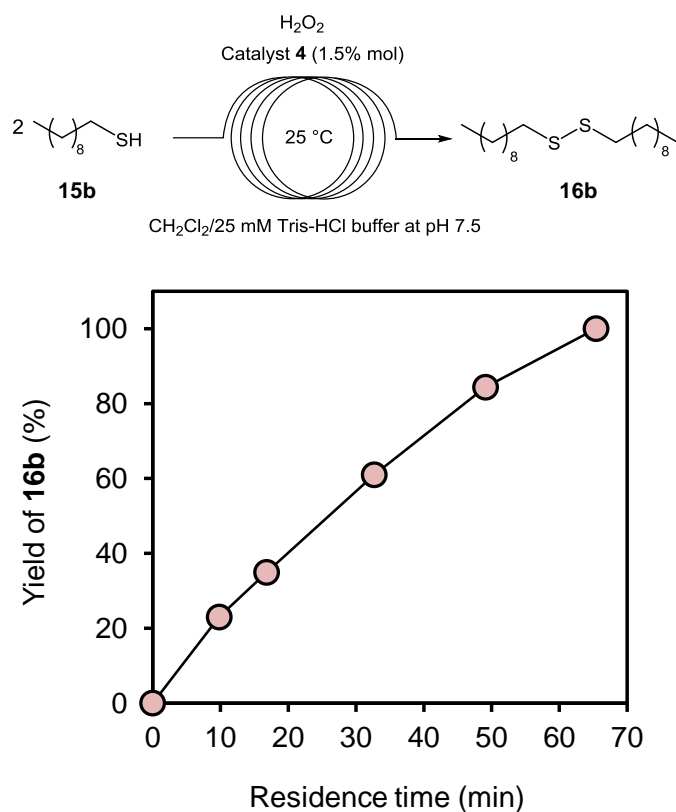

**Fig. S9** Residence time effect on the catalytic oxidation of **15b** in a segmented-microflow system. Reaction conditions: **15b** (0.23 mmol),  $\text{H}_2\text{O}_2$  (0.23 mmol), and catalyst (3.45  $\mu\text{mol}$ ) in  $\text{CH}_2\text{Cl}_2/25\text{ mM Tris-HCl}$  buffer solution at pH 7.5 (1:1 = v/v) at  $25^\circ\text{C}$ . The yields were estimated by  $^1\text{H}$  NMR.

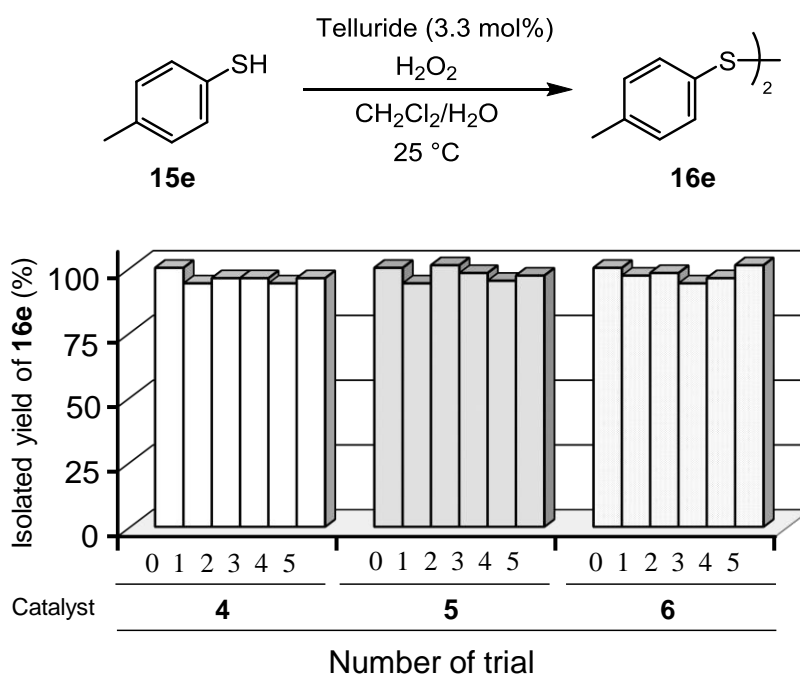

**Fig. S10** Isolated yield of **16e** during recycle of telluride catalysts **4–6** in five times. Reaction conditions: **15e** (0.23 mmol),  $\text{H}_2\text{O}_2$  (0.23 mmol), and catalyst (7.6  $\mu\text{mol}$ ) in  $\text{CH}_2\text{Cl}_2$  (4 mL) and  $\text{H}_2\text{O}_2$  (4 mL) at  $25^\circ\text{C}$  for 180 min. The reaction was progressed with vigorously stirring.

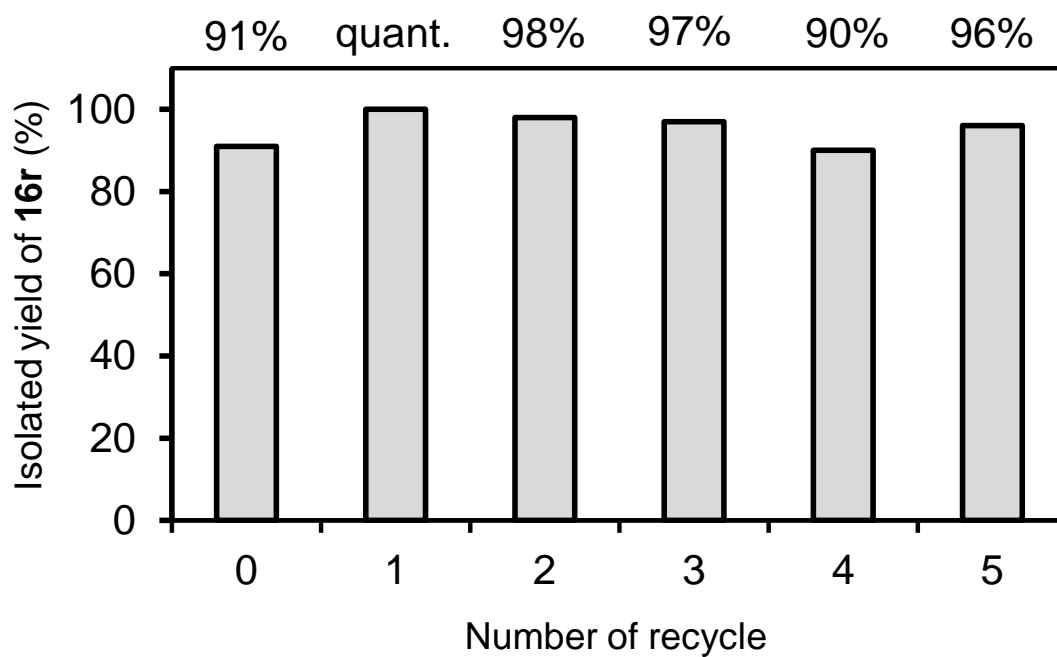

**Fig. S11.** Isolated yield of **16r** during six consecutive cycles of catalyst **7**. Reaction conditions: **15r** (0.23 mmol), H<sub>2</sub>O<sub>2</sub> (0.23 mmol), and catalyst (7.6  $\mu$ mol) in CH<sub>2</sub>Cl<sub>2</sub> (4 mL) and H<sub>2</sub>O<sub>2</sub> (4 mL) at 25 °C for 6 h. The reaction was progressed with vigorously stirring.

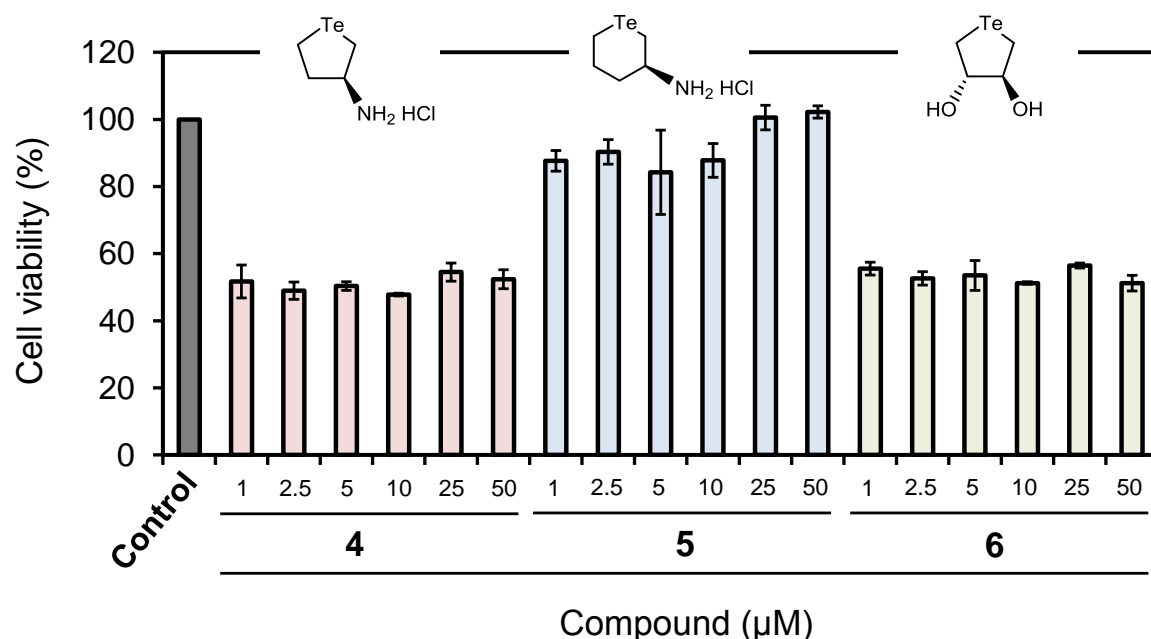

**Fig. S12.** Cytotoxicity of compounds **4–6** at different concentrations determined by MTT assay with HeLa cells. HeLa cells ( $1 \times 10^4$  cell/well) was cultured for 4 h in the presence of compounds **4–6** (1–50  $\mu$ M) at 37 °C and 5% CO<sub>2</sub>. Bars are shown as means  $\pm$ SEM ( $n=4$ ).

**Experimental:** Each well in a 96-well plate was seeded with HeLa cells ( $1 \times 10^4$  cells/well) in Dulbecco's Modified Eagle's Medium supplemented with 5% fetal bovine serum. After culturing in a humidified incubator at 37 °C with 5% CO<sub>2</sub> for 24 h, the cells were treated with 1–50  $\mu$ M of compounds 4–6 in medium (100  $\mu$ L) without fetal bovine serum and incubated for 4 h at 37 °C with 5% CO<sub>2</sub>. The medium was then removed, and the cells were washed with phosphate-buffered saline. 3-(4,5-Dimethylthiazol-2-yl)-2,5-diphenyltetrazolium bromide (MTT) solution (100  $\mu$ L, 0.5 mg/mL in medium) was then added, and the cells were incubated for 4 h at 37 °C with 5% CO<sub>2</sub>. MTT solution was then removed and dimethyl sulfoxide (100  $\mu$ L) was added to each well to dissolve the formazan crystals, and the cells were incubated at 25 °C with shaking at 350 rpm. The absorbance at 530 nm was measured using a microplate reader. The control cells, which were treated with the medium containing no compound, were assumed to be 100% viable. The percentage viability of the treated cells was calculated from eq. (1).

$$\%viability = \frac{Abs_{sample}^{535} - Abs_{blank}^{535}}{Abs_{control}^{530} - Abs_{blank}^{530}} \quad \dots(1)$$

(a)

**Pump 2**

Syringe A:  
RSH **15** (56.3 mM) in  $\text{CH}_2\text{Cl}_2$   
(Solution I)

**Pump 1**

Syringe B:  
 $\text{H}_2\text{O}_2$  (113 mM) in  $\text{H}_2\text{O}$  (Solution II)  
Syringe C:  
**Telluride** (1.69 mM)  
in 50 mM Tris-HCl buffer at pH 7.5  
(Solution III)

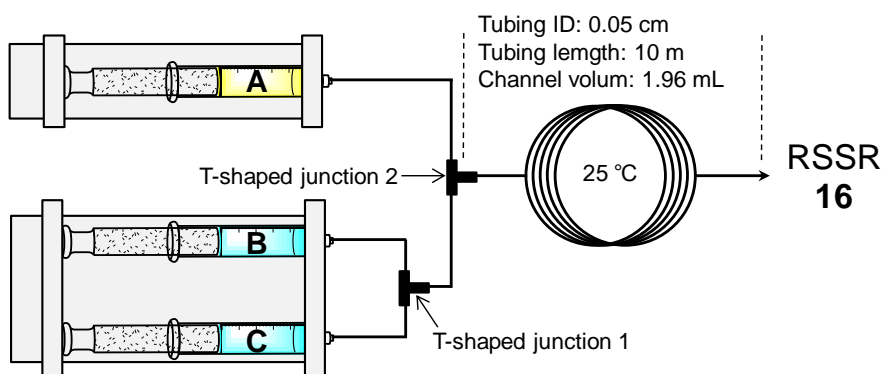

(b)

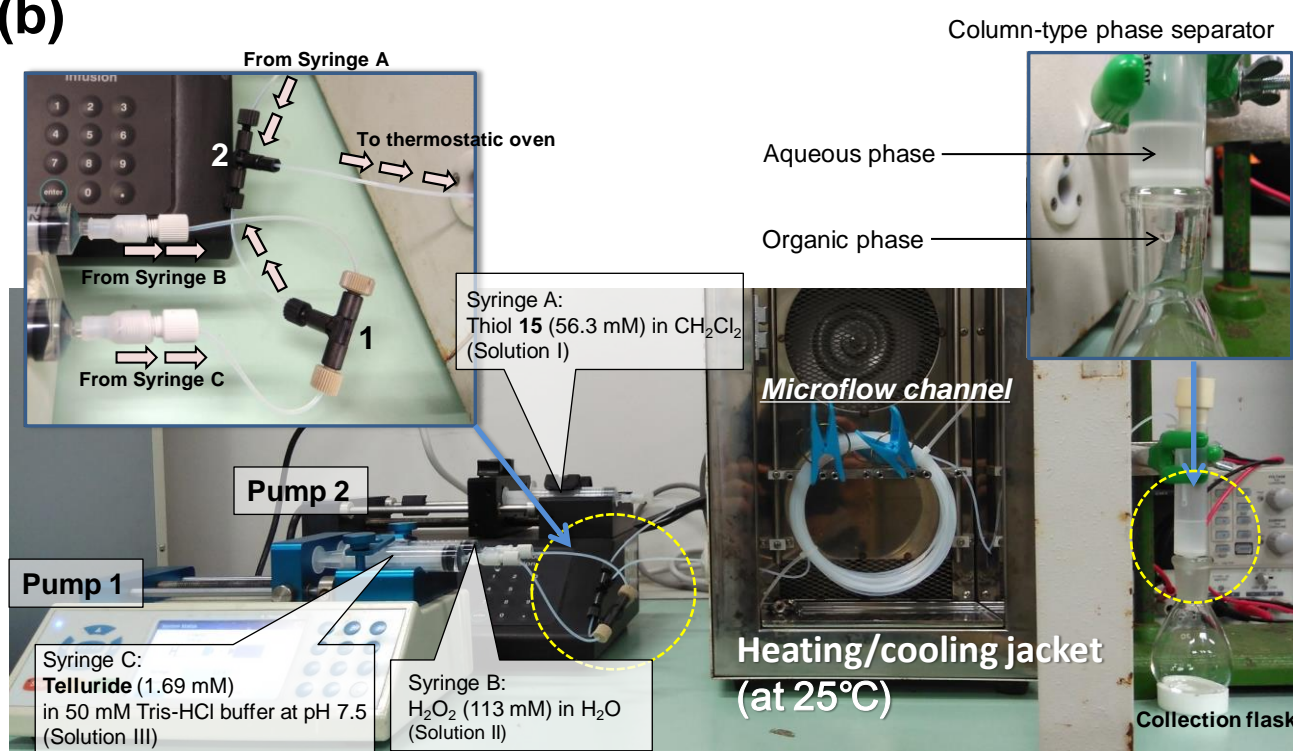

**Fig. S13** Schematic (a) and photographs (b) of flow setup for the oxidation of fat-soluble thiols.

*Note:* Plastic T-shape junctions were purchased from EYELA. (Inner diameter: 0.5 mm). Teflon<sup>®</sup> tubes (ID = 0.5 mm) and PEEK fittings were purchased from GL Science Co., Ltd. Solutions were introduced to microflow channels with syringe pumps (Pump 1: Fusion Touch 100 from ISIS Co., Ltd and Pump 2: PHD 2000 syringe pump infusion 100 from Harvard apparatus) equipped disposable plastic syringes which include no rubber in the material.

## Pump 2

Syringe A:  
RSH **15** (56.3 mM or 28.2 mM) in water  
or aqueous HCl solution (100 mM)  
(Solution I)

## Pump 1

Syringe B:  
CHP (113 mM or 56.5 mM) in  $\text{CH}_2\text{Cl}_2$   
(Solution II)

Syringe C:  
Telluride (3.73 mM or 1.87 mM) in  
 $\text{CH}_2\text{Cl}_2$   
(Solution III)

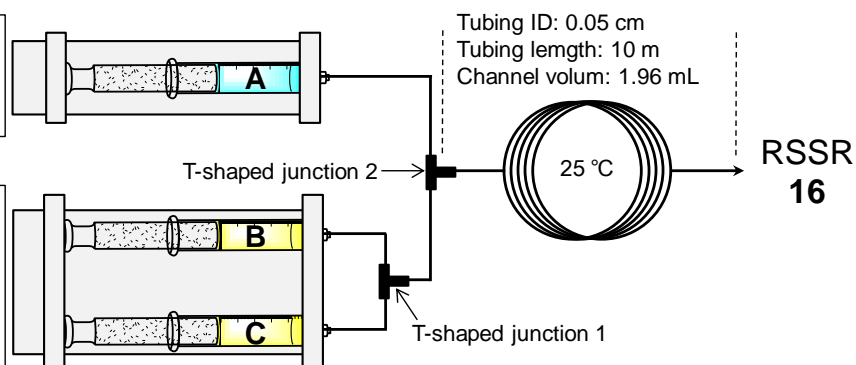

**Fig. S14** Schematic of flow setup for the oxidation of water-soluble thiols.

**Table S1.** Catalytic oxidation of thiols in a biphasic organic-aqueous system under a batch condition.

| $  \begin{array}{ccc}  & \text{H}_2\text{O}_2 & \\  & \text{Te-catalyst (3.3\%mol)} & \\  2\text{RSH} & \xrightarrow{\hspace{1.5cm}} & \text{RSSR} \\  \mathbf{15} & \text{CH}_2\text{Cl}_2/25 \text{ mM Tris-HCl pH 7.5 buffer or H}_2\text{O} & \mathbf{16} \\  & \text{at 25 } ^\circ\text{C} &  \end{array}  $                                                    |                                                                                |                                                                              |  |
|-----------------------------------------------------------------------------------------------------------------------------------------------------------------------------------------------------------------------------------------------------------------------------------------------------------------------------------------------------------------------|--------------------------------------------------------------------------------|------------------------------------------------------------------------------|--|
| Thiol <b>15</b>                                                                                                                                                                                                                                                                                                                                                       | Yield of disulfide <b>16</b> <sup>a</sup>                                      |                                                                              |  |
|                                                                                                                                                                                                                                                                                                                                                                       | Catalyst <b>4</b> <sup>b</sup>                                                 | Catalyst <b>6</b> <sup>c</sup>                                               |  |
| 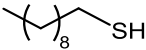<br><b>15b</b>                                                                                                                                                                                                                                                                       | <b>16b</b> (99%)                                                               | <b>16b</b> (98%)                                                             |  |
| <br><b>15c</b>                                                                                                                                                                                                                                                                       | <b>16c</b> (99%)                                                               | <b>16c</b> (96%)                                                             |  |
| <br><b>15a</b> X = H <b>15d</b> X = OMe<br><b>15e</b> X = Me <b>15f</b> X = <i>t</i> Bu                                                                                                                                                                                              | <b>16a</b> (95%) <b>16d</b> (quant.)<br><b>16e</b> (98%) <b>16f</b> (quant.)   | <b>16a</b> (quant.) <b>16d</b> (97%)<br><b>16e</b> (quant.) <b>16f</b> (96%) |  |
| <br><b>15g</b> X = F<br><b>15h</b> X = Cl<br><b>15i</b> X = Br                                                                                                                                                                                                                     | <b>16g</b> (quant.)<br><b>16h</b> (quant.)<br><b>16i</b> (quant.)              | <b>16g</b> (99%)<br><b>16h</b> (quant.)<br><b>16i</b> (97%)                  |  |
| <br><b>15j</b>                                                                                                                                                                                                                                                                     | <b>16j</b> (97%)                                                               | <b>16j</b> (quant.)                                                          |  |
| <br><b>15l</b> X <sup>1</sup> = NHBoc, X <sup>2</sup> = CO <sub>2</sub> Me<br><b>15m</b> X <sup>1</sup> = NHAc, X <sup>2</sup> = CO <sub>2</sub> Me<br><b>15n</b> X <sup>1</sup> = H, X <sup>2</sup> = CO <sub>2</sub> Me<br><b>15o</b> X <sup>1</sup> = H, X <sup>2</sup> = NHBoc | <b>16l</b> (quant)<br><b>16m</b> (72%)<br><b>16n</b> (92%)<br><b>16o</b> (95%) | <b>16l</b> (89%)<br><b>16m</b> (78%)<br><b>16n</b> (79%)<br><b>16o</b> (80%) |  |

Reaction conditions: **15** (0.23 mmol), H<sub>2</sub>O<sub>2</sub> (0.23 mmol), and catalyst (3.3 mol%, 7.6 μmol), CH<sub>2</sub>Cl<sub>2</sub>/25 mM Tris-HCl buffer solution (1:1 = v/v) at pH 7.5 and 25 °C. <sup>a</sup>Isolated yield. <sup>b</sup>25 mM Tris-HCl buffer solution was used as an aqueous solvent. <sup>c</sup>Distilled water was used as an aqueous solvent.

**Table S2.** Optimization of tubing ID of microflow channel.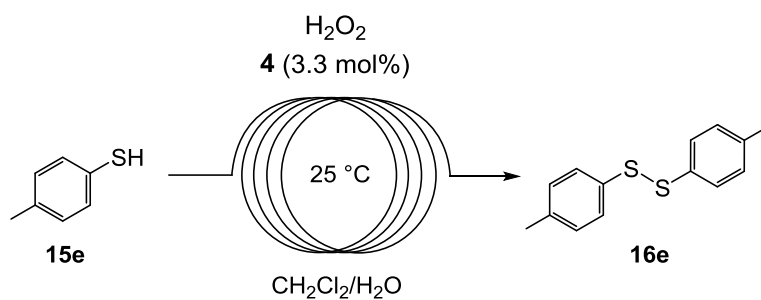

| Entry | Tubing length (m) | Tubing ID (mm) | Residence time (min) <sup>a</sup> | Amount of catalyst <b>4</b> (mol%) | Conversion (%) <sup>b</sup> |
|-------|-------------------|----------------|-----------------------------------|------------------------------------|-----------------------------|
| 1     | 4.8               | 1.0            | 18.8                              | 3.3                                | 78                          |
| 2     | 4.8               | 1.0            | 37.6                              | 3.3                                | 87                          |
| 3     | 4.8               | 1.0            | 9.4                               | 3.3                                | 67                          |
| 4     | 10                | 0.05           | 19.6                              | 3.3                                | 100                         |
| 5     | 10                | 0.05           | 16.8                              | 3.3                                | 100                         |
| 6     | 10                | 0.05           | 16.8                              | 1.5                                | 100                         |
| 7     | 10                | 0.05           | 16.8                              | 0                                  | 0                           |

<sup>a</sup> Defined as volume of tube (mL)/ flow rate (mL/min). <sup>b</sup> Estimated by  $^1\text{H}$  NMR analysis.



**Table S3.** Catalytic oxidation of thiols in biphasic organic-aqueous system under a segmented microflow condition.

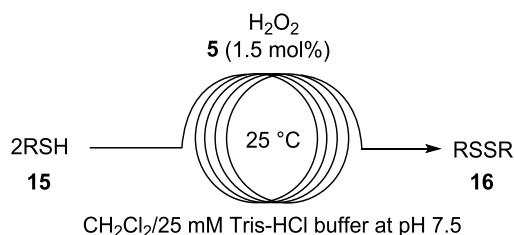

| Thiol <b>15</b>                                                                                                                                                                                                                                                                    | Residence time <sup>a</sup> | Yield of disulfide <b>16</b> <sup>b</sup>                                       |
|------------------------------------------------------------------------------------------------------------------------------------------------------------------------------------------------------------------------------------------------------------------------------------|-----------------------------|---------------------------------------------------------------------------------|
| <br><b>15b</b>                                                                                                                                                                                                                                                                     | 65.4 min                    | <b>16b</b> (85% conversion) <sup>c</sup>                                        |
| <br><b>15c</b>                                                                                                                                                                                                                                                                     | 65.4 min                    | <b>16c</b> (86% conversion) <sup>c</sup>                                        |
| <br><b>15a</b> X = H <b>15d</b> X = OMe<br><b>15e</b> X = Me <b>15f</b> X = <i>t</i> Bu                                                                                                                                                                                            | 32.7 min                    | <b>16a</b> (96%) <b>16a</b> (96%)<br><b>16e</b> (97%) <b>16e</b> (97%)          |
| <br><b>15g</b> X = F<br><b>15h</b> X = Cl<br><b>15i</b> X = Br                                                                                                                                                                                                                     | 19.6 min                    | <b>16g</b> (97%)<br><b>16h</b> (95%)<br><b>16i</b> (98%)                        |
| <br><b>15j</b>                                                                                                                                                                                                                                                                     | 32.7 min                    | <b>16j</b> (99%)                                                                |
| <br><b>15k</b>                                                                                                                                                                                                                                                                     | ND <sup>d</sup>             | <b>16k</b> (ND) <sup>d</sup>                                                    |
| <br><b>15l</b> X <sup>1</sup> = NHBoc, X <sup>2</sup> = CO <sub>2</sub> Me<br><b>15m</b> X <sup>1</sup> = NHAc, X <sup>2</sup> = CO <sub>2</sub> Me<br><b>15n</b> X <sup>1</sup> = H, X <sup>2</sup> = CO <sub>2</sub> Me<br><b>15o</b> X <sup>1</sup> = H, X <sup>2</sup> = NHBoc | 32.7 min                    | <b>16l</b> (97%)<br><b>16m</b> (68%)<br><b>16n</b> (quant.)<br><b>16o</b> (93%) |

Reaction conditions: **15** (0.23 mmol), H<sub>2</sub>O<sub>2</sub> (0.23 mmol), and catalyst (3.45 or 7.6 μmol), CH<sub>2</sub>Cl<sub>2</sub>/25 mM Tris-HCl buffer solution (1:1 = v/v) at pH 7.5 and 25 °C. <sup>a</sup> Defined as the channel volume (mL)/flow rate (mL/min). <sup>b</sup> Isolated yield. <sup>c</sup> Estimated by <sup>1</sup>H NMR analysis. <sup>d</sup> Not determined due to the low solubility in CH<sub>2</sub>Cl<sub>2</sub> <sup>f</sup>.

### 3 References

- 1 A. F. Vaquer, A. Frongia, F. Secci and E. Tuveri, *RSC Adv.*, 2015, **5**, 96695–96704.
- 2 E. Rattanangkool, W. Krailat, T. Vilaivan, P. Phuwapraisirisan, M. Sukwattanasinitt and S. Wacharasindhu, *Eur. J. Org. Chem.*, 2014, **2014**, 4795–4804.
- 3 A. Talla, B. Driessen, N. J. W. Straathof, L.-G. Milroy, L. Brunsveld, V. Hessel and T. Noël, *Adv. Synth. Catal.*, 2015, **357**, 2180–2186.
- 4 H. Huang, J. Ash and J. Y. Kang, *Org. Biomol. Chem.*, 2018, **16**, 4236–4242.
- 5 P. Mampuy, Y. Zhu, S. Sergeyev, E. Ruijter, R. V. A. Orru, S. Van Doorslaer and B. U. W. Maes, *Org. Lett.*, 2016, **18**, 2808–2811.
- 6 M. Lo Conte and K. S. Carroll, *Angew. Chem. Int. Ed.*, 2012, **51**, 6502–6505.
- 7 H.-Y. Huang and C.-F. Liang, *Asian J. Org. Chem.*, 2018, **7**, 955–963.
- 8 F. Ishikawa, R. W. Haushalter and M. D. Burkart, *J. Am. Chem. Soc.*, 2012, **134**, 769–772.
- 9 V. Rathore, A. Upadhyay and S. Kumar, *Org. Lett.*, 2018, **20**, 6274–6278.
- 10 S. S. Shah, S. Karthik and N. D. P. Singh, *RSC Adv.*, 2015, **5**, 45416–45419.
- 11 M. Oba, K. Tanaka, K. Nishiyama and W. Ando, *J. Org. Chem.*, 2011, **76**, 4173–4177.
